# Supplementary material for: Programme theory and realist evaluation of the ‘Smoke-Free Vocational Schools’ research and intervention project: a study protocol
Source: PubMed Central journal article supplement — BMJ Open. 2021 Feb 4;11(2):e042728. doi: 10.1136/bmjopen-2020-042728 (PMC7925872; doi:10.1136/bmjopen-2020-042728), 2021-02-04
Supplement: bmjopen-2020-042728.draft_revisions.pdf [file bmjopen-2020-042728.draft_revisions.pdf]

# BMJ Open

BMJ Open is committed to open peer review. As part of this commitment we make the peer review history of every article we publish publicly available.

When an article is published we post the peer reviewers' comments and the authors' responses online. We also post the versions of the paper that were used during peer review. These are the versions that the peer review comments apply to.

The versions of the paper that follow are the versions that were submitted during the peer review process. They are not the versions of record or the final published versions. They should not be cited or distributed as the published version of this manuscript.

BMJ Open is an open access journal and the full, final, typeset and author-corrected version of record of the manuscript is available on our site with no access controls, subscription charges or pay-per-view fees (<http://bmjopen.bmj.com>).

If you have any questions on BMJ Open's open peer review process please email [info.bmjopen@bmj.com](mailto:info.bmjopen@bmj.com)

# BMJ Open

## Programme theory and evaluation of the 'Smoke-Free Vocational Schools' research and intervention project: a realist study protocol

|                               |                                                                                                                                                                                                                                                                                                                                                                                                                                                                                                                                                                                                                                                                                           |
|-------------------------------|-------------------------------------------------------------------------------------------------------------------------------------------------------------------------------------------------------------------------------------------------------------------------------------------------------------------------------------------------------------------------------------------------------------------------------------------------------------------------------------------------------------------------------------------------------------------------------------------------------------------------------------------------------------------------------------------|
| Journal:                      | <i>BMJ Open</i>                                                                                                                                                                                                                                                                                                                                                                                                                                                                                                                                                                                                                                                                           |
| Manuscript ID                 | bmjopen-2020-042728                                                                                                                                                                                                                                                                                                                                                                                                                                                                                                                                                                                                                                                                       |
| Article Type:                 | Protocol                                                                                                                                                                                                                                                                                                                                                                                                                                                                                                                                                                                                                                                                                  |
| Date Submitted by the Author: | 13-Jul-2020                                                                                                                                                                                                                                                                                                                                                                                                                                                                                                                                                                                                                                                                               |
| Complete List of Authors:     | Hjort, Anneke; Steno Diabetes Center Copenhagen, Health Promotion Research; University of Southern Denmark, National Institute of Public Health<br>Christiansen, Tenna; Danish Cancer Society, Cancer Prevention & Information<br>Stage, Maria; Danish Cancer Society, Cancer Prevention & Information<br>Rasmussen, Kathrine; Danish Heart Foundation , Prevention<br>Pisinger, Charlotta; University of Copenhagen, Center for Clinical Research and Prevention; Danish Heart Foundation , Prevention<br>Tjørnhøj-Thomsen, Tine; University of Southern Denmark, National Institute of Public Health<br>Klinker, Charlotte; Steno Diabetes Center Copenhagen, Health Promotion Research |
| Keywords:                     | PUBLIC HEALTH, Health policy < HEALTH SERVICES ADMINISTRATION & MANAGEMENT, QUALITATIVE RESEARCH, Protocols & guidelines < HEALTH SERVICES ADMINISTRATION & MANAGEMENT                                                                                                                                                                                                                                                                                                                                                                                                                                                                                                                    |
|                               |                                                                                                                                                                                                                                                                                                                                                                                                                                                                                                                                                                                                                                                                                           |

SCHOLARONE™  
Manuscripts

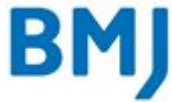

I, the Submitting Author has the right to grant and does grant on behalf of all authors of the Work (as defined in the below author licence), an exclusive licence and/or a non-exclusive licence for contributions from authors who are: i) UK Crown employees; ii) where BMJ has agreed a CC-BY licence shall apply, and/or iii) in accordance with the terms applicable for US Federal Government officers or employees acting as part of their official duties; on a worldwide, perpetual, irrevocable, royalty-free basis to BMJ Publishing Group Ltd ("BMJ") its licensees and where the relevant Journal is co-owned by BMJ to the co-owners of the Journal, to publish the Work in this journal and any other BMJ products and to exploit all rights, as set out in our [licence](#).

The Submitting Author accepts and understands that any supply made under these terms is made by BMJ to the Submitting Author unless you are acting as an employee on behalf of your employer or a postgraduate student of an affiliated institution which is paying any applicable article publishing charge ("APC") for Open Access articles. Where the Submitting Author wishes to make the Work available on an Open Access basis (and intends to pay the relevant APC), the terms of reuse of such Open Access shall be governed by a Creative Commons licence – details of these licences and which [Creative Commons](#) licence will apply to this Work are set out in our licence referred to above.

Other than as permitted in any relevant BMJ Author's Self Archiving Policies, I confirm this Work has not been accepted for publication elsewhere, is not being considered for publication elsewhere and does not duplicate material already published. I confirm all authors consent to publication of this Work and authorise the granting of this licence.

# Programme theory and evaluation of the 'Smoke-Free Vocational Schools' research and intervention project: a realist study protocol

Anneke Vang Hjort<sup>1,2</sup>, Tenna Børsting Christiansen<sup>3</sup>, Maria Stage<sup>3</sup>, Kathrine Højlund Rasmussen<sup>4</sup>, Charlotta Pisinger<sup>4,5</sup>, Tine Tjørnhøj-Thomsen<sup>2</sup> & Charlotte Demant Klinker<sup>1</sup>

1: Steno Diabetes Center Copenhagen, Health Promotion Research, Niels Steensens Vej 6, 2820 Gentofte, Denmark

2: The University of Southern Denmark, The National Institute of Public Health, Studiestræde 6, 1455 Copenhagen K, Denmark

3: The Danish Cancer Society, Cancer Prevention & Information, Strandboulevarden 49, 2100 Copenhagen, Denmark

4: The Danish Heart Foundation, Prevention, Vognmagergade 7, 1120 Copenhagen K, Denmark

5: University of Copenhagen, Center for Clinical Research and Prevention, Nordre Fasanvej 57, 2000 Frederiksberg, Denmark

---

Anneke Vang Hjort: [anneke.vang.hjort@regionh.dk](mailto:anneke.vang.hjort@regionh.dk)

Tenna Børsting Christiansen: [tennabc@cancer.dk](mailto:tennabc@cancer.dk)

Maria Stage: [marsta@cancer.dk](mailto:marsta@cancer.dk)

Kathrine Højlund Rasmussen: [katrasmussen@hjertereforeningen.dk](mailto:katrasmussen@hjertereforeningen.dk)

Charlotta Pisinger: [charlotta.pisinger@regionh.dk](mailto:charlotta.pisinger@regionh.dk)

Tine Tjørnhøj-Thomsen: [titt@sdu.dk](mailto:titt@sdu.dk)

Charlotte Demant Klinker: [charlotte.demant.klinker@regionh.dk](mailto:charlotte.demant.klinker@regionh.dk) (corresponding author)

Word count: 3937 words excluding title page, abstract, figures and tables, declarations, and references.

## Keywords

Study protocol. Realistic Evaluation. Programme theory. Smoke-free school hours. Policy implementation. School tobacco policy. Vocational education and training.

## ABSTRACT

**Introduction:** Smoke-free school hours (SFSH) entails a smoking ban during school hours and might be an effective intervention to reduce the high smoking prevalence in vocational schools. For SFSH to be effective, the policy must be adequately implemented and enforced; this challenge for schools constitutes a research gap. The ‘Smoke-Free Vocational Schools’ research and intervention project has been developed to facilitate schools’ implementation of SFSH. It is scheduled to run from 2018–2022, with SFSH being implemented in 11 Danish vocational schools. This study protocol describes the intervention programme theory and study design.

**Methods and analysis:** The study’s epistemological foundation is realistic evaluation, and it aims to develop an evidence-based model for implementing SFSH in vocational schools and similar settings. The project is developed in a collaboration between research and practice. Two public health NGOs are responsible for delivering the intervention activities in schools, while the research partner evaluates what works, for whom, and under what circumstances. The intervention lasts one year per school, targeting different socioecological levels. During the first six months, activities are delivered to stimulate organisational readiness to implement SFSH. Then, SFSH is established, and during the next six months, activities are delivered to stimulate the implementation of SFSH into routine practice. The evaluation focuses on both implementation (process evaluation) and outcomes. Process evaluation will determine the level of implementation and explore what hinders or enables SFSH becoming part of routine practice using both qualitative and quantitative methods. Outcomes evaluation will quantitatively assess the intervention’s effectiveness, with the primary outcome measure being changes in smoking during school hours.

**Ethics and dissemination:** Informed consent will be obtained from all study participants according to the GDPR and Danish data protection law. Study findings will be disseminated at national and international conferences and further published in open-access peer-reviewed journals.

## Strengths and limitations:

- The study draws on realistic evaluation and aims to answer both research and practice needs by generating new application-oriented knowledge on how to implement smoke-free school hours in vocational schools and similar settings.
- The study includes both implementation/process evaluation and outcomes evaluation in a unified multi-methods study design.
- The intervention has been developed in a joint venture between research and practice that emphasises including practice-based experience and research evidence, which may generate high external validity and more sustainable implementation practices.
- The study seeks to assess outcomes in a pretest-posttest study design without using control schools, which is appropriate in realistic evaluation but limits internal validity in relation to determining the intervention’s effectiveness.

## INTRODUCTION

From August 2021, a school tobacco policy (STP) of smoke-free school hours (SFSH) is expected to be ratified in all Danish educational institutions with at least one student aged under 18. The policy basically stipulates a smoking ban for students during school hours – both inside and outside school grounds. An expanded definition of SFSH also bans smoking by school staff, managers and visitors (smoke-free work hours). Additionally, SFSH might include all tobacco-related products (e.g. cigarettes, vapers, and snuff). SFSH is an expansion of traditional STPs, which do not prohibit smoking outside school grounds.<sup>1</sup> The rationale is the same: restricting smoking behaviour as a means to prevent exposure to second-hand smoke, smoking initiation, and smoking continuation among adolescents and young adults.<sup>2,3</sup> Restricting smoking behaviour can further be linked to political denormalization strategies aiming to make the future smoke-free: a tobacco endgame.<sup>4</sup> Evidence about SFSH is sparse, but some researchers<sup>5</sup> suggest that it might be more effective than traditional STPs, which have been shown to relocate smoking to just outside school premises (e.g. at the school entrance), and therefore do not remove smoking visibility.<sup>5,6</sup> Additionally, traditional STPs can have adverse effects on students with lower socioeconomic status (SES), (lower odds of anti-smoking social beliefs)<sup>7</sup>, which suggest that SFSH might be a more appropriate strategy in schools with low SES groups, such as vocational schools.

In Denmark, vocational education and training (VET) is a short, practical upper-secondary education for a specific service or industry, such as hairdresser, carpenter, office assistant, or chef. It is characterised by a combination of traditional in-school education and out-of-school apprenticeship in the future workplace. Danish vocational students have low SES backgrounds<sup>8</sup> and are overrepresented in smoking behaviour: 29% smoke daily, compared to 9% in general upper-secondary education.<sup>9,10</sup> The average vocational student age is 24, but as 14% of these students are aged 15–17,<sup>11</sup> the SFSH law will apply to Danish vocational schools. As such, the law has considerable health-promoting potential: it may not only reduce smoking within a vulnerable population group setting (vocational schools) but also contribute towards decreasing health inequality.<sup>12</sup> However, policies which are not well-implemented will not improve health.<sup>13–16</sup> We conceptualise the implementation of SFSH as a school organisational process with the end-goal of incorporating the policy into routine practice.<sup>17</sup> Staff and managers must enact and enforce the policy as part of their professional duties, and students must experience the policy as an accepted part of their everyday school life. Hence, enforcement is a significant task of organisational

1  
2  
3  
4 implementation.<sup>16,18–20</sup> Despite legislation imposing STPs in many secondary schools across Europe,  
5 they are often poorly implemented and enforced.<sup>21–24</sup>  
6  
7

8  
9 Three reviews have systematised decades of evidence related to STP implementation. The 2014  
10 systematic review by Galanti et al.<sup>15</sup> identified implementation components that improve STPs'  
11 impact on student smoking behaviour (e.g. strict and consistent enforcement). However, the authors  
12 also showed that most studies do not measure implementation fidelity and that enforcement is  
13 inconsistently operationalised across studies.<sup>15</sup> Two realist reviews,<sup>5,16</sup> as part of the SILNE-R project  
14 (2015–2018),<sup>25</sup> yield prominent new insights into the functioning of STPs. The first shows how STPs'  
15 implementation and comprehensiveness affects students' beliefs and behaviour: for example, if  
16 smoking is not visible during school hours, students feel less pressure to conform to others' smoking  
17 behaviour.<sup>5</sup> The second shows that staff enforcement depends on whether they 1) believe that STP  
18 enforcement is their role and duty, 2) have confidence to deal with students' negative responses when  
19 enforcing the rules, and 3) experience enforcement having a positive impact on students.<sup>16</sup> Other  
20 recent studies<sup>26–28</sup> have explored which practices facilitate or hinder adopting SFSH; one key finding  
21 is that schools should develop a shared understanding about the policy being part of their jurisdiction  
22 prior to implementation).<sup>26–28</sup> Seen together, the studies point towards important elements for schools  
23 to consider when implementing SFSH, but do not provide knowledge about what activities and  
24 processes can stimulate better implementation. In other words, most studies focus on understanding  
25 existing STPs rather than generating new knowledge about how to facilitate implementation. The  
26 latter might only be possible using interventionist study designs. One intervention study provides an  
27 important measure of STP implementation fidelity.<sup>29</sup> To the best of our knowledge, however, no  
28 intervention studies have examined how to stimulate or measure the process of implementing SFSH  
29 into routine practice. As such, it remains unclear how to best support, stimulate, and measure the  
30 implementation of SFSH.  
31  
32  
33  
34  
35  
36  
37  
38  
39  
40  
41  
42  
43  
44  
45  
46

47 To address the identified research gap, we developed the 'Smoke-Free Vocational Schools'  
48 intervention project, which aims to facilitate implementing SFSH in vocational schools and to  
49 generate new knowledge about the implementation and effectiveness of SFSH. The intervention takes  
50 place in 11 Danish vocational schools from 2018–2022.  
51  
52  
53  
54

### 55 **Realistic evaluation**

56 Realistic evaluation (RE) is the epistemological foundation of the intervention project. Pawson and  
57 Tilley developed the RE approach, arguing that to generate application-oriented knowledge for policy  
58  
59  
60

1  
2  
3  
4 and practice, it is more useful to address ‘what works, for whom and under what circumstances’,  
5 rather than evaluating whether an intervention ‘works’.<sup>30</sup> According to RE, interventions might  
6 generate different outcomes (O) in different contexts (C) by triggering underlying changes in  
7 reasoning and behaviour among participants – conceptualised as mechanisms (M).<sup>31</sup> As such,  
8 interventions may ‘work’ by enabling participants to make different choices, but the choices are  
9 always constrained by a context, such as the organisational norms, values, and discourses that operate  
10 in school settings. ‘Complex intervention’ is used to describe innovations within highly complex and  
11 emergent social systems,<sup>32</sup> such as schools.<sup>33–34</sup> It can be understood in relation to the RE notion of  
12 ‘open systems’, defined by Pawson and Tilley<sup>30</sup> as ‘[T]he acknowledgement that programs are  
13 implemented in a changing and permeable social world, and that program effectiveness may thus be  
14 subverted or enhanced through the unanticipated intrusion of new contexts’ (p. 218). Hence, the  
15 overall RE methodology is to examine C + M = O relations in complex interventions, known as CMO  
16 configurations.<sup>30</sup>

### 27 **Study aim**

28 In reporting complex interventions, the intervention and evaluation design must be clearly described  
29 to enable replication and synthesis of evidence,<sup>35,36</sup> yet many RE studies inadequately report their  
30 methodological practices.<sup>37–39</sup> Therefore, the aim of this study protocol is two-fold: 1) to describe the  
31 Smoke-Free Vocational Schools intervention, and 2) to present how the intervention is evaluated,  
32 including the study design, specific methods, and theoretical assumptions.

## 38 **METHODS AND ANALYSIS**

39 The overall objective of the Smoke-Free Vocational Schools intervention project is to develop an  
40 evidence-based model for implementing SFSH in Danish vocational schools and comparable settings.  
41 To accomplish the objective, the study examines what works, for whom, and under what  
42 circumstances. RE starts with the development of an initial programme theory (IPT).<sup>39</sup> Programme  
43 theory is theory incarnate, explicitly explaining which context-mechanisms should be triggered  
44 among different actors to produce desired outcomes.<sup>40,41</sup> In relation to the Smoke-Free Vocational  
45 Schools intervention, the IPT represents a hypothesis on how and why to implement SFSH and the  
46 study design is developed to test the hypothesis. We have structured the study protocol following the  
47 steps of the realist research cycle,<sup>39,42</sup> as shown in figure 1.

48 **Figure 1** Realist research cycle of the Smoke-Free Vocational Schools intervention project.



## Step 1: Programme theory

The intervention project is a collaboration between research and practice. Two Danish public health NGOs – the Danish Heart Foundation and the Danish Cancer Society – are practice partners, while Steno Diabetes Centre Copenhagen is the research partner. The practice partners are responsible for delivering the intervention activities in schools; the research partner is responsible for conducting a formative evaluation of the implementation processes and outcomes. The research and practice partners together developed the IPT, and it is part of our method to continually discuss and apply preliminary research findings as part of the formative evaluation. As such, we follow the proposal of RE<sup>37</sup> by iteratively testing and developing the programme theory in parallel to new empirical learnings.

The IPT was developed through a co-creation workshop. The practice partners contributed their extensive first-hand experience of implementing tobacco preventive efforts in different school contexts: for example, the Danish Cancer Society has tailored a motivational interviewing course to support smoking cessation by upper-secondary school students. The translation of practice-based experience and ideas into the intervention might increase the sustainability of implementation practices and improve external validity.<sup>43</sup> The research partner contributed with evidence on effective tobacco preventive methods in vocational schools, based on recent research and the results from a qualitative study on facilitators and barriers for implementing SFSH.<sup>28</sup> At the workshop, we developed a graphic representation of the intervention,<sup>44</sup> including the short- and long-term outputs, outcomes, and impact expected of different intervention activities targeting actors within and outside the school. The co-creation process also served as a learning and management tool, as the research and practice partners developed a shared understanding on how the intervention is expected to produce change, which is crucial in public health interventions.<sup>45</sup>

### The Smoke-Free Vocational Schools intervention

The intervention is delivered in two phases, each lasting approximately six months (as shown in figure 2). During phase 1, activities are delivered to stimulate organisational readiness<sup>46</sup> to implement SFSH: these include preparing staff and managers for their new professional tasks, and establishing new school-break facilities for students as alternatives to social smoking. At the beginning of phase 2, SFSH is established. During phase 2, activities are delivered to stimulate the gradual implementation of SFSH into routine practice by supporting schools in addressing emergent challenges, such as nicotine dependence or enforcement. Table 1 describes all the intervention activities.

**Figure 2** Graphic representation of the initial programme theory of the Smoke-Free Vocational Schools intervention. SFSH: Smoke-free school hours. The intervention activities delivered by practice partners are shown in purple. The activities or processes managed by schools but facilitated by practice partners are shown in green.

The activities are expected to produce short-term outputs, which are operationalised in four sets according to ecological levels<sup>47</sup>: 1) individual guidance, e.g. smoking cessation assistance for students (individual); 2) organisational development, e.g. development of professional skills and confidence to enforce SFSH (interpersonal); 3) physical environment changes, e.g. new school-break activities (structural/organisational); and 4) capacity building between school and community, e.g. increased cooperation between the school and the local municipality (community).

**Table 1** Description of intervention activities in the Smoke-Free Vocational Schools intervention.

| Activity                                   | Description                                                                                                                                                                                      | Purpose                                                                                                                                                                                                                                  | Participants                                                                                                                                           |
|--------------------------------------------|--------------------------------------------------------------------------------------------------------------------------------------------------------------------------------------------------|------------------------------------------------------------------------------------------------------------------------------------------------------------------------------------------------------------------------------------------|--------------------------------------------------------------------------------------------------------------------------------------------------------|
| Phase 1                                    |                                                                                                                                                                                                  |                                                                                                                                                                                                                                          |                                                                                                                                                        |
| First meeting                              | An initial meeting between the schools and practice partners, where the SFSH implementation plan is discussed.                                                                                   | To ensure that the schools have a clear implementation plan and know how the intervention activities can support them.<br>To clarify role distributions between different stakeholders.                                                  | Practice partners.<br>School principal and other management representatives.<br>School project coordinator.<br>Local municipality representative.      |
| Developing the SFSH policy                 | The schools develop their SFSH policy, including rules and responsibilities for sanctioning and enforcement. The practice partners provide inspirational material, e.g. other schools' policies. | To ensure the schools develop a clear SFSH policy, which aligns with the schools' rules of conduct.                                                                                                                                      | Decided locally in schools.<br>Practice partners recommend that schools establish a working group including both management and staff representatives. |
| Developing the SFSH communication strategy | The schools develop their internal and external SFSH communication strategy. The practice partners provide inspirational material and financial support to smoke-free signing.                   | To ensure that all organisational members (e.g. students and staff) and relevant external stakeholders (e.g. neighbours and apprenticeship workplaces) know what SFSH entails.                                                           | Decided locally in schools.                                                                                                                            |
| Workshop 1 on SFSH implementation          | A joint meeting at the schools for all school staff and managers, facilitated by the practice partners.                                                                                          | To stimulate a joint vision and understanding of why the school is implementing SFSH.<br>To ensure that all organisational members feel confident to enforce SFSH.<br>To address school-specific challenges and issues, e.g. resistance. | Practice partners.<br>All school staff and managers.<br>Local municipality representative.                                                             |
| Motivational interviewing course           | A selected group of school staff and managers attend a two-day course delivered by the practice partners.                                                                                        | To provide new knowledge and skills for the selected staff and managers, who are supposed to become key drivers of the implementation in school.<br>To help nicotine-addicted students to cope with not smoking during school hours.     | Practice partners.<br>Selected school staff and managers including the school project coordinator.<br>Local municipality representative.               |
| Smoking cessation assistance               | Offered to students and staff in collaboration with the local municipality.<br>The type of assistance varies between municipalities, depending                                                   | To help motivated staff and students quit smoking.                                                                                                                                                                                       | Students and staff.<br>Local municipality representative.                                                                                              |

|                                             |                                                                                                                                                                                                                                                          |                                                                                                                                                         |                                                                                                                                                                                          |
|---------------------------------------------|----------------------------------------------------------------------------------------------------------------------------------------------------------------------------------------------------------------------------------------------------------|---------------------------------------------------------------------------------------------------------------------------------------------------------|------------------------------------------------------------------------------------------------------------------------------------------------------------------------------------------|
|                                             | on local resources and availabilities.                                                                                                                                                                                                                   |                                                                                                                                                         |                                                                                                                                                                                          |
| Student workshop                            | A participatory student workshop on how to improve the social environment, delivered in schools by the practice partners. The schools are given financial support (averaging 15,000 € per school) to establish some of the best school-break activities. | To create alternatives to smoking communities at school.<br>To ensure that the new school-break activities are relevant for the students.               | Practice partners.<br>Selected group of students.<br>Local municipality representative.<br>The school management and school project coordinator approve the new school-break activities. |
| Removal of smoking facilities               | The schools remove smoking facilities, e.g. ashtrays.                                                                                                                                                                                                    | To signal that the school is smoke-free.                                                                                                                | Decided locally in schools.                                                                                                                                                              |
| Phase 2                                     |                                                                                                                                                                                                                                                          |                                                                                                                                                         |                                                                                                                                                                                          |
| The school tobacco policy of SFSH           | The SFSH policy is established in schools. The schools must enact and enforce the policy.                                                                                                                                                                | To prevent exposure to second-hand smoke.<br>To prevent smoking initiation and continuation.                                                            | Decided locally in schools.<br>Practice partners recommend that all school staff and managers play a role in enforcement.                                                                |
| Continued smoking cessation assistance      | Smoking cessation assistance is offered to students and staff in collaboration with the local municipality.<br>The type of smoking cessation assistance varies between municipalities, depending on local resources and availabilities.                  | To help motivated staff and students quit smoking.                                                                                                      | Students and staff.<br>Local municipality representative.                                                                                                                                |
| Network activities for intervention schools | A network for intervention schools is established by the practice partners. Two larger network activities for all schools are delivered during 2018–2020.                                                                                                | To facilitate schools exchanging experiences of implementing SFSH and learning from one another.                                                        | School principal and school project coordinator are invited.<br>Participation in network activities will be decided locally in schools.                                                  |
| Schools' own initiatives                    | Supportive actions which ease the implementation of SFSH.                                                                                                                                                                                                | Decided locally by schools.                                                                                                                             | Decided locally by schools.                                                                                                                                                              |
| Workshop 2                                  | A joint meeting at the schools for all staff and managers, facilitated by the practice partners.                                                                                                                                                         | To address school-specific challenges in relation to implementing SFSH.                                                                                 | Practice partners.<br>All school staff and managers.<br>Local municipality representative.                                                                                               |
| Final meeting                               | A final meeting between the schools and practice partners to discuss the SFSH maintenance plan.                                                                                                                                                          | To ensure the schools have a clear maintenance plan and know how the municipality and practice partners can support them after the intervention period. | Practice partners.<br>School principal.<br>School project coordinator.<br>Local municipality representative.                                                                             |

SFSH: Smoke-free school hours.

The activities and outputs are together expected to produce ‘mechanisms of change’, which are the underlying changes in reasoning and behaviour among participants, triggered by the intervention and the intervention context. We expect that the central context-mechanisms allowing SFSH to become part of routine practice will be found at the organisational level, where school staff and managers take responsibility for SFSH, feel confident to enforce SFSH, and feel motivated by positive student responses.<sup>16</sup> At the student level, we expect context-mechanisms to be triggered by: 1) staff and managers enforcing SFSH, resulting in decreased smoking visibility and, in turn, students becoming less prone to conform to others’ smoking behaviour;<sup>5</sup> and 2) the new school-break activities resulting

1  
2  
3  
4 in new practices and social norms at school.<sup>48</sup> As such, we expect SFSH to become a natural and  
5 accepted part of students' everyday school life.  
6  
7

8 The mechanisms of change are expected to result in outcomes related to students' smoking behaviour.  
9 Our primary outcome measure is 'changes in smoking during school hours', while the secondary  
10 outcome measure is 'changes in the number of cigarettes smoked per day'; both are proximal  
11 outcomes. The intermediate outcome measures are 'changes in intention to quit' and 'changes in  
12 smoking status'. The long-term impact of the intervention will not be evaluated as part of this study.  
13  
14  
15  
16  
17

## 18 19 **Step 2: Study design**

20 The study is designed to test the IPT through focusing on both implementation/process evaluation  
21 and outcomes evaluation. As considered most appropriate in RE,<sup>30,37</sup> we use a multi-methods design,  
22 which allows us to quantify some elements of CMO configurations (e.g. changes in smoking  
23 behaviour) and qualitatively explore the change mechanisms and context.<sup>49</sup> The process evaluation  
24 investigates to what extent the intervention activities have been delivered and are implemented  
25 according to the programme theory, and seeks to explore the mechanisms that hinder or enable SFSH  
26 becoming part of routine practice. The outcomes evaluation assesses the intervention's outcomes in  
27 terms of students' smoking behaviour, using a one-group pretest-posttest study design, with sub-  
28 group analysis further determining for whom the intervention is most effective.  
29  
30  
31  
32  
33  
34  
35

36 The intervention is delivered at 11 schools during 2018–2020, seven of which are included in the  
37 evaluation. The remaining four are considered 'pilot schools', where the intervention activities and  
38 evaluation methods (e.g. questionnaires) are tested and adjusted. The practice partners recruited  
39 schools that wanted to implement the expanded version of SFSH, banning all tobacco-related  
40 products (e.g. cigarettes, vapers, and snuff) during school and work hours for students, staff, and  
41 visitors. The sample of seven vocational schools accounts for 10% of all Danish vocational schools;  
42 represents all four main educational areas (Technical, Business, Agriculture and food services, and  
43 Social and health services); and covers three (out of five) geographical regions. As such, the study  
44 sample includes a broad variety of vocational school contexts across the country and is, thus,  
45 considered representative of all Danish vocational schools.  
46  
47  
48  
49  
50  
51  
52  
53  
54  
55  
56  
57  
58  
59  
60

## Process evaluation

The process evaluation comprises two mutually informing parts based on the RE-compatible<sup>50</sup> Medical Research Councils guidelines for Process Evaluation of Complex Interventions.<sup>35</sup> Our operationalisation of the framework in the study is shown in figure 3.

**Figure 3** Process evaluation of the Smoke-Free Vocational Schools intervention, based on the Medical Research Councils guidelines for process evaluation of complex interventions.

The ‘Implementation degree’ study quantitatively measures implementation levels for each of the four sets of outputs and for the SFSH policy based on fidelity, adaptations, dose, quality of delivery, participant responsiveness, and reach. Hence, the study seeks to occupy a middle position in the fidelity vs. adaptations debate<sup>50</sup> with an emphasis on measuring both central intervention implementation (e.g. extent of enforcement) and the schools’ contextual initiatives and tailoring (e.g. means and methods of enforcement). The ‘Mechanisms of change’ study explores the implementation processes using both qualitative and quantitative methods. Normalisation process theory<sup>17</sup> proposes that implementation processes are shaped and motivated by four generative mechanisms – coherence, cognitive participation, collective action, and reflexive monitoring. This will be the guiding theory in the investigation of processes that hinder or enable SFSH becoming part of routine practice.

## Outcomes evaluation

The outcomes evaluation assesses the effectiveness of the intervention in terms of the primary and secondary outcomes, measured before SFSH (T1), six months after the establishment of SFSH (T2), and twelve months after the establishment of SFSH (T3), as shown in figure 4. The primary outcome measure is changes in 1) smoking during school hours (dichotomous – y/n); the secondary outcome measures are changes in 2a) the number of cigarettes smoked per day (continuous), 2b) intention to quit (nominal), and 2c) smoking status (nominal). Further, to elaborate on CMO configurations, subgroup analyses are performed to investigate for whom the intervention is most effective and to explore relations between findings from the process evaluation, that is, the SFSH implementation fidelity measure and quantitative indicators of implementation processes. The study thus seeks to elaborate on outcomes within the programme and/or in different localities and subgroups within the population without using control schools, which is considered appropriate for RE.<sup>37,51,52</sup>

**Figure 4** Outcomes evaluation for the Smoke-Free Vocational Schools intervention.

### Step 3: Data collection

The evaluation lasts approximately 1.5 years per school and covers intervention phase 1 (six months) and intervention phase 2 (six months), with the final follow-up conducted six months after the intervention has ended. During this time period, qualitative and quantitative data will be collected from students, staff, and managers to increase the validity of findings.<sup>53</sup> Table 2 presents an overview of all data collection measures and procedures, including estimates of eligible participants and expected response rates. The different data collection measures provide cross-cutting insights for the process and outcomes evaluations. A preliminary operationalisation of how the data contribute to each is presented in Supplementary File 1.

#### Student surveys

Electronic student surveys are conducted during school hours at three different time points. Students self-report smoking behaviour<sup>54</sup> and intention to quit,<sup>55</sup> smoking-related rules and practices and social norms at school,<sup>56–61</sup> self-efficacy,<sup>62–64</sup> well-being,<sup>65,66</sup> educational information, and demographics. Validated questions have been used when possible and the questionnaire has been pilot-tested in two vocational school classes (n=30 participants) to ensure face validity.<sup>67</sup> Due to the VET school structure, combining in-school education and apprenticeships, individual follow-up is rarely possible. Instead, both paired data from the same individuals and cross-sectional data will be collected. To maximise response rates, data collection is organised by the research partners in each school and conducted during school hours. The students are given time to complete the questionnaire and ask questions. The survey takes approximately 30 minutes per school class. Based on experience with the procedure,<sup>9</sup> we expect that 95% of students will participate in the study.

#### Sample size calculation

The outcome measure used to determine sample size is change in the number of cigarettes smoked during school hours per day, per student, based on individual follow-up data. We assume that 30% are daily smokers who averagely smoke 18 cigarettes per day, including 8 during school hours.<sup>68</sup> We assume that the intervention will reduce smoking intensity during school hours by 50%, meaning a reduction of 4 cigarettes smoked per school day (with a standard deviation of 4 and 3 and correlation = 0.3). To avoid type-I errors and type-II errors, we respectively chose a 5% significance level and power at 80%. Assuming that the data are normally distributed, we will need to conduct individual follow-up on 11 daily smokers per school. We expect a 30% reduction in participants from baseline to follow-up. Accounting for this, the sample size must include 14.3 daily smokers per school. Thus, if the smoking prevalence is 30%, 24.4 students per school must participate in the prospective study.

As seven schools are participating, the sample size for the prospective study must include (at least) 171 students.

### Staff and project coordinator surveys

Staff and project coordinator surveys are electronically distributed to all school organisational members – i.e. managers, teaching staff, counsellors, administrative and kitchen staff, etc. – at three different time points to follow the gradual implementation of SFSH. It is important to include all organisational members as all are expected to be affected by SFSH. The surveys include questions to investigate the implementation degree (e.g. fidelity, dose) and the validated NoMAD scale<sup>69,70</sup> to grasp the implementation processes. The project coordinator surveys include additional questions about the implementation work (e.g. collaboration with the local municipality and contextual tailoring). The surveys have been pilot-tested among staff, managers, and project coordinators at the four pilot schools (n=23 participants) to ensure face validity.<sup>67</sup>

### Structured observations

Structured observations on school grounds are carried out by the researchers at the same time points as the student surveys. Inspired by other studies,<sup>71,72</sup> the structured observations will include observations on smoking visibility (e.g. who, where, and how many smokers are visible during school hours) and physical environment changes (e.g. smoke-free signing and removal of smoking facilities).

Data will be registered as field notes.

**Interviews and focus groups with principal manager, project coordinator, and teachers**  
Semi-structured individual interviews and focus groups with school principals, project coordinators, and teachers are carried out to explore the implementation processes in terms of intervention modalities, change mechanisms, and context features.<sup>73</sup> It is important to gather interview material from the different respondent groups as they provide different perspectives, challenges, and opportunities in relation to implementing SFSH. Specifically, school principals have decision-making power on SFSH and knowledge about school strategic-political processes; project coordinators have in-depth knowledge and experience of all actions for implementing SFSH; and teachers have direct contact with students and are expected to play a large role in enforcing SFSH.

**Table 2** Overview of data in the Smoke-Free Vocational Schools intervention project, including eligible participants (n), expected response rates (n), and data collection procedures.

| Data collection | When | N (eligible) | N (expected) | Procedure |
|-----------------|------|--------------|--------------|-----------|
|-----------------|------|--------------|--------------|-----------|

|                                           |                       |       |       |                                                                                                                                                                                                                                                      |
|-------------------------------------------|-----------------------|-------|-------|------------------------------------------------------------------------------------------------------------------------------------------------------------------------------------------------------------------------------------------------------|
| Student survey 1                          | Before SFSH           | 3,000 | 2,000 | Baseline measure focusing on smoking behaviour, etc. Electronic questionnaire distributed by the research team (in school).                                                                                                                          |
| Structured observations on school grounds | Before SFSH           | NA    | NA    | Structured observations focusing on smoke-free signing, smoking facilities, and smoking visibility (in school).                                                                                                                                      |
| Staff survey 1                            | Before SFSH           | 1,200 | 600   | Electronic questionnaire distributed to all staff and managers about SFSH preparation (email).                                                                                                                                                       |
| Project coordinator survey 1              | Before SFSH           | 7     | 7     | In-depth electronic questionnaire concerning SFSH preparation (email).                                                                                                                                                                               |
| Principal manager interview               | Before SFSH           | 7     | 7     | Semi-structured interview focusing on SFSH preparation, including motivation and past experiences (in school or via Skype).                                                                                                                          |
| Student survey 2                          | 6 months after SFSH   | 3,000 | 2,000 | Follow-up 1 measure focusing on smoking behaviour, etc. Electronic questionnaire distributed by the research team (in school).                                                                                                                       |
| Structured observations on school grounds | 6 months after SFSH   | NA    | NA    | Structured observations focusing on smoke-free signing, smoking facilities, and smoking visibility (in school).                                                                                                                                      |
| Staff survey 2                            | 6 months after SFSH   | 1,200 | 600   | Electronic questionnaire distributed to all staff and managers about the gradual SFSH implementation (email).                                                                                                                                        |
| Project coordinator survey 2              | 6 months after SFSH   | 7     | 7     | In-depth electronic questionnaire about the gradual SFSH implementation (email).                                                                                                                                                                     |
| Staff focus group                         | 6–8 months after SFSH | 21–42 | 21–42 | Focus groups with teaching staff, counsellors, and/or others assigned a special role in relation to SFSH. Focusing on daily practice, reasoning, and how/if the intervention has supported the gradual SFSH implementation (in school or via Skype). |
| Project coordinator interview             | 6–8 months after SFSH | 7     | 7     | Semi-structured interview focusing on daily practice, reasoning, and how/if the intervention has supported the gradual SFSH implementation (in school or via Skype).                                                                                 |
| Student survey 3                          | 12 months after SFSH  | 3,000 | 2,000 | Follow-up 2 measure focusing on smoking behaviour, etc. Electronic questionnaire distributed by the research team (in school).                                                                                                                       |
| Structured observations on school grounds | 12 months after SFSH  | NA    | NA    | Structured observations focusing on smoke-free signing, smoking facilities, and smoking visibility (in school).                                                                                                                                      |
| Staff survey 3                            | 12 months after SFSH  | 1,200 | 600   | Electronic questionnaire distributed to all staff and managers about the gradual SFSH implementation (email).                                                                                                                                        |
| Facilitator survey (NGOs)                 | Before and after SFSH | NA    | NA    | Electronic questionnaire distributed to the practice partners in relation to different intervention activities, i.e. student and staff workshops and courses.                                                                                        |

SFSH: Smoke-free school hours.

## Step 4: Data analysis

### Process evaluation

Implementation levels are assessed using confirmatory factor analysis.<sup>74</sup> Inspired by Bast et al.,<sup>29</sup> data are used to develop indexes of low and high implementation degree, while associations between the outputs and the overall SFSH implementation fidelity model are analysed using regression analysis. This allows us to investigate to what extent the intervention activities predict the implementation



1  
2  
3  
4 degree of SFSH. Mechanisms of change are explored by combining qualitative and quantitative data  
5 and by using the generative mechanisms proposed by normalisation process theory (coherence,  
6 cognitive participation, collective action, and reflexive monitoring) to structure the analysis.  
7  
8 Qualitative data will be coded using an abductive approach, whereas quantitative data will be  
9 analysed using descriptive techniques to further explain, supplement, or challenge the qualitative  
10 analyses of what enables or hinders SFSH becoming part of routine practice.  
11  
12  
13  
14

### 15 Outcomes evaluation

16 The outcomes evaluation uses multi-level linear or logistic regression, depending on the outcome  
17 measures.<sup>75</sup> The primary analysis will be a two-level model, with students (level 1) nested in schools  
18 (level 2). In secondary analysis, we will investigate effects according to pre-defined subgroups, such  
19 as sex, age, and SES. To further elaborate on CMO configurations, we will test the associations  
20 between quantitative measures of implementation degree and implementation processes from the  
21 process evaluation, using descriptive analysis, logistic regression, and/or factor analysis.<sup>76,77</sup>  
22  
23  
24  
25  
26  
27

### 28 **Step 5: Synthesis**

29 Empirical and theoretical knowledge about the implementation and outcomes of the intervention will  
30 be synthesised into recommendations on how to implement SFSH. RE advocates using retrodution  
31 and abduction in iterative processes to test and refine IPT.<sup>37,73,78</sup> Retrodution is a form of inference  
32 that seeks to identify and verify the mechanisms theorised to have generated the phenomena under  
33 study,<sup>73,78</sup> whereas abduction is the process of describing empirical data using theoretical concepts,<sup>73</sup>  
34 with emphasis on analysing data that fall outside an initial theoretical frame or premise.<sup>78,79</sup> Regarding  
35 the Smoke-Free Vocational Schools intervention project, our goal is to integrate qualitative and  
36 quantitative findings from the process and outcomes evaluations to re-analyse the IPT in terms of  
37 what works, for whom, and under what circumstances, using a retroductive-abductive approach.  
38 Based on the refined programme theory, we will be able to develop model recommendations for  
39 implementing SFSH in vocational schools and similar settings.  
40  
41  
42  
43  
44  
45  
46  
47  
48

## 49 **ETHICS AND DISSEMINATION**

50 In public health interventions it is important to examine and clarify possible negative reverse effects,  
51 so as to avoid further interventions generating the same negative effects.<sup>80</sup> Therefore, unexpected  
52 consequences of the intervention will be explored and reported to minimise and avoid participants  
53 feeling stigmatised in this study and similar future studies.  
54  
55  
56  
57  
58  
59  
60

1  
2  
3  
4 The study has been reported to the Capital Region of Denmark's legal centre for personal data  
5 handling (journal number: VD-2018-485). Informed consent will be obtained from all study  
6 participants according to the General Data Protection Regulation and Danish data protection law.  
7  
8 Study findings will be disseminated at international and national conferences and further published  
9 in open-access peer-reviewed journals. Also, the study findings will be used by the practice partners  
10 in their further work supporting schools implementing SFSH, as well as by other stakeholders (e.g.  
11 schools).  
12  
13  
14  
15  
16

## 17 Declarations

### 18 Acknowledgements

19 Great thanks to the participating vocational schools who readily share their time and experiences  
20 with the research team.  
21  
22  
23

### 24 Funding statement

25 This work was supported by The Danish Health Authority grant number: 1-1010-308/56  
26  
27

### 28 Authors contributions

29 The authors contributions to different aspects of this work were as follows: Conceiving and  
30 designing the study: AVH, TBC, MS, KHR and CDK; Refining the study design and obtaining  
31 ethical approval: AVH, CP, TTT, CDK; Writing and revising this manuscript (fully or in part):  
32 AVH, TBC, MS, KHR, CP, TTT, CDK.  
33  
34

### 35 Patient and public partnership

36 The research and intervention project is a collaboration between research and practice: Two Danish  
37 public health NGOs (the Danish Heart Foundation and the Danish Cancer Society) are practice  
38 partners, whereas Steno Diabetes Center Copenhagen is research partner. The intervention has been  
39 cocreated through a participatory process, with an emphasis on including both evidence and practice  
40 experience. Further, the practice partners involved in the design and conduct of the study, the choice  
41 of outcome measures and recruitment to the study.  
42  
43  
44

### 45 Competing interests

46 The authors declare that they have no competing interests.  
47  
48  
49  
50  
51  
52

## 53 REFERENCES

- 54 1. Boyce, J. C., Mueller, N. B., Hogan-Watts, M. & Luke, D. A. Evaluating the Strength of School  
55 Tobacco Policies: The Development of a Practical Rating System. *J. Sch. Health* **79**, 495–504 (2009).  
56  
57  
58  
59  
60

- 1  
2  
3  
4 2. Agaku, I. T., Obadan, E. M., Odukoya, O. O. & Olufajo, O. Tobacco-free schools as a core  
5 component of youth tobacco prevention programs: a secondary analysis of data from 43 countries. *Eur. J.*  
6 *Public Health* **25**, 210–215 (2015).  
7
- 8  
9 3. Aveyard, P., Markham, W. A. & Cheng, K. . A methodological and substantive review of the  
10 evidence that schools cause pupils to smoke. *Soc. Sci. Med.* **58**, 2253–2265 (2004).  
11
- 12 4. Sæbø, G. & Scheffels, J. Assessing notions of denormalization and renormalization of  
13 smoking in light of e-cigarette regulation. *Int. J. Drug Policy* **49**, 58–64 (2017).  
14
- 15 5. Schreuders, M., Nuyts, P. A. W., van den Putte, B. & Kunst, A. E. Understanding the impact of  
16 school tobacco policies on adolescent smoking behaviour: A realist review. *Soc. Sci. Med.* **183**, 19–27  
17 (2017).  
18
- 19 6. Leatherdale, S. T., Brown, K. S., Cameron, R. & McDonald, P. W. Social modeling in the school  
20 environment, student characteristics, and smoking susceptibility: A multi-level analysis. *J. Adolesc. Health*  
21 **37**, 330–336 (2005).  
22
- 23 7. Schreuders, M. *et al.* The association between smoke-free school policies and adolescents'  
24 anti-smoking beliefs: Moderation by family smoking norms. *Drug Alcohol Depend.* **204**, 107521 (2019).  
25
- 26 8. *Erhvervsuddannelser i Danmark 2019 [Vocational Education and Training in Denmark 2019].*  
27 (Danmarks Statistik [Statistics Denmark], 2019).  
28
- 29 9. Klinker, C. D. *et al.* Health Literacy is Associated with Health Behaviors in Students from  
30 Vocational Education and Training Schools: A Danish Population-Based Survey. *Int. J. Environ. Res. Public*  
31 *Health* **17**, 671 (2020).  
32
- 33 10. Veronica Pisinger *et al.* *UNG19 - Sundhed og trivsel på gymnasiale uddannelser 2019 [The*  
34 *Health and Wellbeing survey in Danish general upper secondary education].* (2019).  
35
- 36 11. Uddannelsesstatistik [Educational statistics Denmark]. *Uddannelsesstatistik*  
37 <https://uddannelsesstatistik.dk/Pages/Reports/1838.aspx>.  
38
- 39 12. Frohlich, K. L. & Potvin, L. Transcending the Known in Public Health Practice: The Inequality  
40 Paradox: The Population Approach and Vulnerable Populations. *Am. J. Public Health* **98**, 216–221 (2008).  
41
- 42 13. Durlak, J. A. & DuPre, E. P. Implementation Matters: A Review of Research on the Influence  
43 of Implementation on Program Outcomes and the Factors Affecting Implementation. *Am. J. Community*  
44 *Psychol.* **41**, 327–350 (2008).  
45
- 46 14. Murray, E. *et al.* Normalisation process theory: a framework for developing, evaluating and  
47 implementing complex interventions. *BMC Med.* **8**, (2010).  
48
- 49 15. Galanti, M. R., Coppo, A., Jonsson, E., Bremberg, S. & Faggiano, F. Anti-tobacco policy in  
50 schools: upcoming preventive strategy or prevention myth? A review of 31 studies. *Tob. Control* **23**, 295  
51 (2014).  
52  
53  
54  
55  
56  
57  
58  
59  
60

16. Linnansaari, A., Schreuders, M., Kunst, A. E., Rimpelä, A. & Lindfors, P. Understanding school staff members' enforcement of school tobacco policies to achieve tobacco-free school: a realist review. *Syst. Rev.* **8**, (2019).
17. May, C. & Finch, T. Implementing, Embedding, and Integrating Practices: An Outline of Normalization Process Theory. *Sociology* **43**, 535–554 (2009).
18. Lipperman-Kreda, S., Paschall, M. J. & Grube, J. W. Perceived enforcement of school tobacco policy and adolescents' cigarette smoking. *Prev. Med.* **48**, 562–566 (2009).
19. Adams, M. L., Jason, L. A., Pokorny, S. & Hunt, Y. The Relationship Between School Policies and Youth Tobacco Use\*. *J. Sch. Health* **79**, 17–23 (2009).
20. Moore, L. School smoking policies and smoking prevalence among adolescents: multilevel analysis of cross-sectional data from Wales. *Tob. Control* **10**, 117–123 (2001).
21. Jarlstrup, N. S. *et al.* International Approaches to Tobacco Use Cessation Programs and Policy in Adolescents and Young Adults: Denmark. *Curr. Addict. Rep.* **5**, 42–53 (2018).
22. Gordon, J. Ifs, maybes and butts: factors influencing staff enforcement of pupil smoking restrictions. *Health Educ. Res.* **18**, 329–340 (2003).
23. Turner, K. M. Butt in, butt out: pupils' views on the extent to which staff could and should enforce smoking restrictions. *Health Educ. Res.* **19**, 40–50 (2004).
24. Schreuders, M., Linnansaari, A., Lindfors, P., van den Putte, B. & Kunst, A. E. Why staff at European schools abstain from enforcing smoke-free policies on persistent violators. *Health Promot. Int.* (2019) doi:10.1093/heapro/daz111.
25. SILNE-R. *SILNE-R. Enhancing the effectiveness of programs and strategies to prevent smoking by adolescents: a realist evaluation comparing seven European countries* <http://silne-r.ensp.network/about-silne/objectives/>.
26. SILNE-R consortium, Schreuders, M., van den Putte, B. & Kunst, A. E. Why Secondary Schools Do Not Implement Far-Reaching Smoke-Free Policies: Exploring Deep Core, Policy Core, and Secondary Beliefs of School Staff in the Netherlands. *Int. J. Behav. Med.* **26**, 608–618 (2019).
27. Heinze, C., Hjort, A. V., Elsborg, P., Maindal, H. T. & Klinker, C. D. Smoke-free-school-hours at vocational education and training schools in Denmark: attitudes among managers and teaching staff – a national cross-sectional study. *BMC Public Health* **19**, (2019).
28. Kathrine Højlund Rasmussen, Anneke Vang Hansen, Charlotte Demant Klinker, & Steffen Löfvall, Clara Heinze. *Udbredelse af røgfri skoletid på erhvervsskoler: en forundersøgelse til en effektiv tobaksforebyggelsesindsats på erhvervsskoler.* (Hjerteforeningen : Steno Diabetes Center, 2018).
29. Bast, L. S. *et al.* High impact of implementation on school-based smoking prevention: the X:IT study—a cluster-randomized smoking prevention trial. *Implement. Sci.* **11**, (2015).

- 1
- 2
- 3
- 4
- 5 30. Pawson, R. & Tilley, N. *Realistic evaluation*. (Sage, 1997).
- 6
- 7 31. Dalkin, S. M., Greenhalgh, J., Jones, D., Cunningham, B. & Lhussier, M. What's in a  
8 mechanism? Development of a key concept in realist evaluation. *Implement. Sci.* **10**, (2015).
- 9
- 10 32. Moore, G. F. *et al.* From complex social interventions to interventions in complex social  
11 systems: Future directions and unresolved questions for intervention development and evaluation.  
12 *Evaluation* **25**, 23–45 (2019).
- 13
- 14 33. Hawe, P., Shiell, A. & Riley, T. Theorising Interventions as Events in Systems. *Am. J.*  
15 *Community Psychol.* **43**, 267–276 (2009).
- 16
- 17 34. Keshavarz, N., Nutbeam, D., Rowling, L. & Khavarpour, F. Schools as social complex adaptive  
18 systems: A new way to understand the challenges of introducing the health promoting schools concept.  
19 *Soc. Sci. Med.* **70**, 1467–1474 (2010).
- 20
- 21 35. Moore, G. F. *et al.* Process evaluation of complex interventions: Medical Research Council  
22 guidance. *BMJ* **350**, h1258–h1258 (2015).
- 23
- 24 36. Craig, P. *et al.* Developing and evaluating complex interventions: the new Medical Research  
25 Council guidance. *BMJ* a1655 (2008) doi:10.1136/bmj.a1655.
- 26
- 27 37. Wong, G. *et al.* Quality and reporting standards, resources, training materials and  
28 information for realist evaluation: the RAMESES II project. *Health Serv. Deliv. Res.* **5**, 1–108 (2017).
- 29
- 30 38. Gilmore, B., McAuliffe, E., Power, J. & Vallières, F. Data Analysis and Synthesis Within a  
31 Realist Evaluation: Toward More Transparent Methodological Approaches. *Int. J. Qual. Methods* **18**,  
32 160940691985975 (2019).
- 33
- 34 39. Marchal, B., van Belle, S., van Olmen, J., Hoérée, T. & Kegels, G. Is realist evaluation keeping  
35 its promise? A review of published empirical studies in the field of health systems research. *Evaluation* **18**,  
36 192–212 (2012).
- 37
- 38 40. Glynn Sharpe. A Review of Program Theory and Theory-Based Evaluations. *Am. Int. J.*  
39 *Contemp. Res.* (2011).
- 40
- 41 41. Ray Pawson & Sanjeev Sridharan. Chapter 4: Theory-driven evaluation of public health  
42 programmes. in *Evidence-based Public Health: Effectiveness and efficiency* vol. 2009 (Oxford University  
43 Press).
- 44
- 45 42. Marchal, B., Giral, A. N., Sulaberidze, L., Chikovani, I. & Abejirinde, I.-O. O. Designing and  
46 evaluating provider results-based financing for tuberculosis care in Georgia: a realist evaluation protocol.  
47 *BMJ Open* **9**, e030257 (2019).
- 48
- 49 43. Evans, R., Scourfield, J. & Murphy, S. Pragmatic, formative process evaluations of complex  
50 interventions and why we need more of them. *J. Epidemiol. Community Health* **69**, 925–926 (2015).
- 51
- 52
- 53
- 54
- 55
- 56
- 57
- 58
- 59
- 60

- 1  
2  
3  
4 44. Kellogg Foundation 2004. Using Logic Models to Bring Together Planning, Evaluation, and  
5 Action. Logic Model Development Guide.  
6  
7  
8 45. Rod, M. H., Ingholt, L., Bang Sørensen, B. & Tjørnhøj-Thomsen, T. The spirit of the  
9 intervention: reflections on social effectiveness in public health intervention research. *Crit. Public Health*  
10 **24**, 296–307 (2014).  
11  
12 46. Weiner, B. J. A theory of organizational readiness for change. *Implement. Sci.* **4**, (2009).  
13  
14 47. McLeroy, K. R., Bibeau, D., Steckler, A. & Glanz, K. An ecological perspective on health  
15 promotion programs. *Health Educ. Q.* **15**, 351–377 (1988).  
16  
17 48. Ingholt, L. *et al.* How can we strengthen students' social relations in order to reduce school  
18 dropout? An intervention development study within four Danish vocational schools. *BMC Public Health* **15**,  
19 (2015).  
20  
21  
22 49. Rogers, P. J. Using Programme Theory to Evaluate Complicated and Complex Aspects of  
23 Interventions. *Evaluation* **14**, 29–48 (2008).  
24  
25 50. Graham Moore<sup>1,2</sup> *et al.* *Process evaluation of complex interventions. UK Medical Research*  
26 *Council (MRC) guidance. Full text.* ([https://mrc.ukri.org/documents/pdf/mrc-phsrn-process-evaluation-](https://mrc.ukri.org/documents/pdf/mrc-phsrn-process-evaluation-guidance-final/)  
27 [guidance-final/](https://mrc.ukri.org/documents/pdf/mrc-phsrn-process-evaluation-guidance-final/)).  
28  
29 51. Wong, G., Greenhalgh, T., Westhorp, G., Buckingham, J. & Pawson, R. RAMESES publication  
30 standards: realist syntheses. *BMC Med.* **11**, (2013).  
31  
32 52. Hawkins, A. J. Realist evaluation and randomised controlled trials for testing program theory  
33 in complex social systems. *Evaluation* **22**, 270–285 (2016).  
34  
35 53. Suter, W. *Introduction to Educational Research: A Critical Thinking Approach.* (SAGE  
36 Publications, Inc., 2012). doi:10.4135/9781483384443.  
37  
38 54. Kremers, S. P. J., Mudde, A. N. & de Vries, H. Development and Longitudinal Test of an  
39 Instrument to Measure Behavioral Stages of Smoking Initiation. *Subst. Use Misuse* **39**, 225–252 (2004).  
40  
41 55. Prochaska, J. O. & Velicer, W. F. The Transtheoretical Model of Health Behavior Change. *Am.*  
42 *J. Health Promot.* **12**, 38–48 (1997).  
43  
44 56. Chung, A. & Rimal, R. N. Social norms: A review. *Rev. Commun. Res.* **4**, 1–28 (2016).  
45  
46 57. Eisenberg, M. E. & Forster, J. L. Adolescent smoking behavior: measures of social norms. *Am.*  
47 *J. Prev. Med.* **25**, 122–128 (2003).  
48  
49 58. *Lozano, P. A. (2016). Smoking-Related Stigma: A Public Health Tool Or A Damaging Force ?.*  
50 *(Doctoral dissertation). Retrieved from <https://scholarcommons.sc.edu/etd/3488>.*  
51  
52 59. Dohnke, B., Weiss-Gerlach, E. & Spies, C. D. Social influences on the motivation to quit  
53 smoking: Main and moderating effects of social norms. *Addict. Behav.* **36**, 286–293 (2011).  
54  
55  
56  
57  
58  
59  
60

- 1  
2  
3  
4 60. Katherine East. *The Development of Tools to Measure Norms Towards Smoking, Nicotine Use, and the Tobacco Industry*. 2017.
- 5  
6  
7  
8 61. Brown-Johnson, C. G. *et al.* Validity and reliability of the internalized stigma of smoking  
9 inventory: An exploration of shame, isolation, and discrimination in smokers with mental health diagnoses:  
10 Smoking Stigma Scale. *Am. J. Addict.* **24**, 410–418 (2015).
- 11  
12 62. Conner, M., Conner, M., Sandberg, T., McMillan, B. & Higgins, A. Role of anticipated regret,  
13 intentions and intention stability in adolescent smoking initiation. *Br. J. Health Psychol.* **11**, 85–101 (2006).
- 14  
15 63. Romppel, M. *et al.* A short form of the General Self-Efficacy Scale (GSE-6): Development,  
16 psychometric properties and validity in an intercultural non-clinical sample and a sample of patients at risk  
17 for heart failure. *GMS Psycho-Soc.-Med.* *10Doc01 ISSN 1860-5214* (2013) doi:10.3205/psm000091.
- 18  
19 64. Sterling, K. L., Ford, K. H., Park, H. & McAlister, A. L. Scales of Smoking-Related Self-Efficacy,  
20 Beliefs, and Intention: Assessing Measurement Invariance among Intermittent and Daily High School  
21 Smokers. *Am. J. Health Promot.* **28**, 310–315 (2014).
- 22  
23 65. Hans Henrik Knoop, Aarhus Universitet, Bjørn E. Holstein, Syddansk Universitet, Hanne  
24 Viskum, Professionshøjskolen Metropol & Jannie Moon Lindskov, DCUM. *Elevernes fællesskab og trivsel i*  
25 *skolen. Analyser af Den Nationale Trivselsmåling [Pupils communities and well-being in primary school.*  
26 *Analysis based on the national well-being survey]*. [https://dcum.dk/media/2107/dcum-rapport-elevernes-](https://dcum.dk/media/2107/dcum-rapport-elevernes-trivsellow.pdf)  
27 [trivsellow.pdf](https://dcum.dk/media/2107/dcum-rapport-elevernes-trivsellow.pdf) (2017).
- 28  
29 66. Tennant, R. *et al.* The Warwick-Edinburgh Mental Well-being Scale (WEMWBS): development  
30 and UK validation. *Health Qual. Life Outcomes* **5**, 63 (2007).
- 31  
32 67. Thomas, S. D., Hathaway, D. K. & Arheart, K. L. Face Validity. *West. J. Nurs. Res.* **14**, 109–112  
33 (1992).
- 34  
35 68. Lene Winther Ringgaard, Clara Heinze, Nicklas Bunck Sørensen Andersen, Gro Inge Lemcke  
36 Hansen, Anneke Vang Hjort, Charlotte Demant Klinker. *UNG19 - Sundhed og trivsel på erhvervsuddannelser*  
37 *2019 [The Health and Wellbeing survey in Danish vocational education and training]*. (2020).
- 38  
39 69. Rapley, T. *et al.* Improving the normalization of complex interventions: part 1 - development  
40 of the NoMAD instrument for assessing implementation work based on normalization process theory (NPT).  
41 *BMC Med. Res. Methodol.* **18**, (2018).
- 42  
43 70. Finch, T. L. *et al.* Improving the normalization of complex interventions: part 2 - validation of  
44 the NoMAD instrument for assessing implementation work based on normalization process theory (NPT).  
45 *BMC Med. Res. Methodol.* **18**, (2018).
- 46  
47 71. Rozema, A. D., Mathijssen, J. J. P., van Oers, H. A. M. & Jansen, M. W. J. Evaluation of the  
48 Process of Implementing an Outdoor School Ground Smoking Ban at Secondary Schools. *J. Sch. Health* **88**,  
49 859–867 (2018).
- 50  
51  
52  
53  
54  
55  
56  
57  
58  
59  
60

- 1  
2  
3  
4 72. Saluja, K. *et al.* School environment assessment tools to address behavioural risk factors of  
5 non-communicable diseases: A scoping review. *Prev. Med. Rep.* **10**, 1–8 (2018).  
6  
7  
8 73. Mukumbang, F. C., Marchal, B., Van Belle, S. & van Wyk, B. Using the realist interview  
9 approach to maintain theoretical awareness in realist studies. *Qual. Res.* 146879411988198 (2019)  
10 doi:10.1177/1468794119881985.  
11  
12 74. Floyd, F. J. & Widaman, K. F. Factor analysis in the development and refinement of clinical  
13 assessment instruments. *Psychol. Assess.* **7**, 286–299 (1995).  
14  
15 75. Kirkwood, B. R., Sterne, J. A. C. & Kirkwood, B. R. *Essential medical statistics*. (Blackwell  
16 Science, 2003).  
17  
18 76. Ford, J. A. *et al.* Access to primary care for socio-economically disadvantaged older people in  
19 rural areas: exploring realist theory using structural equation modelling in a linked dataset. *BMC Med. Res.*  
20 *Methodol.* **18**, (2018).  
21  
22 77. Ravn, R. Testing mechanisms in large-N realistic evaluations. *Evaluation* **25**, 171–188 (2019).  
23  
24 78. Jagosh, J. Retroductive theorizing in Pawson and Tilley’s applied scientific realism. *J. Crit.*  
25 *Realism* **19**, 121–130 (2020).  
26  
27 79. Meyer, S. B. & Lunnay, B. The Application of Abductive and Retroductive Inference for the  
28 Design and Analysis of Theory-Driven Sociological Research. *Sociol. Res. Online* **18**, 86–96 (2013).  
29  
30 80. Bonell, C., Jamal, F., Melendez-Torres, G. J. & Cummins, S. ‘Dark logic’: theorising the harmful  
31 consequences of public health interventions. *J. Epidemiol. Community Health* **69**, 95–98 (2015).  
32  
33  
34  
35  
36  
37  
38  
39  
40  
41  
42  
43  
44  
45  
46  
47  
48  
49  
50  
51  
52  
53  
54  
55  
56  
57  
58  
59  
60



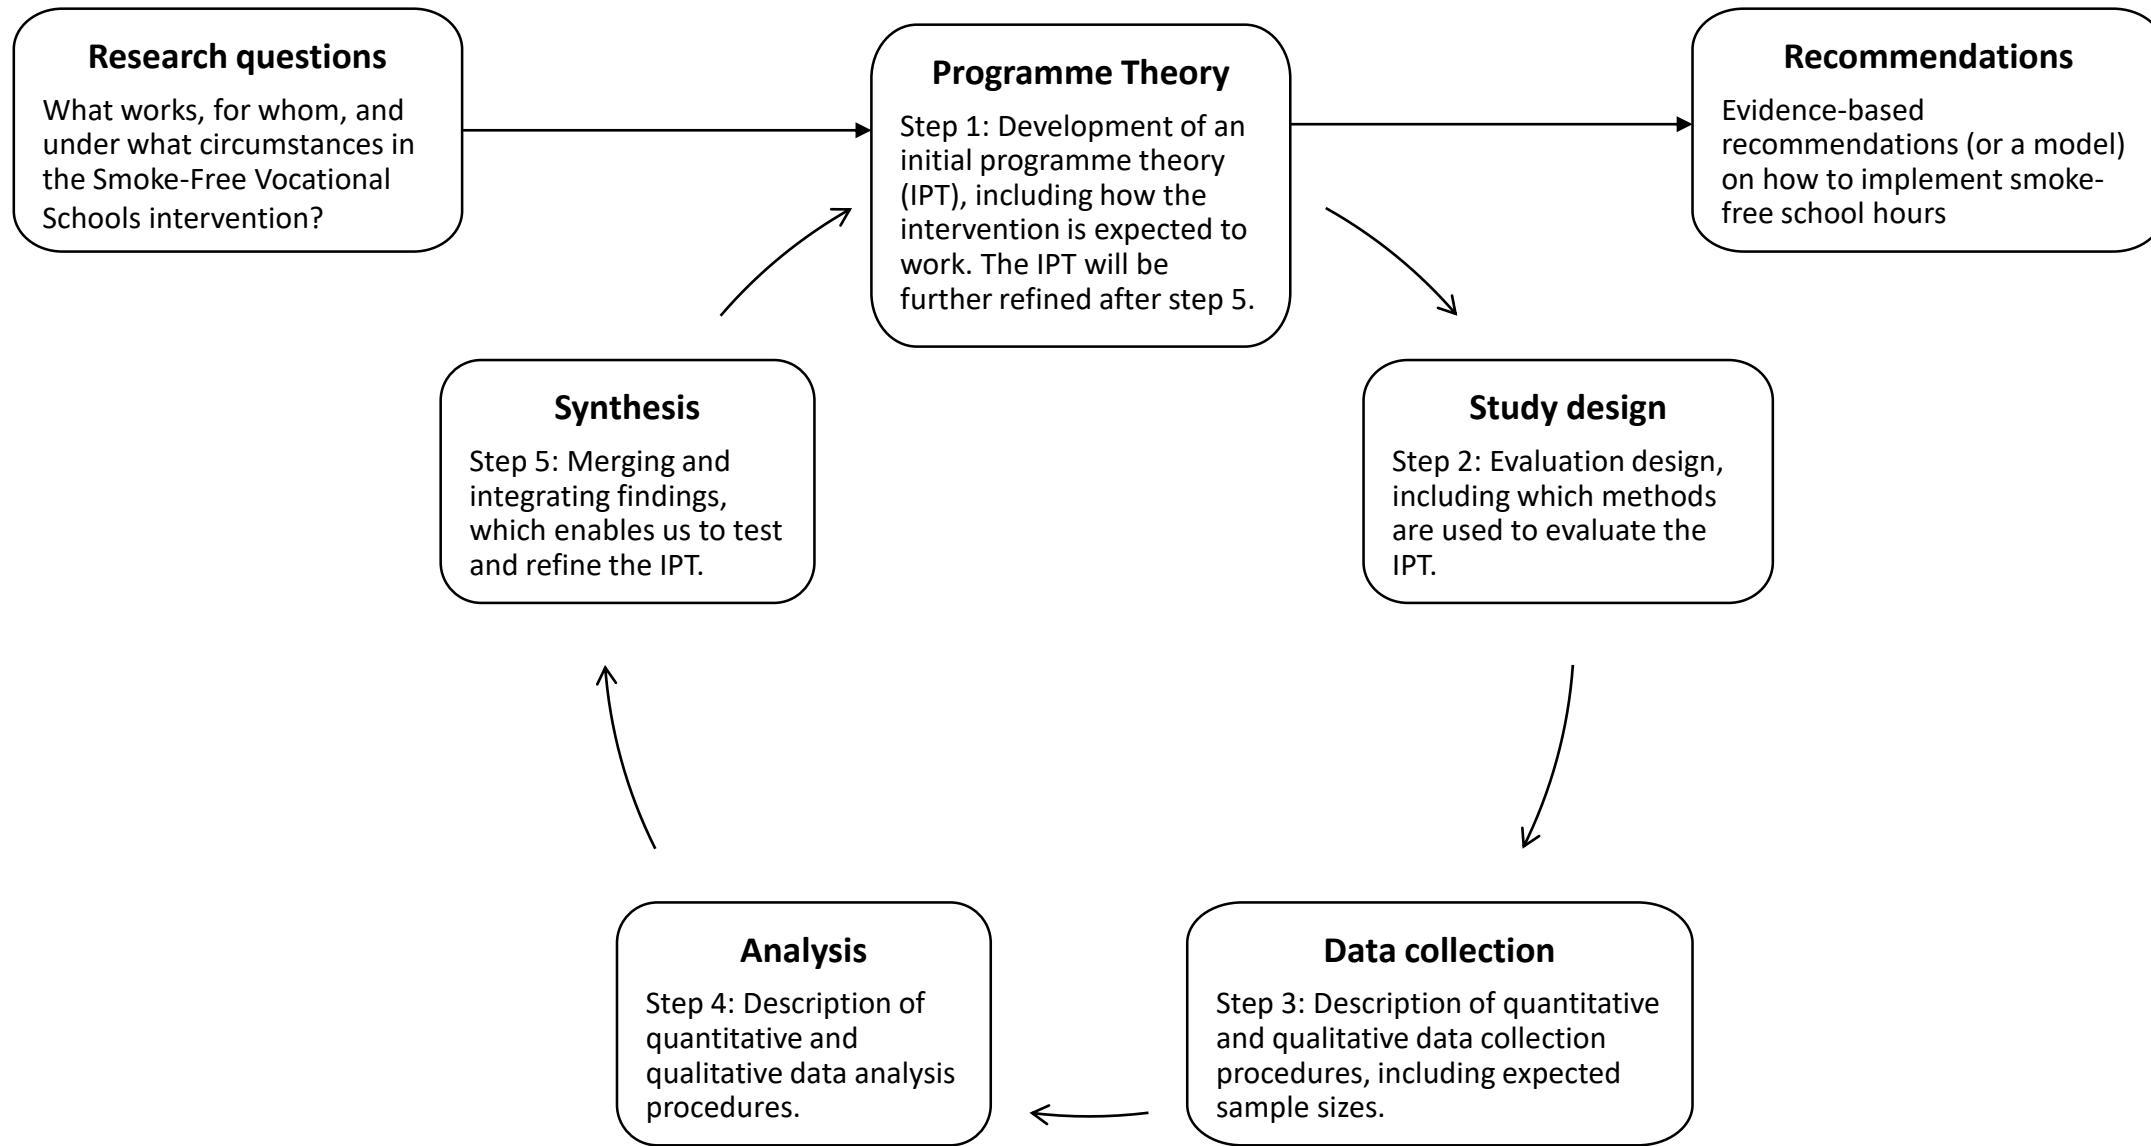

1  
2  
3  
4  
5  
6  
7  
8  
9  
10  
11  
12  
13  
14  
15  
16  
17  
18  
19  
20  
21  
22  
23  
24  
25  
26  
27  
28  
29  
30  
31  
32  
33  
34  
35  
36  
37  
38  
39  
40  
41

# INPUTS

# ACTIVITIES

# OUTPUTS

# MECHANISMS OF CHANGE

# OUTCOMES

# IMPACT

BMJ Open

Page 24 of 28

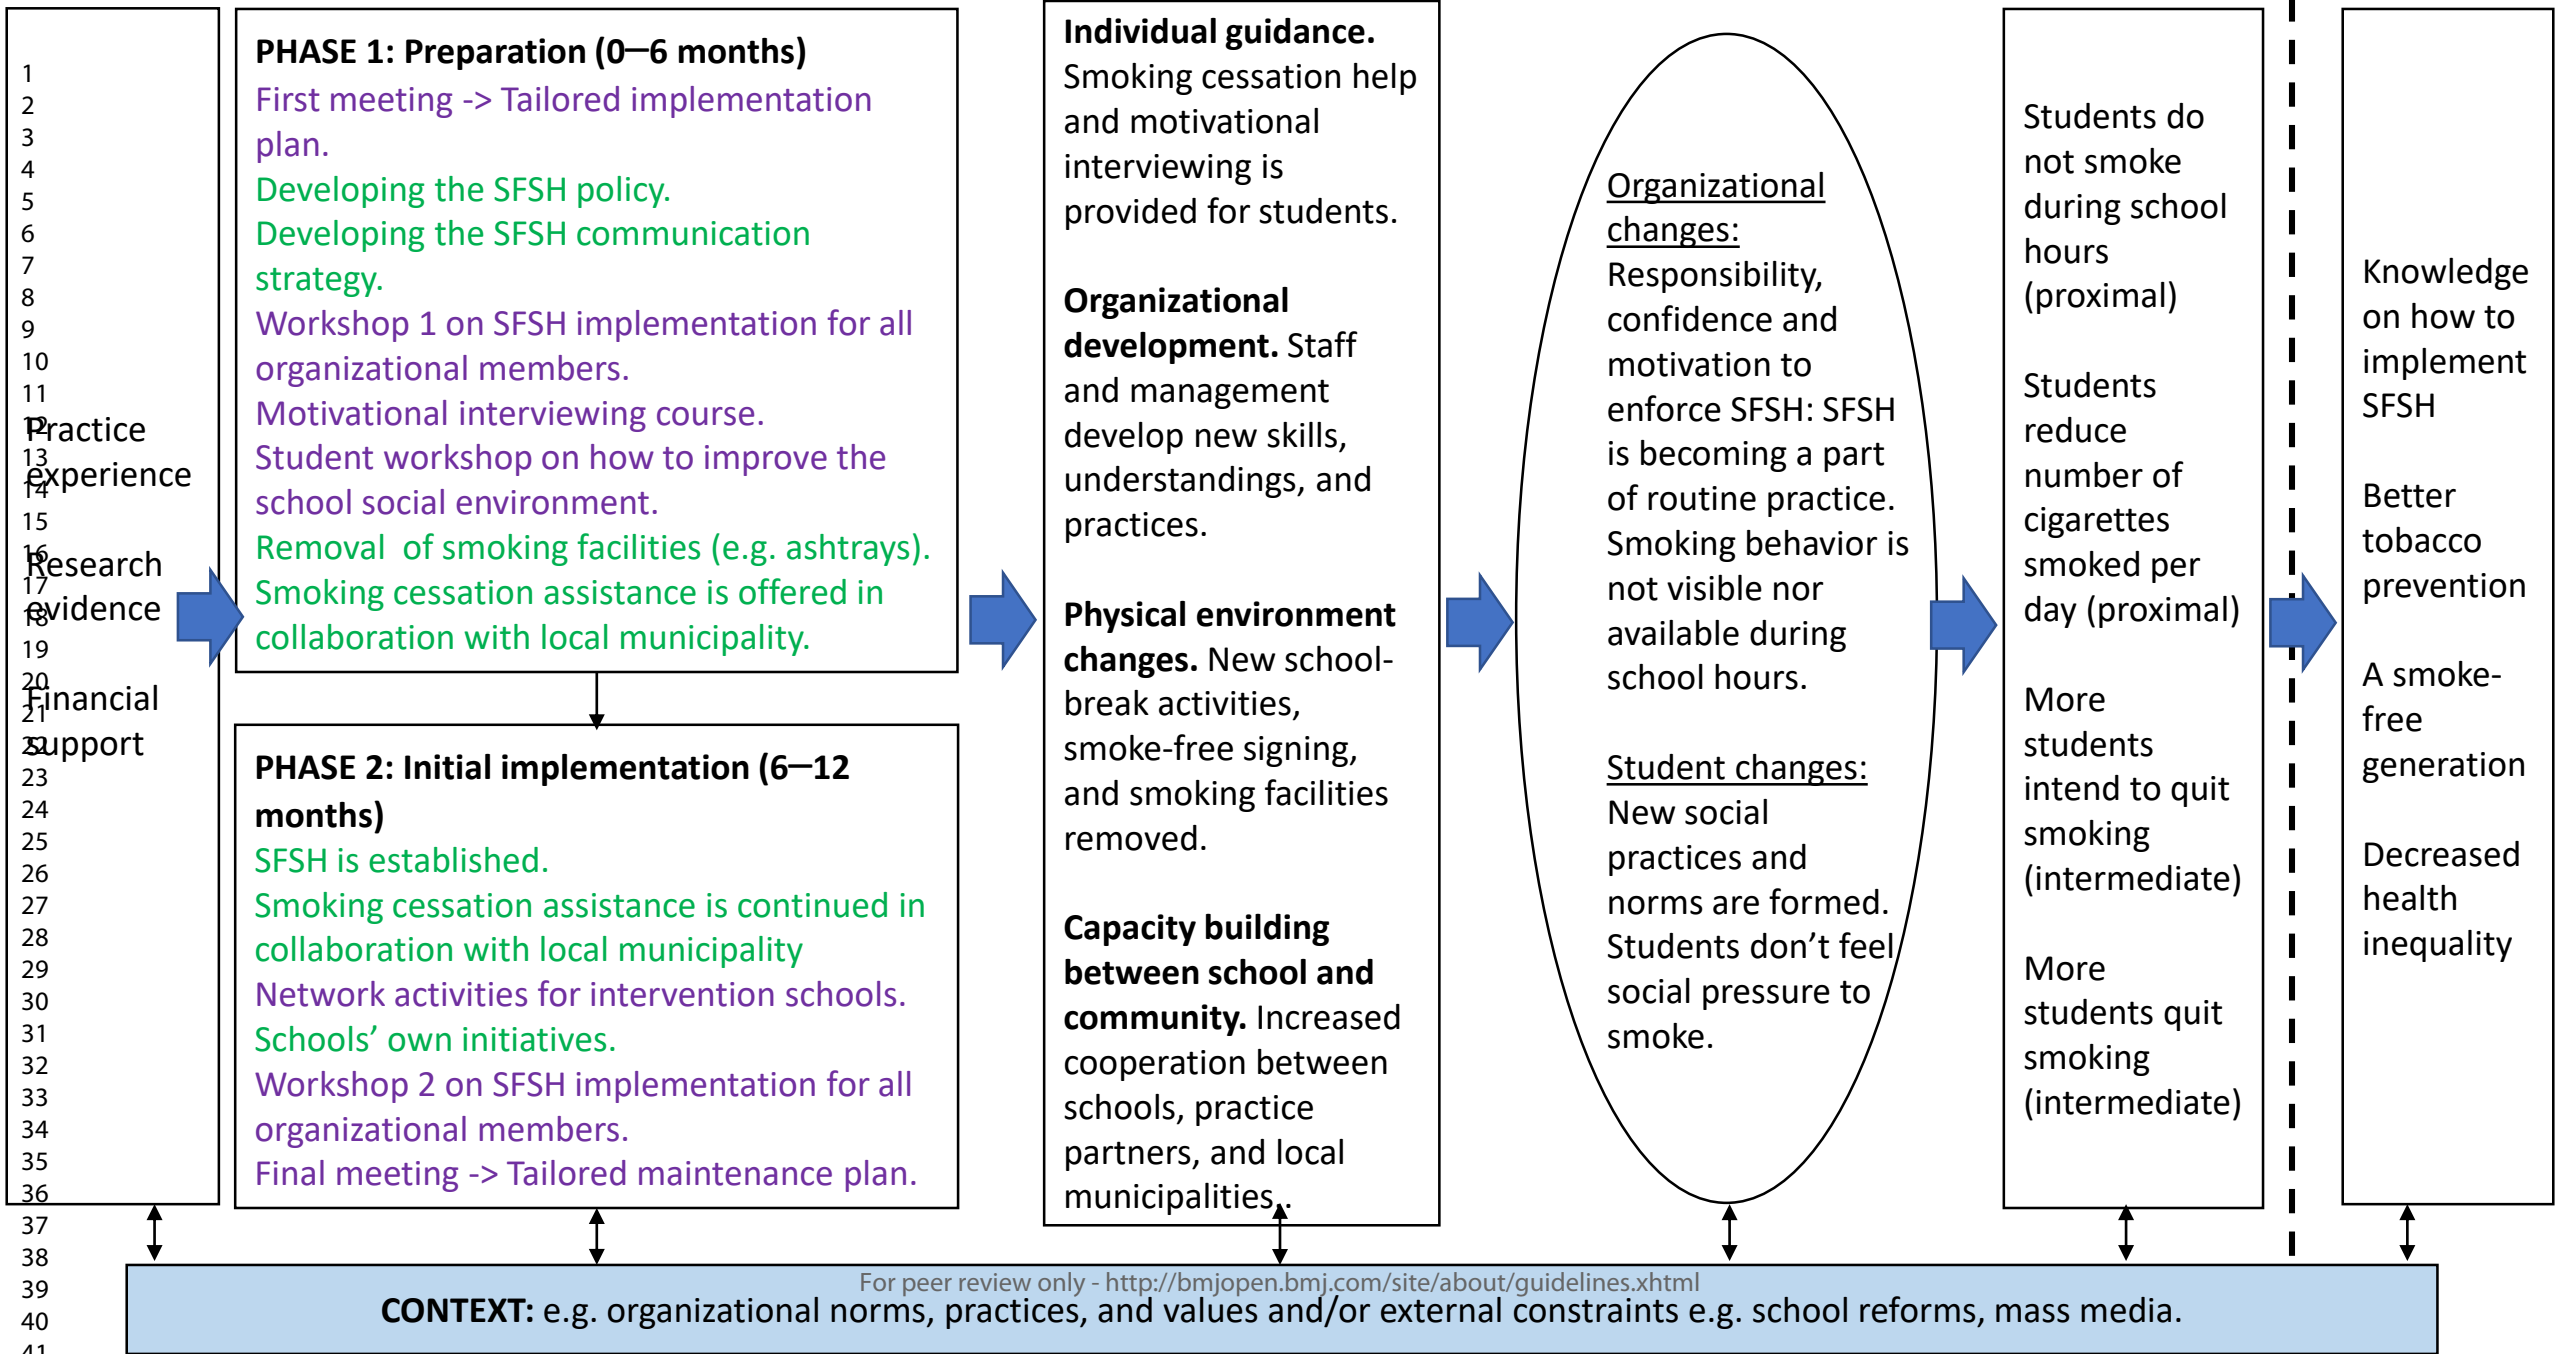

1  
2  
3  
4  
5  
6  
7  
8  
9  
10  
11  
12  
13  
14  
15  
16  
17  
18  
19  
20  
21  
22  
23  
24  
25  
26  
27  
28  
29  
30  
31  
32  
33  
34  
35  
36  
37  
38  
39  
40  
41

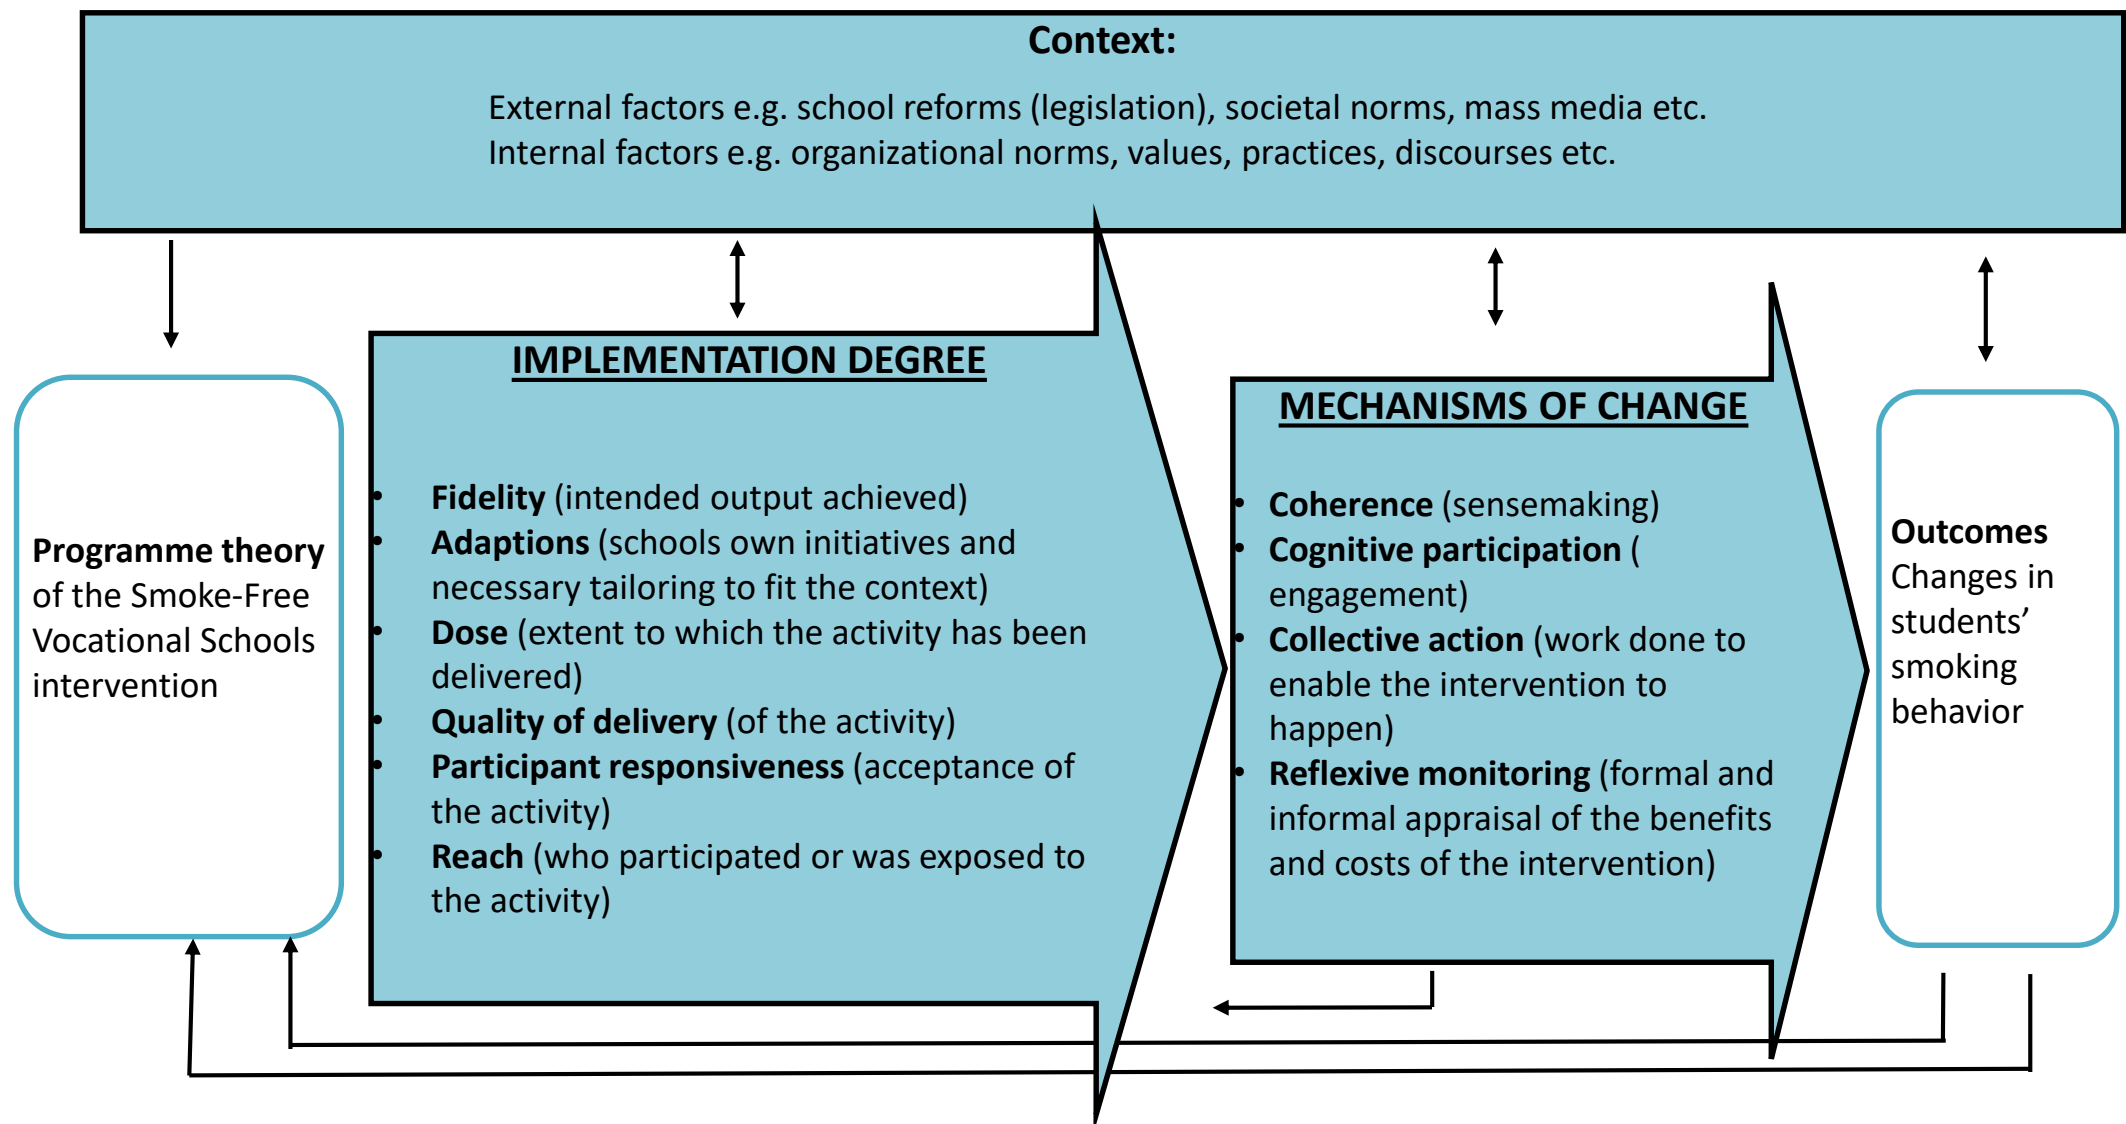

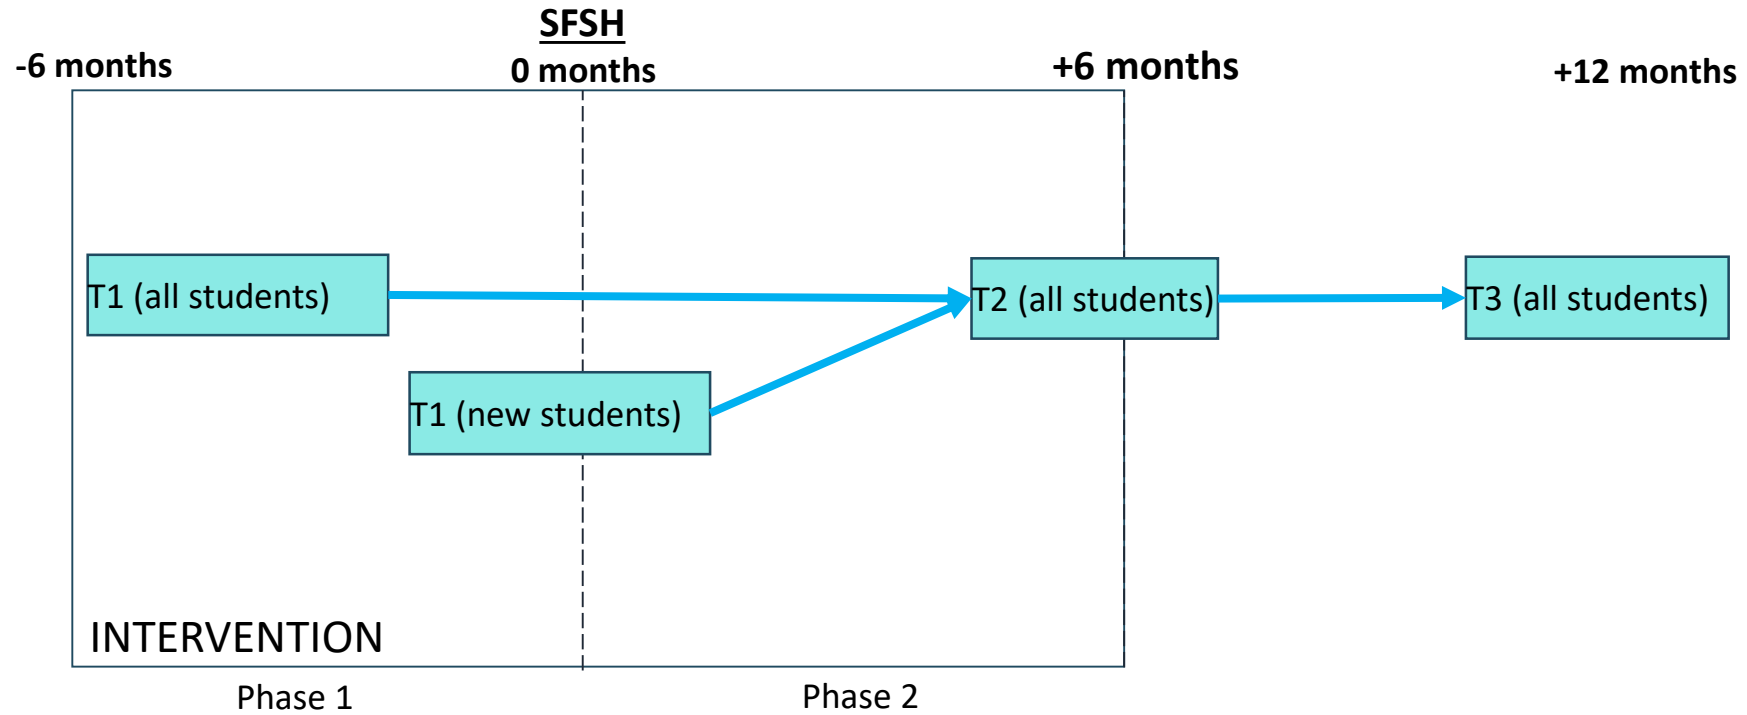

**Supplementary File 1: Operationalization of data collection in the process evaluation (implementation degree and mechanisms of change) and the outcomes evaluation**

|                              | Concept                    | Operationalization                                                                                                                                                         | Data collection                                                                                         |
|------------------------------|----------------------------|----------------------------------------------------------------------------------------------------------------------------------------------------------------------------|---------------------------------------------------------------------------------------------------------|
| <b>Implementation degree</b> |                            |                                                                                                                                                                            |                                                                                                         |
| Organizational development   | Fidelity                   | If the workshops and course has resulted in a shared smoke-free school hours understanding and new skills to support students dealing with not smoking during school hours | Staff survey 1; Staff survey 2                                                                          |
|                              | Adaptions                  | Context-specific adjustments and initiatives                                                                                                                               | Project coordinator survey 2; Facilitator questionnaire (NGOs)                                          |
|                              | Dose                       | Extent to which new learnings from workshops and skills from course are being used at school                                                                               | Staff survey 1; Staff survey 2                                                                          |
|                              | Quality of delivery        | Organization of new learnings and skills at school                                                                                                                         | Staff survey 1; Staff survey 2                                                                          |
|                              | Participant responsiveness | Attitudes towards workshops and course                                                                                                                                     | Staff survey 1; Staff survey 2                                                                          |
|                              | Reach                      | For whom is the component implemented (sub-group analysis)                                                                                                                 | Staff survey 1; Staff survey 2                                                                          |
| Physical environment changes | Fidelity                   | If new school-break activities and smoke-free-signing has been established, and smoking facilities removed                                                                 | Project coordinator survey 2                                                                            |
|                              | Adaptions                  | Context-specific adjustments and initiatives                                                                                                                               | Project coordinator survey 2; structured observations on school grounds; Project coordinator interviews |
|                              | Dose                       | Extent to which school-break activities and smoke-free signing is known to students                                                                                        | Student survey 2                                                                                        |
|                              | Quality of delivery        | Extent to which new school-break activities are being used by students and smoke-free signing has a prominent position                                                     | Student survey 2; structured observations on school grounds                                             |
|                              | Participant responsiveness | Attitudes towards workshops new school-break activities and smoke-free-signing                                                                                             | Student survey 2                                                                                        |
|                              | Reach                      | For whom is the component implemented (sub-group analysis)                                                                                                                 | Student survey 2                                                                                        |
| Individual guidance          | Fidelity                   | If the school offers smoking cessation help or other help for students to cope with smoke-free school hours                                                                | Project coordinator survey 2                                                                            |
|                              | Adaptions                  | Context-specific adjustments and initiatives                                                                                                                               | Project coordinator survey 1; Project coordinator survey 2; Project coordinator interview               |
|                              | Dose                       | Number of smoking cessation courses delivered and number of students attending the courses                                                                                 | Project coordinator survey 1; Project coordinator survey 2                                              |
|                              | Quality of delivery        | Extent to which students know which support to cope with smoke-free school hours is provided                                                                               | Student survey 2                                                                                        |
|                              | Participant responsiveness | Attitudes towards help to cope with smoke-free school hours and attitudes towards attending smoking cessation courses                                                      | Student survey 2                                                                                        |

1  
2  
3  
4  
5  
6  
7  
8  
9  
10  
11  
12  
13  
14  
15  
16  
17  
18  
19  
20  
21  
22  
23  
24  
25  
26  
27  
28  
29  
30  
31  
32  
33  
34  
35  
36  
37  
38  
39  
40  
41  
42  
43  
44  
45  
46  
47  
48  
49  
50  
51  
52  
53  
54  
55  
56  
57  
58  
59  
60

|                                                                                                                                                                              | Reach                      | For whom is the component implemented (sub-group analysis)                                                                                                                                                                                                                                                                                                                                                 | Student survey 2                                                                            |
|------------------------------------------------------------------------------------------------------------------------------------------------------------------------------|----------------------------|------------------------------------------------------------------------------------------------------------------------------------------------------------------------------------------------------------------------------------------------------------------------------------------------------------------------------------------------------------------------------------------------------------|---------------------------------------------------------------------------------------------|
| Capacity building between the school and community                                                                                                                           | Fidelity                   | If the relationship between school and NGOs, and school and municipality has been strengthened                                                                                                                                                                                                                                                                                                             | Project coordinator survey 2                                                                |
|                                                                                                                                                                              | Adaptions                  | Context-specific adjustments and initiatives                                                                                                                                                                                                                                                                                                                                                               | Project coordinator survey 2; Project coordinator interview                                 |
|                                                                                                                                                                              | Dose                       | Extent to which the school has discussed smoke-free school hours implementation with NGOs and local municipality                                                                                                                                                                                                                                                                                           | Project coordinator survey 2                                                                |
|                                                                                                                                                                              | Quality of delivery        | Extent to which the schools has experienced support from the NGOs and local municipality                                                                                                                                                                                                                                                                                                                   | Project coordinator survey 2                                                                |
|                                                                                                                                                                              | Participant responsiveness | Attitudes towards integrating external resources in smoke-free school hours implementation                                                                                                                                                                                                                                                                                                                 | Staff survey 2                                                                              |
|                                                                                                                                                                              | Reach                      | For whom is the component implemented (sub-group analysis)                                                                                                                                                                                                                                                                                                                                                 | Facilitator questionnaire (NGOs)                                                            |
| Smoke-free school hours implementation                                                                                                                                       | Fidelity                   | If smoking is allowed during school hours and extent to which students experience smoking during school-hours                                                                                                                                                                                                                                                                                              | Staff survey 2; Staff survey 3; Student survey 2                                            |
|                                                                                                                                                                              | Adaptions                  | Context-specific adjustments in sanctioning and enforcement procedures and practice                                                                                                                                                                                                                                                                                                                        | Staff survey 2; Staff survey 3; Project coordinator interview                               |
|                                                                                                                                                                              | Dose                       | Extent to which students know the policy and extent of smoking visibility                                                                                                                                                                                                                                                                                                                                  | Student survey 2, Staff survey 2; Staff survey 3; Structured observations on school grounds |
|                                                                                                                                                                              | Quality of delivery        | Frequency and manner/method of enforcement                                                                                                                                                                                                                                                                                                                                                                 | Staff survey 2; Staff survey 3                                                              |
|                                                                                                                                                                              | Participant responsiveness | Attitudes towards the policy and whether staff experience the policy as a normal part of their work                                                                                                                                                                                                                                                                                                        | Student survey 2; Staff survey 2; Staff survey 3                                            |
|                                                                                                                                                                              | Reach                      | For whom is the component implemented (sub-group analysis)                                                                                                                                                                                                                                                                                                                                                 | Student survey 2; Staff survey 2; Staff survey 3                                            |
| <b>Mechanisms of change</b>                                                                                                                                                  |                            |                                                                                                                                                                                                                                                                                                                                                                                                            |                                                                                             |
| Interactions between the intervention and context-mechanisms i.e. reasoning and behavior among participants, constrained by e.g. organizational norms, values and discourses | Coherence                  | If and why smoke-free school hours makes sense given the situation the school currently face. Extant to which there's a shared understanding about the policy and the organizational members see the potential value of smoke-free school hours.                                                                                                                                                           | Management interview; Project coordinator interview;                                        |
|                                                                                                                                                                              | Cognitive participation    | If and how there's been established a community of practice around smoke-free school hours, if there's key people driving the implementation forward or the contrary and who. If it is seen as a legitimate part of the schoolwork and if there's been established new practices. Extent to which the organizational members are open to change their daily routines to work with smoke-free school hours. | Teacher focus groups; Staff survey 2; Staff survey 3                                        |
|                                                                                                                                                                              | Collective action          | If and how smoke-free school hours in enacted as part of routine practice including management practices e.g. how is the work organized and which resources are in place to support the implementation. To what extent the work can be integrated into the everyday school practices and whether people involved has sufficient skills and confidence in work with smoke-free school hours.                |                                                                                             |
|                                                                                                                                                                              | Reflexive monitoring       | If and how smoke-free school hours affect the everyday school life. Formel and informal appraisal procedures and reconfiguration.                                                                                                                                                                                                                                                                          |                                                                                             |

| <b>Sub-study 3: Outcomes</b> |                            |                                                                        |                  |
|------------------------------|----------------------------|------------------------------------------------------------------------|------------------|
| Baseline                     | Primary outcome measure    | Smoking during school hours (Y/N)                                      | Student survey 1 |
|                              | Secondary outcome measures | Number of cigarettes smoked per day, Intention to quit, Smoking status |                  |
|                              | Covariates                 | Age, gender, SES etc.                                                  |                  |
| Follow-up 1                  | Primary outcome measure    | Smoking during school hours (Y/N)                                      | Student survey 2 |
|                              | Secondary outcome measures | Number of cigarettes smoked per day, Intention to quit, Smoking status |                  |
|                              | Covariates                 | Age, gender, SES etc.                                                  |                  |
| Follow-up 2                  | Primary outcome measure    | Smoking during school hours (Y/N)                                      | Student survey 3 |
|                              | Secondary outcome measures | Number of cigarettes smoked per day, Intention to quit, Smoking status |                  |
|                              | Covariates                 | Age, gender, SES etc.                                                  |                  |

# BMJ Open

## Programme theory and realist evaluation of the 'Smoke-Free Vocational Schools' research and intervention project: a study protocol

|                                 |                                                                                                                                                                                                                                                                                                                                                                                                                                                                                                                                                                                                                                                                                           |
|---------------------------------|-------------------------------------------------------------------------------------------------------------------------------------------------------------------------------------------------------------------------------------------------------------------------------------------------------------------------------------------------------------------------------------------------------------------------------------------------------------------------------------------------------------------------------------------------------------------------------------------------------------------------------------------------------------------------------------------|
| Journal:                        | <i>BMJ Open</i>                                                                                                                                                                                                                                                                                                                                                                                                                                                                                                                                                                                                                                                                           |
| Manuscript ID                   | bmjopen-2020-042728.R1                                                                                                                                                                                                                                                                                                                                                                                                                                                                                                                                                                                                                                                                    |
| Article Type:                   | Protocol                                                                                                                                                                                                                                                                                                                                                                                                                                                                                                                                                                                                                                                                                  |
| Date Submitted by the Author:   | 01-Nov-2020                                                                                                                                                                                                                                                                                                                                                                                                                                                                                                                                                                                                                                                                               |
| Complete List of Authors:       | Hjort, Anneke; Steno Diabetes Center Copenhagen, Health Promotion Research; University of Southern Denmark, National Institute of Public Health<br>Christiansen, Tenna; Danish Cancer Society, Cancer Prevention & Information<br>Stage, Maria; Danish Cancer Society, Cancer Prevention & Information<br>Rasmussen, Kathrine; Danish Heart Foundation , Prevention<br>Pisinger, Charlotta; University of Copenhagen, Center for Clinical Research and Prevention; Danish Heart Foundation , Prevention<br>Tjørnhøj-Thomsen, Tine; University of Southern Denmark, National Institute of Public Health<br>Klinker, Charlotte; Steno Diabetes Center Copenhagen, Health Promotion Research |
| <b>Primary Subject Heading</b>: | Public health                                                                                                                                                                                                                                                                                                                                                                                                                                                                                                                                                                                                                                                                             |
| Secondary Subject Heading:      | Smoking and tobacco, Public health, Health policy                                                                                                                                                                                                                                                                                                                                                                                                                                                                                                                                                                                                                                         |
| Keywords:                       | PUBLIC HEALTH, Health policy < HEALTH SERVICES ADMINISTRATION & MANAGEMENT, QUALITATIVE RESEARCH, Protocols & guidelines < HEALTH SERVICES ADMINISTRATION & MANAGEMENT                                                                                                                                                                                                                                                                                                                                                                                                                                                                                                                    |
|                                 |                                                                                                                                                                                                                                                                                                                                                                                                                                                                                                                                                                                                                                                                                           |

SCHOLARONE™  
Manuscripts





I, the Submitting Author has the right to grant and does grant on behalf of all authors of the Work (as defined in the below author licence), an exclusive licence and/or a non-exclusive licence for contributions from authors who are: i) UK Crown employees; ii) where BMJ has agreed a CC-BY licence shall apply, and/or iii) in accordance with the terms applicable for US Federal Government officers or employees acting as part of their official duties; on a worldwide, perpetual, irrevocable, royalty-free basis to BMJ Publishing Group Ltd ("BMJ") its licensees and where the relevant Journal is co-owned by BMJ to the co-owners of the Journal, to publish the Work in this journal and any other BMJ products and to exploit all rights, as set out in our [licence](#).

The Submitting Author accepts and understands that any supply made under these terms is made by BMJ to the Submitting Author unless you are acting as an employee on behalf of your employer or a postgraduate student of an affiliated institution which is paying any applicable article publishing charge ("APC") for Open Access articles. Where the Submitting Author wishes to make the Work available on an Open Access basis (and intends to pay the relevant APC), the terms of reuse of such Open Access shall be governed by a Creative Commons licence – details of these licences and which [Creative Commons](#) licence will apply to this Work are set out in our licence referred to above.

Other than as permitted in any relevant BMJ Author's Self Archiving Policies, I confirm this Work has not been accepted for publication elsewhere, is not being considered for publication elsewhere and does not duplicate material already published. I confirm all authors consent to publication of this Work and authorise the granting of this licence.

# Programme theory and realist evaluation of the 'Smoke-Free Vocational Schools' research and intervention project: a study protocol

Anneke Vang Hjort<sup>1,2</sup>, Tenna Børsting Christiansen<sup>3</sup>, Maria Stage<sup>3</sup>, Kathrine Højlund Rasmussen<sup>4</sup>, Charlotta Pisinger<sup>4,5</sup>, Tine Tjørnhøj-Thomsen<sup>2</sup> & Charlotte Demant Klinker<sup>1</sup>

1: Steno Diabetes Center Copenhagen, Health Promotion Research, Niels Steensens Vej 6, 2820 Gentofte, Denmark

2: The University of Southern Denmark, The National Institute of Public Health, Studiestræde 6, 1455 Copenhagen K, Denmark

3: The Danish Cancer Society, Cancer Prevention & Information, Strandboulevarden 49, 2100 Copenhagen, Denmark

4: The Danish Heart Foundation, Prevention, Vognmagergade 7, 1120 Copenhagen K, Denmark

5: University of Copenhagen, Center for Clinical Research and Prevention, Nordre Fasanvej 57, 2000 Frederiksberg, Denmark

---

Anneke Vang Hjort: [anneke.vang.hjort@regionh.dk](mailto:anneke.vang.hjort@regionh.dk)

Tenna Børsting Christiansen: [tennabc@cancer.dk](mailto:tennabc@cancer.dk)

Maria Stage: [marsta@cancer.dk](mailto:marsta@cancer.dk)

Kathrine Højlund Rasmussen: [kath86@live.com](mailto:kath86@live.com)

Charlotta Pisinger: [charlotta.pisinger@regionh.dk](mailto:charlotta.pisinger@regionh.dk)

Tine Tjørnhøj-Thomsen: [titt@sdu.dk](mailto:titt@sdu.dk)

Charlotte Demant Klinker: [charlotte.demant.klinker@regionh.dk](mailto:charlotte.demant.klinker@regionh.dk)

Word count: 4132 words excluding title page, abstract, figures and tables, declarations, and references.

## ABSTRACT

**Introduction:** Smoke-free school hours (SFSH) entails a smoking ban during school hours and might be an effective intervention to reduce the high smoking prevalence in vocational schools. For SFSH to be effective, the policy must be adequately implemented and enforced; this challenge for schools constitutes a research gap. The ‘Smoke-Free Vocational Schools’ research and intervention project has been developed to facilitate schools’ implementation of SFSH. It is scheduled to run from 2018–2022, with SFSH being implemented in 11 Danish vocational schools. This study protocol describes the intervention project and evaluation design research and intervention project.

**Methods and analysis:** The intervention project aims to develop an evidence-based model for implementing SFSH in vocational schools and similar settings. The project is developed in a collaboration between research and practice. Two public health NGOs are responsible for delivering the intervention activities in schools, while the research partner evaluates what works, for whom, and under what circumstances. The intervention lasts one year per school, targeting different socioecological levels. During the first six months, activities are delivered to stimulate organisational readiness to implement SFSH. Then, SFSH is established, and during the next six months, activities are delivered to stimulate implementation of SFSH into routine practice. The epistemological foundation is realistic evaluation. The evaluation focuses on both implementation and outcomes. Process evaluation will determine the level of implementation and explore what hinders or enables SFSH becoming part of routine practice using qualitative and quantitative methods. Outcomes evaluation will quantitatively assess the intervention’s effectiveness, with the primary outcome measure being changes in smoking during school-hours.

**Ethics and dissemination:** Informed consent will be obtained from study participants according to the GDPR and Danish data protection law. The study adheres to Danish ethics procedures. Study findings will be disseminated at conferences and further published in open-access peer-reviewed journals.

### Strengths and limitations:

- The study draws on realistic evaluation and aims to answer both research and practice needs by generating new application-oriented knowledge on how to implement smoke-free school hours in vocational schools and similar settings.
- The study includes both implementation/process evaluation and outcomes evaluation in a unified multi-methods study design.
- The intervention has been developed in a joint venture between research and practice that emphasises including practice-based experience and research evidence, which may generate high external validity and more sustainable implementation practices.
- The study seeks to assess outcomes in a pretest-posttest study design without using control schools, which is appropriate in realistic evaluation but limits internal validity in relation to determining the intervention’s effectiveness.

## INTRODUCTION

From August 2021, a school tobacco policy (STP) of smoke-free school hours (SFSH) is expected to be ratified in all Danish educational institutions with at least one student aged under 18. The policy basically stipulates a smoking ban for students during school hours – both inside and outside school

1  
2  
3  
4 grounds. An expanded definition of SFSH also bans smoking by school staff, managers and visitors  
5 (smoke-free work hours). Additionally, SFSH might include all tobacco-related products (e.g.  
6 cigarettes, vapers, and snuff). SFSH is an expansion of traditional STPs, which do not prohibit  
7 smoking outside school grounds.<sup>1</sup> The rationale is the same: restricting smoking behaviour as a means  
8 to prevent exposure to second-hand smoke, smoking initiation, and smoking continuation among  
9 adolescents and young adults.<sup>2,3</sup> Restricting smoking behaviour can further be linked to political  
10 denormalization strategies aiming to make the future smoke-free: a tobacco endgame.<sup>4</sup> Evidence  
11 about SFSH is sparse, but some researchers<sup>5</sup> suggest that it might be more effective than traditional  
12 STPs, which have been shown to relocate smoking to just outside school premises (e.g. at the school  
13 entrance), and therefore do not remove smoking visibility.<sup>5,6</sup> Additionally, traditional STPs can have  
14 adverse effects on students with lower socioeconomic status (SES), (lower odds of anti-smoking  
15 social beliefs)<sup>7</sup>, which suggest that SFSH might be a more appropriate strategy in schools with low  
16 SES groups, such as vocational schools.

17  
18  
19  
20  
21  
22  
23  
24  
25  
26  
27  
28 In Denmark, vocational education and training (VET) is a short, practical upper-secondary  
29 education for a specific service or industry, such as hairdresser, carpenter, office assistant, or chef. It  
30 is characterised by a combination of traditional in-school education and out-of-school apprenticeship  
31 in the future workplace. Danish vocational students have low SES backgrounds<sup>8</sup> and are  
32 overrepresented in smoking behaviour: 29% smoke daily, compared to 9% in general upper-  
33 secondary education.<sup>9,10</sup> The average vocational student age is 24, but as 14% of these students are  
34 aged 15–17,<sup>11</sup> the SFSH law will apply to Danish vocational schools. As such, the law has  
35 considerable health-promoting potential: it may not only reduce smoking within a vulnerable  
36 population group setting (vocational schools) but also contribute towards decreasing health  
37 inequality.<sup>12</sup> However, policies which are not well-implemented will not improve health.<sup>13–16</sup> We  
38 conceptualise the implementation of SFSH as a school organisational process with the end-goal of  
39 incorporating the policy into routine practice.<sup>17</sup> Staff and managers must enact and enforce the policy  
40 as part of their professional duties, and students must experience the policy as an accepted part of  
41 their everyday school life. Hence, enforcement is a significant task of organisational  
42 implementation.<sup>16,18–20</sup> Despite legislation imposing STPs in many secondary schools across Europe,  
43 they are often poorly implemented and enforced.<sup>21–24</sup>

44  
45  
46  
47  
48  
49  
50  
51  
52  
53  
54  
55  
56 Three reviews have systematised decades of evidence related to STP implementation. The 2014  
57 systematic review by Galanti et al.<sup>15</sup> identified implementation components that improve STPs'  
58  
59  
60

1  
2  
3  
4 impact on student smoking behaviour (e.g. strict and consistent enforcement). However, the authors  
5 also showed that most studies do not measure implementation fidelity and that enforcement is  
6 inconsistently operationalised across studies.<sup>15</sup> Two realist reviews,<sup>5,16</sup> as part of the SILNE-R project  
7 (2015–2018),<sup>25</sup> yield prominent new insights into the functioning of STPs. The first shows how STPs'  
8 implementation and comprehensiveness affects students' beliefs and behaviour: for example, if  
9 smoking is not visible during school hours, students feel less pressure to conform to others' smoking  
10 behaviour.<sup>5</sup> The second shows that staff enforcement depends on whether they 1) believe that STP  
11 enforcement is their role and duty, 2) have confidence to deal with students' negative responses when  
12 enforcing the rules, and 3) experience enforcement having a positive impact on students.<sup>16</sup> Other  
13 recent studies<sup>26–28</sup> have explored which practices facilitate or hinder adopting SFSH; one key finding  
14 is that schools should develop a shared understanding about the policy being part of their jurisdiction  
15 prior to implementation).<sup>26–28</sup> Seen together, the studies point towards important elements for schools  
16 to consider when implementing SFSH, but do not provide knowledge about what activities and  
17 processes can stimulate better implementation. In other words, most studies focus on understanding  
18 existing STPs rather than generating new knowledge about how to facilitate implementation. The  
19 latter might only be possible using interventionist study designs. One intervention study provides an  
20 important measure of STP implementation fidelity.<sup>29</sup> To the best of our knowledge, however, no  
21 intervention studies have examined how to stimulate or measure the process of implementing SFSH  
22 into routine practice. As such, it remains unclear how to best support, stimulate, and measure the  
23 implementation of SFSH.  
24  
25  
26  
27  
28  
29  
30  
31  
32  
33  
34  
35  
36  
37  
38

39 To address the identified research gap, we developed the 'Smoke-Free Vocational Schools'  
40 intervention project, which aims to facilitate implementing SFSH in vocational schools and to  
41 generate new knowledge about the implementation and effectiveness of SFSH. The intervention takes  
42 place in 11 Danish vocational schools from 2018–2022.  
43  
44  
45  
46

### 47 **Realistic evaluation**

48 Realistic evaluation (RE) is the epistemological foundation of the evaluation. Pawson and Tilley  
49 developed the RE approach, arguing that to generate application-oriented knowledge for policy and  
50 practice, it is more useful to address 'what works, for whom and under what circumstances', rather  
51 than evaluating whether an intervention 'works'.<sup>30</sup> According to RE, interventions might generate  
52 different outcomes (O) in different contexts (C) by triggering underlying changes in reasoning and  
53 behaviour among participants – conceptualised as mechanisms (M).<sup>31</sup> As such, interventions may  
54  
55  
56  
57  
58  
59  
60

1  
2  
3  
4 ‘work’ by enabling participants to make different choices, but the choices are always constrained by  
5 a context, such as the organisational norms, values, and discourses that operate in school settings.  
6  
7 ‘Complex intervention’ is used to describe innovations within highly complex and emergent social  
8 systems,<sup>32</sup> such as schools.<sup>33–34</sup> It can be understood in relation to the RE notion of ‘open systems’,  
9 defined by Pawson and Tilley<sup>30</sup> as ‘[T]he acknowledgement that programs are implemented in a  
10 changing and permeable social world, and that program effectiveness may thus be subverted or  
11 enhanced through the unanticipated intrusion of new contexts’ (p. 218). Hence, the overall RE  
12 methodology is to examine  $C + M = O$  relations in complex interventions, known as CMO  
13 configurations.<sup>30</sup>  
14  
15  
16  
17  
18  
19

## 20 **Study aim**

21 In reporting complex interventions, the intervention and evaluation design must be clearly described  
22 to enable replication and synthesis of evidence,<sup>35,36</sup> yet many RE studies inadequately report their  
23 methodological practices.<sup>37–39</sup> Therefore, the aim of this study protocol is two-fold: 1) to describe the  
24 Smoke-Free Vocational Schools intervention, and 2) to present how the intervention is evaluated,  
25 including the study design, specific methods, and theoretical assumptions.  
26  
27  
28  
29  
30  
31

## 32 **METHODS AND ANALYSIS**

33 The overall objective of the Smoke-Free Vocational Schools intervention project is to develop an  
34 evidence-based model for implementing SFSH in Danish vocational schools and comparable settings.  
35 To accomplish the objective, the study examines what works, for whom, and under what  
36 circumstances. RE starts with the development of an initial programme theory (IPT).<sup>39</sup> Programme  
37 theory is theory incarnate, explicitly explaining which context-mechanisms should be triggered  
38 among different actors to produce desired outcomes.<sup>40,41</sup> In relation to the Smoke-Free Vocational  
39 Schools intervention, the IPT represents a hypothesis on how and why to implement SFSH and the  
40 study design is developed to test the hypothesis. We have structured this study protocol following the  
41 steps of the realist research cycle,<sup>39,42</sup> as shown in figure 1. The content was further informed by the  
42 SPIRIT (Standard Protocol Items for Randomized Trials) statement.  
43  
44  
45  
46  
47  
48  
49  
50

51 >> Insert Figure 1 here <<

### 52 **Step 1: Programme theory**

53 The intervention project is a collaboration between research and practice. Two Danish public health  
54 NGOs – the Danish Heart Foundation and the Danish Cancer Society – are practice partners, while  
55 Steno Diabetes Centre Copenhagen is the research partner. The practice partners are responsible for  
56  
57  
58  
59  
60

1  
2  
3  
4 delivering the intervention activities in schools; the research partner is responsible for conducting a  
5 formative evaluation of the implementation processes and outcomes. The research and practice  
6 partners together developed the IPT, and it is part of our method to continually discuss and apply  
7 preliminary research findings as part of the formative evaluation. As such, we follow the proposal of  
8 RE<sup>37</sup> by iteratively testing and developing the programme theory in parallel to new empirical  
9 learnings.  
10  
11  
12  
13  
14

15 The IPT was developed through a workshop where research and practice worked collaboratively. The  
16 practice partners contributed their extensive first-hand experience of implementing tobacco  
17 preventive efforts in different school contexts: for example, the Danish Cancer Society has tailored a  
18 motivational interviewing course to support smoking cessation by upper-secondary school students.  
19 The translation of practice-based experience and ideas into the intervention might increase the  
20 sustainability of implementation practices and improve external validity.<sup>43</sup> The research partner  
21 contributed with evidence on effective tobacco preventive methods in vocational schools, based on  
22 recent research and the results from a qualitative study on facilitators and barriers for implementing  
23 SFSH.<sup>28</sup> At the workshop, we developed a graphic representation of the intervention,<sup>44</sup> including the  
24 short- and long-term outputs, outcomes, and impact expected of different intervention activities  
25 targeting actors within and outside the school. The workshop process also served as a learning and  
26 management tool, as the research and practice partners developed a shared understanding on how the  
27 intervention is expected to produce change, which is crucial in public health interventions.<sup>45</sup>  
28  
29  
30  
31  
32  
33  
34  
35  
36  
37  
38

### 39 The Smoke-Free Vocational Schools intervention

40 The intervention is delivered in two phases, each lasting approximately six months (as shown in figure  
41 2). During phase 1, activities are delivered to stimulate organisational readiness<sup>46</sup> to implement SFSH:  
42 these include preparing staff and managers for their new professional tasks, and establishing new  
43 school-break facilities for students as alternatives to social smoking. At the beginning of phase 2,  
44 SFSH is established. During phase 2, activities are delivered to stimulate the gradual implementation  
45 of SFSH into routine practice by supporting schools in addressing emergent challenges, such as  
46 nicotine dependence or enforcement. Table 1 describes all the intervention activities.  
47  
48  
49  
50  
51

52  
53 >> Insert Figure 2 here <<

54 The activities are expected to produce short-term outputs, which are operationalised in four sets  
55 according to ecological levels<sup>47</sup>: 1) individual guidance, e.g. smoking cessation assistance for students  
56 (individual); 2) organisational development, e.g. development of professional skills and confidence  
57  
58  
59  
60

to enforce SFSH (interpersonal); 3) physical environment changes, e.g. new school-break activities (structural/organisational); and 4) capacity building between school and community, e.g. increased cooperation between the school and the local municipality (community).

**Table 1** Description of intervention activities in the Smoke-Free Vocational Schools intervention.

| Activity                                   | Description                                                                                                                                                                                          | Purpose                                                                                                                                                                                                                                  | Participants                                                                                                                                                                             |
|--------------------------------------------|------------------------------------------------------------------------------------------------------------------------------------------------------------------------------------------------------|------------------------------------------------------------------------------------------------------------------------------------------------------------------------------------------------------------------------------------------|------------------------------------------------------------------------------------------------------------------------------------------------------------------------------------------|
| Phase 1                                    |                                                                                                                                                                                                      |                                                                                                                                                                                                                                          |                                                                                                                                                                                          |
| First meeting                              | An initial meeting between the schools and practice partners, where the SFSH implementation plan is discussed.                                                                                       | To ensure that the schools have a clear implementation plan and know how the intervention activities can support them.<br>To clarify role distributions between different stakeholders.                                                  | Practice partners.<br>School principal and other management representatives.<br>School project coordinator.<br>Local municipality representative.                                        |
| Developing the SFSH policy                 | The schools develop their SFSH policy, including rules and responsibilities for sanctioning and enforcement. The practice partners provide inspirational material, e.g. other schools' policies.     | To ensure the schools develop a clear SFSH policy, which aligns with the schools' rules of conduct.                                                                                                                                      | Decided locally in schools.<br>Practice partners recommend that schools establish a working group including both management and staff representatives.                                   |
| Developing the SFSH communication strategy | The schools develop their internal and external SFSH communication strategy. The practice partners provide inspirational material and financial support to smoke-free signing.                       | To ensure that all organisational members (e.g. students and staff) and relevant external stakeholders (e.g. neighbours and apprenticeship workplaces) know what SFSH entails.                                                           | Decided locally in schools.                                                                                                                                                              |
| Workshop 1 on SFSH implementation          | A joint meeting at the schools for all school staff and managers, facilitated by the practice partners.                                                                                              | To stimulate a joint vision and understanding of why the school is implementing SFSH.<br>To ensure that all organisational members feel confident to enforce SFSH.<br>To address school-specific challenges and issues, e.g. resistance. | Practice partners.<br>All school staff and managers.<br>Local municipality representative.                                                                                               |
| Motivational interviewing course           | A selected group of school staff and managers attend a two-day course delivered by the practice partners.                                                                                            | To provide new knowledge and skills for the selected staff and managers, who are supposed to become key drivers of the implementation in school.<br>To help nicotine-addicted students to cope with not smoking during school hours.     | Practice partners.<br>Selected school staff and managers including the school project coordinator.<br>Local municipality representative.                                                 |
| Smoking cessation assistance               | Offered to students and staff in collaboration with the local municipality.<br>The type of assistance varies between municipalities, depending on local resources and availabilities.                | To help motivated staff and students quit smoking.                                                                                                                                                                                       | Students and staff.<br>Local municipality representative.                                                                                                                                |
| Student workshop                           | A participatory student workshop on how to improve the social environment, delivered in schools by the practice partners. The schools are given financial support (averaging 15,000 € per school) to | To create alternatives to smoking communities at school.<br>To ensure that the new school-break activities are relevant for the students.                                                                                                | Practice partners.<br>Selected group of students.<br>Local municipality representative.<br>The school management and school project coordinator approve the new school-break activities. |



|                                             |                                                                                                                                                                                                                                         |                                                                                                                                                         |                                                                                                                                         |
|---------------------------------------------|-----------------------------------------------------------------------------------------------------------------------------------------------------------------------------------------------------------------------------------------|---------------------------------------------------------------------------------------------------------------------------------------------------------|-----------------------------------------------------------------------------------------------------------------------------------------|
|                                             | establish some of the best school-break activities.                                                                                                                                                                                     |                                                                                                                                                         |                                                                                                                                         |
| Removal of smoking facilities               | The schools remove smoking facilities, e.g. ashtrays.                                                                                                                                                                                   | To signal that the school is smoke-free.                                                                                                                | Decided locally in schools.                                                                                                             |
| Phase 2                                     |                                                                                                                                                                                                                                         |                                                                                                                                                         |                                                                                                                                         |
| The school tobacco policy of SFSH           | The SFSH policy is established in schools. The schools must enact and enforce the policy.                                                                                                                                               | To prevent exposure to second-hand smoke.<br>To prevent smoking initiation and continuation.                                                            | Decided locally in schools.<br>Practice partners recommend that all school staff and managers play a role in enforcement.               |
| Continued smoking cessation assistance      | Smoking cessation assistance is offered to students and staff in collaboration with the local municipality.<br>The type of smoking cessation assistance varies between municipalities, depending on local resources and availabilities. | To help motivated staff and students quit smoking.                                                                                                      | Students and staff.<br>Local municipality representative.                                                                               |
| Network activities for intervention schools | A network for intervention schools is established by the practice partners. Two larger network activities for all schools are delivered during 2018–2020.                                                                               | To facilitate schools exchanging experiences of implementing SFSH and learning from one another.                                                        | School principal and school project coordinator are invited.<br>Participation in network activities will be decided locally in schools. |
| Schools' own initiatives                    | Supportive actions which ease the implementation of SFSH.                                                                                                                                                                               | Decided locally by schools.                                                                                                                             | Decided locally by schools.                                                                                                             |
| Workshop 2                                  | A joint meeting at the schools for all staff and managers, facilitated by the practice partners.                                                                                                                                        | To address school-specific challenges in relation to implementing SFSH.                                                                                 | Practice partners.<br>All school staff and managers.<br>Local municipality representative.                                              |
| Final meeting                               | A final meeting between the schools and practice partners to discuss the SFSH maintenance plan.                                                                                                                                         | To ensure the schools have a clear maintenance plan and know how the municipality and practice partners can support them after the intervention period. | Practice partners.<br>School principal.<br>School project coordinator.<br>Local municipality representative.                            |

SFSH: Smoke-free school hours.

The activities and outputs are together expected to produce 'mechanisms of change', which are the underlying changes in reasoning and behaviour among participants, triggered by the intervention and the intervention context. We expect that the central context-mechanisms allowing SFSH to become part of routine practice will be found at the organisational level, where school staff and managers take responsibility for SFSH, feel confident to enforce SFSH, and feel motivated by positive student responses.<sup>16</sup> At the student level, we expect context-mechanisms to be triggered by: 1) staff and managers enforcing SFSH, resulting in decreased smoking visibility and, in turn, students becoming less prone to conform to others' smoking behaviour;<sup>5</sup> and 2) the new school-break activities resulting in new practices and social norms at school.<sup>48</sup> As such, we expect SFSH to become a natural and accepted part of students' everyday school life.

The mechanisms of change are expected to result in outcomes related to students' smoking behaviour. Our primary outcome measure is 'changes in smoking during school hours', while the secondary

1  
2  
3  
4 outcome measure is ‘changes in the number of cigarettes smoked per day’; both are proximal  
5  
6 outcomes. The intermediate outcome measures are ‘changes in intention to quit’ and ‘changes in  
7  
8 smoking status’. The long-term impact of the intervention will not be evaluated as part of this study.  
9

## 10 11 **Step 2: Study design**

12 The study is designed to test the IPT through focusing on both implementation/process evaluation  
13 and outcomes evaluation. As considered most appropriate in RE,<sup>30,37</sup> we use a multi-methods design,  
14 which allows us to quantify some elements of CMO configurations (e.g. changes in smoking  
15 behaviour) and qualitatively explore the change mechanisms and context.<sup>49</sup> The process evaluation  
16 investigates to what extent the intervention activities have been delivered and are implemented  
17 according to the programme theory, and seeks to explore the mechanisms that hinder or enable SFSH  
18 becoming part of routine practice. The outcomes evaluation assesses the intervention’s outcomes in  
19 terms of students’ smoking behaviour, using a one-group pretest-posttest study design, with sub-  
20 group analysis further determining for whom the intervention is most effective.  
21  
22

23  
24  
25  
26  
27  
28  
29 The intervention is delivered at 11 schools during 2018–2020, seven of which are included in the  
30 evaluation. The remaining four are considered ‘pilot schools’, where the intervention activities and  
31 evaluation methods (e.g. questionnaires) are tested and adjusted. The practice partners recruited  
32 schools that wanted to implement the expanded version of SFSH, banning all tobacco-related  
33 products (e.g. cigarettes, vapers, and snuff) during school and work hours for students, staff, and  
34 visitors. The sample of seven vocational schools accounts for 10% of all Danish vocational schools;  
35 represents all four main educational areas (Technical, Business, Agriculture and food services, and  
36 Social and health services); and covers three (out of five) geographical regions. As such, the study  
37 sample includes a broad variety of vocational school contexts across the country and is, thus,  
38 considered representative of all Danish vocational schools.  
39  
40  
41  
42  
43  
44  
45

### 46 47 **Process evaluation**

48 The process evaluation comprises two mutually informing parts based on the RE-compatible<sup>50</sup>  
49 Medical Research Councils guidelines for Process Evaluation of Complex Interventions.<sup>35</sup> Our  
50 operationalisation of the framework in the study is shown in figure 3.  
51  
52  
53

54 >> Insert Figure 3 here <<

55  
56 The ‘Implementation degree’ study quantitatively measures implementation levels for each of the four  
57 sets of outputs and for the SFSH policy based on fidelity, adaptations, dose, quality of delivery,  
58  
59  
60

1  
2  
3  
4 participant responsiveness, and reach. Hence, the study seeks to occupy a middle position in the  
5 fidelity vs. adaptations debate<sup>50</sup> with an emphasis on measuring both central intervention  
6 implementation (e.g. extent of enforcement) and the schools' contextual initiatives and tailoring (e.g.  
7 means and methods of enforcement). The 'Mechanisms of change' study explores the implementation  
8 processes using both qualitative and quantitative methods. Normalisation process theory<sup>17</sup> proposes  
9 that implementation processes are shaped and motivated by four generative mechanisms – coherence,  
10 cognitive participation, collective action, and reflexive monitoring. This will be the guiding theory in  
11 the investigation of processes that hinder or enable SFSH becoming part of routine practice.  
12  
13  
14  
15  
16  
17  
18

### 19 Outcomes evaluation

20 The outcomes evaluation assesses the effectiveness of the intervention in terms of the primary and  
21 secondary outcomes, measured before SFSH (Time 1, T1), six months after the establishment of  
22 SFSH (Time 2, T2), and twelve months after the establishment of SFSH (Time 3, T3), as shown in  
23 figure 4. The primary outcome measure is changes in 1) smoking during school hours (dichotomous  
24 variable (yes/no)); the secondary outcome measures are changes in 2a) the number of cigarettes  
25 smoked per day (continuous variable), 2b) intention to quit (nominal variable), and 2c) smoking status  
26 (nominal variable). Further, to elaborate on CMO configurations, sub-group analyses are performed  
27 to investigate for whom the intervention is most effective and to explore relations between findings  
28 from the process evaluation, that is, the SFSH implementation fidelity measure and quantitative  
29 indicators of implementation processes. The study thus seeks to elaborate on outcomes across the  
30 programme but also considers outcomes for different subgroups within the population without using  
31 control schools, which is considered appropriate for RE.<sup>37,51,52</sup>  
32  
33  
34  
35  
36  
37  
38  
39  
40

41 >> Insert Figure 4 here <<

### 42 Step 3: Data collection

43 The evaluation lasts approximately 1.5 years per school and covers intervention phase 1 (six months)  
44 and intervention phase 2 (six months), with the final follow-up conducted six months after the  
45 intervention has ended. During this time period, qualitative and quantitative data will be collected  
46 from students, staff, and managers to increase the validity of findings.<sup>53</sup> Table 2 presents an overview  
47 of all data collection measures and procedures, including estimates of eligible participants and  
48 expected response rates. The different data collection measures provide cross-cutting insights for the  
49 process and outcomes evaluations. A preliminary operationalisation of how the data contribute to  
50 each is presented in Supplementary File 1.  
51  
52  
53  
54  
55  
56  
57  
58  
59  
60

## Student surveys

Electronic student surveys are conducted during school hours at three different time points. Students self-report smoking behaviour<sup>54</sup> and intention to quit,<sup>55</sup> smoking-related rules and practices and social norms at school,<sup>56–61</sup> self-efficacy,<sup>62–64</sup> well-being,<sup>65,66</sup> educational information, and demographics. Validated questions have been used when possible and the questionnaire has been pilot-tested in two vocational school classes (n=30 participants) to ensure face validity.<sup>67</sup> Due to the VET school structure, combining in-school education and apprenticeships, individual follow-up is rarely possible. Instead, both paired data from the same individuals and cross-sectional data will be collected. To maximise response rates, data collection is organised by the research partners in each school and conducted during school hours. The students are given time to complete the questionnaire and ask questions. The survey takes approximately 30 minutes per school class. Based on experience with the procedure,<sup>9</sup> we expect that 95% of students will participate in the study.

## *Sample size calculation*

The outcome measure used to determine sample size is change in the number of cigarettes smoked during school hours per day, per student, based on individual follow-up data. We assume that 30% are daily smokers who averagely smoke 18 cigarettes per day, including 8 during school hours.<sup>68</sup> We assume that the intervention will reduce smoking intensity during school hours by 50%, meaning a reduction of 4 cigarettes smoked per school day (with a standard deviation of 4 and 3 and correlation = 0.3). To avoid type-I errors and type-II errors, we respectively chose a 5% significance level and power at 80%. Assuming that the data are normally distributed, we will need to conduct individual follow-up on 11 daily smokers per school. We expect a 30% reduction in participants from baseline to follow-up. Accounting for this, the sample size must include 14.3 daily smokers per school. Thus, if the smoking prevalence is 30%, 24.4 students per school must participate in the prospective study. As seven schools are participating, the sample size for the prospective study must include (at least) 171 students.

## Staff and project coordinator surveys

Staff and project coordinator surveys are electronically distributed to all school organisational members – i.e. managers, teaching staff, counsellors, administrative and kitchen staff, etc. – at three different time points to follow the gradual implementation of SFSH. It is important to include all organisational members as all are expected to be affected by SFSH. The surveys include questions to investigate the implementation degree (e.g. fidelity, dose) and the validated NoMAD scale<sup>69,70</sup> to grasp the implementation processes. The project coordinator surveys include additional questions

about the implementation work (e.g. collaboration with the NGO partners, local municipality and contextual tailoring). The surveys have been pilot-tested among staff, managers, and project coordinators at the four pilot schools (n=23 participants) to ensure face validity.<sup>67</sup> Surveys distributed to NGOs partners both before and after SFSH explore their role in facilitating meetings.

### Structured observations

Structured observations on school grounds are carried out by the researchers at the same time points as the student surveys. Inspired by other studies,<sup>71,72</sup> the structured observations will include observations on smoking visibility (e.g. who, where, and how many smokers are visible during school hours) and physical environment changes (e.g. smoke-free signing and removal of smoking facilities). Data will be registered as field notes.

Interviews and focus groups with principal manager, project coordinator, and teachers  
Semi-structured individual interviews and focus groups with school principals, project coordinators, and teachers are carried out to explore the implementation processes in terms of intervention modalities, change mechanisms, and context features.<sup>73</sup> It is important to gather interview material from the different respondent groups as they provide different perspectives, challenges, and opportunities in relation to implementing SFSH. Specifically, school principals have decision-making power on SFSH and knowledge about school strategic-political processes; project coordinators have in-depth knowledge and experience of all actions for implementing SFSH; and teachers have direct contact with students and are expected to play a large role in enforcing SFSH. During interviews the role of the NGO partners is also explored.

**Table 2** Overview of data in the Smoke-Free Vocational Schools intervention project, including eligible participants (n), expected response rates (n), and data collection procedures.

| Data collection                           | When                | N (eligible) | N (expected) | Procedure                                                                                                                      |
|-------------------------------------------|---------------------|--------------|--------------|--------------------------------------------------------------------------------------------------------------------------------|
| Student survey 1                          | Before SFSH         | 3,000        | 2,000        | Baseline measure focusing on smoking behaviour, etc. Electronic questionnaire distributed by the research team (in school).    |
| Structured observations on school grounds | Before SFSH         | NA           | NA           | Structured observations focusing on smoke-free signing, smoking facilities, and smoking visibility (in school).                |
| Staff survey 1                            | Before SFSH         | 1,200        | 600          | Electronic questionnaire distributed to all staff and managers about SFSH preparation (email).                                 |
| Project coordinator survey 1              | Before SFSH         | 7            | 7            | In-depth electronic questionnaire concerning SFSH preparation (email).                                                         |
| Principal manager interview               | Before SFSH         | 7            | 7            | Semi-structured interview focusing on SFSH preparation, including motivation and past experiences (in school or via Skype).    |
| Student survey 2                          | 6 months after SFSH | 3,000        | 2,000        | Follow-up 1 measure focusing on smoking behaviour, etc. Electronic questionnaire distributed by the research team (in school). |

|                                           |                       |       |       |                                                                                                                                                                                                                                                      |
|-------------------------------------------|-----------------------|-------|-------|------------------------------------------------------------------------------------------------------------------------------------------------------------------------------------------------------------------------------------------------------|
| Structured observations on school grounds | 6 months after SFSH   | NA    | NA    | Structured observations focusing on smoke-free signing, smoking facilities, and smoking visibility (in school).                                                                                                                                      |
| Staff survey 2                            | 6 months after SFSH   | 1,200 | 600   | Electronic questionnaire distributed to all staff and managers about the gradual SFSH implementation (email).                                                                                                                                        |
| Project coordinator survey 2              | 6 months after SFSH   | 7     | 7     | In-depth electronic questionnaire about the gradual SFSH implementation (email).                                                                                                                                                                     |
| Staff focus group                         | 6–8 months after SFSH | 21–42 | 21–42 | Focus groups with teaching staff, counsellors, and/or others assigned a special role in relation to SFSH. Focusing on daily practice, reasoning, and how/if the intervention has supported the gradual SFSH implementation (in school or via Skype). |
| Project coordinator interview             | 6–8 months after SFSH | 7     | 7     | Semi-structured interview focusing on daily practice, reasoning, and how/if the intervention has supported the gradual SFSH implementation (in school or via Skype).                                                                                 |
| Student survey 3                          | 12 months after SFSH  | 3,000 | 2,000 | Follow-up 2 measure focusing on smoking behaviour, etc. Electronic questionnaire distributed by the research team (in school).                                                                                                                       |
| Structured observations on school grounds | 12 months after SFSH  | NA    | NA    | Structured observations focusing on smoke-free signing, smoking facilities, and smoking visibility (in school).                                                                                                                                      |
| Staff survey 3                            | 12 months after SFSH  | 1,200 | 600   | Electronic questionnaire distributed to all staff and managers about the gradual SFSH implementation (email).                                                                                                                                        |
| Facilitator survey (NGOs)                 | Before and after SFSH | NA    | NA    | Electronic questionnaire distributed to the practice partners in relation to different intervention activities, i.e. student and staff workshops and courses.                                                                                        |

SFSH: Smoke-free school hours.

## Step 4: Data analysis

### Process evaluation

Implementation levels are assessed using confirmatory factor analysis.<sup>74</sup> Inspired by Bast et al.,<sup>29</sup> data are used to develop indexes of low and high implementation degree, while associations between the outputs and the overall SFSH implementation fidelity model are analysed using regression analysis. This allows us to investigate to what extent the intervention activities predict the implementation degree of SFSH. Mechanisms of change are explored by combining qualitative and quantitative data and by using the generative mechanisms proposed by normalisation process theory (coherence, cognitive participation, collective action, and reflexive monitoring) to structure the analysis. Qualitative data will be coded using an abductive approach, whereas quantitative data will be analysed using descriptive techniques to further explain, supplement, or challenge the qualitative analyses of what enables or hinders SFSH becoming part of routine practice.

### Outcomes evaluation

The outcomes evaluation uses multi-level linear or logistic regression, depending on the outcome measures.<sup>75</sup> The primary analysis will be a two-level model, with students (level 1) nested in schools

1  
2  
3  
4 (level 2). In secondary analysis, we will investigate effects according to pre-defined subgroups, such  
5 as sex, age, and SES. To further elaborate on CMO configurations, we will test the associations  
6 between quantitative measures of implementation degree and implementation processes from the  
7 process evaluation, using descriptive analysis, logistic regression, and/or factor analysis.<sup>76,77</sup>  
8  
9

## 10 11 12 **Step 5: Synthesis**

13 Empirical and theoretical knowledge about the implementation and outcomes of the intervention will  
14 be synthesised into recommendations on how to implement SFSH. RE advocates using retrodution  
15 and abduction in iterative processes to test and refine IPT.<sup>37,73,78</sup> Retrodution is a form of inference  
16 that seeks to identify and verify the mechanisms theorised to have generated the phenomena under  
17 study,<sup>73,78</sup> whereas abduction is the process of describing empirical data using theoretical concepts,<sup>73</sup>  
18 with emphasis on analysing data that fall outside an initial theoretical frame or premise.<sup>78,79</sup> Regarding  
19 the Smoke-Free Vocational Schools intervention project, our goal is to integrate qualitative and  
20 quantitative findings from the process and outcomes evaluations to re-analyse the IPT in terms of  
21 what works, for whom, and under what circumstances, using a retroductive-abductive approach.  
22 Based on the refined programme theory, we will be able to develop model recommendations for  
23 implementing SFSH in vocational schools and similar settings.  
24  
25  
26  
27  
28  
29  
30  
31  
32

## 33 **Patient and Public Involvement**

34  
35 This study protocol describes a health promotion intervention and no patients have been involved.  
36 Public involvement, defined as collaboration with public health partners with knowledge on the  
37 VET school setting, has been extensive. The partnering NGO organizations and research institution  
38 have worked closely together and collaborated and agreed on the design of the intervention and  
39 evaluation. The NGO partners have been involved in the development of the research questions and  
40 on choosing the outcome measures and are co-authoring this study protocol. The NGO partners  
41 recruited the VET schools and supported the schools in the implementation of SFSH. The  
42 evaluation results will be disseminated to NGO partners, VET schools and students through SoMe  
43 news and a short 2-page publication in layman language.  
44  
45  
46  
47  
48

## 49 **ETHICS AND DISSEMINATION**

50 In public health interventions it is important to examine and clarify possible negative reverse effects,  
51 so as to avoid further interventions generating the same negative effects.<sup>80</sup> Therefore, unexpected  
52 consequences of the intervention will be explored and reported to minimise and avoid participants  
53 feeling stigmatised in this study and similar future studies.  
54  
55  
56  
57  
58  
59  
60

1  
2  
3  
4 The study has been reported to the Capital Region of Denmark's legal centre for personal data  
5 handling (journal number: VD-2018-485). Informed consent will be obtained from all study  
6 participants according to the General Data Protection Regulation and Danish data protection law. The  
7 study adheres to the ethics procedures in Denmark. Study findings will be disseminated at  
8 international and national conferences and further published in open-access peer-reviewed journals.  
9 Also, the study findings will be used by the practice partners in their further work supporting schools  
10 implementing SFSH, as well as by other stakeholders (e.g. schools).  
11  
12  
13  
14  
15  
16

## 17 Declarations

### 18 Acknowledgements

19 Great thanks to the participating vocational schools who readily share their time and experiences  
20 with the research team.  
21  
22  
23

### 24 Funding statement

25 This work was supported by The Danish Health Authority grant number: 1-1010-308/56  
26  
27

### 28 Authors contributions

29 The authors contributions to different aspects of this work were as follows: Conceiving and  
30 designing the study: AVH, TBC, MS, KHR and CDK; Refining the study design and obtaining  
31 ethical approval: AVH, CP, TTT, CDK; Writing and revising this manuscript (fully or in part):  
32 AVH, TBC, MS, KHR, CP, TTT, CDK.  
33  
34

### 35 Patient and public partnership

36 The research and intervention project is a collaboration between research and practice: Two Danish  
37 public health NGOs (the Danish Heart Foundation and the Danish Cancer Society) are practice  
38 partners, whereas Steno Diabetes Center Copenhagen is research partner. The intervention has been  
39 cocreated through a participatory process, with an emphasis on including both evidence and practice  
40 experience. Further, the practice partners involved in the design and conduct of the study, the choice  
41 of outcome measures and recruitment to the study.  
42  
43  
44

### 45 Competing interests

46 The authors declare that they have no competing interests.  
47  
48  
49  
50  
51  
52

## 53 REFERENCES

- 54 1. Boyce, J. C., Mueller, N. B., Hogan-Watts, M. & Luke, D. A. Evaluating the Strength of School  
55 Tobacco Policies: The Development of a Practical Rating System. *J. Sch. Health* **79**, 495–504 (2009).  
56  
57  
58  
59  
60



2. Agaku, I. T., Obadan, E. M., Odukoya, O. O. & Olufajo, O. Tobacco-free schools as a core component of youth tobacco prevention programs: a secondary analysis of data from 43 countries. *Eur. J. Public Health* **25**, 210–215 (2015).
3. Aveyard, P., Markham, W. A. & Cheng, K. . A methodological and substantive review of the evidence that schools cause pupils to smoke. *Soc. Sci. Med.* **58**, 2253–2265 (2004).
4. Sæbø, G. & Scheffels, J. Assessing notions of denormalization and renormalization of smoking in light of e-cigarette regulation. *Int. J. Drug Policy* **49**, 58–64 (2017).
5. Schreuders, M., Nuyts, P. A. W., van den Putte, B. & Kunst, A. E. Understanding the impact of school tobacco policies on adolescent smoking behaviour: A realist review. *Soc. Sci. Med.* **183**, 19–27 (2017).
6. Leatherdale, S. T., Brown, K. S., Cameron, R. & McDonald, P. W. Social modeling in the school environment, student characteristics, and smoking susceptibility: A multi-level analysis. *J. Adolesc. Health* **37**, 330–336 (2005).
7. Schreuders, M. *et al.* The association between smoke-free school policies and adolescents' anti-smoking beliefs: Moderation by family smoking norms. *Drug Alcohol Depend.* **204**, 107521 (2019).
8. *Erhvervsuddannelser i Danmark 2019 [Vocational Education and Training in Denmark 2019]*. (Danmarks Statistik [Statistics Denmark], 2019).
9. Klinker, C. D. *et al.* Health Literacy is Associated with Health Behaviors in Students from Vocational Education and Training Schools: A Danish Population-Based Survey. *Int. J. Environ. Res. Public Health* **17**, 671 (2020).
10. Veronica Pisinger *et al.* *UNG19 - Sundhed og trivsel på gymnasiale uddannelser 2019 [The Health and Wellbeing survey in Danish general upper secondary education]*. (2019).
11. Uddannelsesstatistik [Educational statistics Denmark]. *Uddannelsesstatistik* <https://uddannelsesstatistik.dk/Pages/Reports/1838.aspx>.
12. Frohlich, K. L. & Potvin, L. Transcending the Known in Public Health Practice: The Inequality Paradox: The Population Approach and Vulnerable Populations. *Am. J. Public Health* **98**, 216–221 (2008).
13. Durlak, J. A. & DuPre, E. P. Implementation Matters: A Review of Research on the Influence of Implementation on Program Outcomes and the Factors Affecting Implementation. *Am. J. Community Psychol.* **41**, 327–350 (2008).
14. Murray, E. *et al.* Normalisation process theory: a framework for developing, evaluating and implementing complex interventions. *BMC Med.* **8**, (2010).
15. Galanti, M. R., Coppo, A., Jonsson, E., Bremberg, S. & Faggiano, F. Anti-tobacco policy in schools: upcoming preventive strategy or prevention myth? A review of 31 studies. *Tob. Control* **23**, 295 (2014).

16. Linnansaari, A., Schreuders, M., Kunst, A. E., Rimpelä, A. & Lindfors, P. Understanding school staff members' enforcement of school tobacco policies to achieve tobacco-free school: a realist review. *Syst. Rev.* **8**, (2019).
17. May, C. & Finch, T. Implementing, Embedding, and Integrating Practices: An Outline of Normalization Process Theory. *Sociology* **43**, 535–554 (2009).
18. Lipperman-Kreda, S., Paschall, M. J. & Grube, J. W. Perceived enforcement of school tobacco policy and adolescents' cigarette smoking. *Prev. Med.* **48**, 562–566 (2009).
19. Adams, M. L., Jason, L. A., Pokorny, S. & Hunt, Y. The Relationship Between School Policies and Youth Tobacco Use\*. *J. Sch. Health* **79**, 17–23 (2009).
20. Moore, L. School smoking policies and smoking prevalence among adolescents: multilevel analysis of cross-sectional data from Wales. *Tob. Control* **10**, 117–123 (2001).
21. Jarlstrup, N. S. *et al.* International Approaches to Tobacco Use Cessation Programs and Policy in Adolescents and Young Adults: Denmark. *Curr. Addict. Rep.* **5**, 42–53 (2018).
22. Gordon, J. Ifs, maybes and butts: factors influencing staff enforcement of pupil smoking restrictions. *Health Educ. Res.* **18**, 329–340 (2003).
23. Turner, K. M. Butt in, butt out: pupils' views on the extent to which staff could and should enforce smoking restrictions. *Health Educ. Res.* **19**, 40–50 (2004).
24. Schreuders, M., Linnansaari, A., Lindfors, P., van den Putte, B. & Kunst, A. E. Why staff at European schools abstain from enforcing smoke-free policies on persistent violators. *Health Promot. Int.* (2019) doi:10.1093/heapro/daz111.
25. SILNE-R. *SILNE-R. Enhancing the effectiveness of programs and strategies to prevent smoking by adolescents: a realist evaluation comparing seven European countries* <http://silne-r.ensp.network/about-silne/objectives/>.
26. SILNE-R consortium, Schreuders, M., van den Putte, B. & Kunst, A. E. Why Secondary Schools Do Not Implement Far-Reaching Smoke-Free Policies: Exploring Deep Core, Policy Core, and Secondary Beliefs of School Staff in the Netherlands. *Int. J. Behav. Med.* **26**, 608–618 (2019).
27. Heinze, C., Hjort, A. V., Elsborg, P., Maindal, H. T. & Klinker, C. D. Smoke-free-school-hours at vocational education and training schools in Denmark: attitudes among managers and teaching staff – a national cross-sectional study. *BMC Public Health* **19**, (2019).
28. Kathrine Højlund Rasmussen, Anneke Vang Hansen, Charlotte Demant Klinker, & Steffen Löfvall, Clara Heinze. *Udbredelse af røgfri skoletid på erhvervsskoler: en forundersøgelse til en effektiv tobaksforebyggelsesindsats på erhvervsskoler*. (Hjerteforeningen : Steno Diabetes Center, 2018).
29. Bast, L. S. *et al.* High impact of implementation on school-based smoking prevention: the X:IT study—a cluster-randomized smoking prevention trial. *Implement. Sci.* **11**, (2015).

- 1  
2  
3  
4  
5  
6  
7  
8  
9  
10  
11  
12  
13  
14  
15  
16  
17  
18  
19  
20  
21  
22  
23  
24  
25  
26  
27  
28  
29  
30  
31  
32  
33  
34  
35  
36  
37  
38  
39  
40  
41  
42  
43  
44  
45  
46  
47  
48  
49  
50  
51  
52  
53  
54  
55  
56  
57  
58  
59  
60
30. Pawson, R. & Tilley, N. *Realistic evaluation*. (Sage, 1997).
31. Dalkin, S. M., Greenhalgh, J., Jones, D., Cunningham, B. & Lhussier, M. What's in a mechanism? Development of a key concept in realist evaluation. *Implement. Sci.* **10**, (2015).
32. Moore, G. F. *et al.* From complex social interventions to interventions in complex social systems: Future directions and unresolved questions for intervention development and evaluation. *Evaluation* **25**, 23–45 (2019).
33. Hawe, P., Shiell, A. & Riley, T. Theorising Interventions as Events in Systems. *Am. J. Community Psychol.* **43**, 267–276 (2009).
34. Keshavarz, N., Nutbeam, D., Rowling, L. & Khavarpour, F. Schools as social complex adaptive systems: A new way to understand the challenges of introducing the health promoting schools concept. *Soc. Sci. Med.* **70**, 1467–1474 (2010).
35. Moore, G. F. *et al.* Process evaluation of complex interventions: Medical Research Council guidance. *BMJ* **350**, h1258–h1258 (2015).
36. Craig, P. *et al.* Developing and evaluating complex interventions: the new Medical Research Council guidance. *BMJ* a1655 (2008) doi:10.1136/bmj.a1655.
37. Wong, G. *et al.* Quality and reporting standards, resources, training materials and information for realist evaluation: the RAMESES II project. *Health Serv. Deliv. Res.* **5**, 1–108 (2017).
38. Gilmore, B., McAuliffe, E., Power, J. & Vallières, F. Data Analysis and Synthesis Within a Realist Evaluation: Toward More Transparent Methodological Approaches. *Int. J. Qual. Methods* **18**, 160940691985975 (2019).
39. Marchal, B., van Belle, S., van Olmen, J., Hoerée, T. & Kegels, G. Is realist evaluation keeping its promise? A review of published empirical studies in the field of health systems research. *Evaluation* **18**, 192–212 (2012).
40. Glynn Sharpe. A Review of Program Theory and Theory-Based Evaluations. *Am. Int. J. Contemp. Res.* (2011).
41. Ray Pawson & Sanjeev Sridharan. Chapter 4: Theory-driven evaluation of public health programmes. in *Evidence-based Public Health: Effectiveness and efficiency* vol. 2009 (Oxford University Press).
42. Marchal, B., Giral, A. N., Sulaberidze, L., Chikovani, I. & Abejirinde, I.-O. O. Designing and evaluating provider results-based financing for tuberculosis care in Georgia: a realist evaluation protocol. *BMJ Open* **9**, e030257 (2019).
43. Evans, R., Scourfield, J. & Murphy, S. Pragmatic, formative process evaluations of complex interventions and why we need more of them. *J. Epidemiol. Community Health* **69**, 925–926 (2015).

- 1  
2  
3  
4 44. Kellogg Foundation 2004. Using Logic Models to Bring Together Planning, Evaluation, and  
5 Action. Logic Model Development Guide.  
6  
7  
8 45. Rod, M. H., Ingholt, L., Bang Sørensen, B. & Tjørnhøj-Thomsen, T. The spirit of the  
9 intervention: reflections on social effectiveness in public health intervention research. *Crit. Public Health*  
10 **24**, 296–307 (2014).  
11  
12 46. Weiner, B. J. A theory of organizational readiness for change. *Implement. Sci.* **4**, (2009).  
13  
14 47. McLeroy, K. R., Bibeau, D., Steckler, A. & Glanz, K. An ecological perspective on health  
15 promotion programs. *Health Educ. Q.* **15**, 351–377 (1988).  
16  
17 48. Ingholt, L. *et al.* How can we strengthen students' social relations in order to reduce school  
18 dropout? An intervention development study within four Danish vocational schools. *BMC Public Health* **15**,  
19 (2015).  
20  
21  
22 49. Rogers, P. J. Using Programme Theory to Evaluate Complicated and Complex Aspects of  
23 Interventions. *Evaluation* **14**, 29–48 (2008).  
24  
25 50. Graham Moore<sup>1,2</sup> *et al.* *Process evaluation of complex interventions. UK Medical Research*  
26 *Council (MRC) guidance. Full text.* ([https://mrc.ukri.org/documents/pdf/mrc-phsrn-process-evaluation-](https://mrc.ukri.org/documents/pdf/mrc-phsrn-process-evaluation-guidance-final/)  
27 [guidance-final/](https://mrc.ukri.org/documents/pdf/mrc-phsrn-process-evaluation-guidance-final/)).  
28  
29 51. Wong, G., Greenhalgh, T., Westhorp, G., Buckingham, J. & Pawson, R. RAMESES publication  
30 standards: realist syntheses. *BMC Med.* **11**, (2013).  
31  
32 52. Hawkins, A. J. Realist evaluation and randomised controlled trials for testing program theory  
33 in complex social systems. *Evaluation* **22**, 270–285 (2016).  
34  
35 53. Suter, W. *Introduction to Educational Research: A Critical Thinking Approach.* (SAGE  
36 Publications, Inc., 2012). doi:10.4135/9781483384443.  
37  
38 54. Kremers, S. P. J., Mudde, A. N. & de Vries, H. Development and Longitudinal Test of an  
39 Instrument to Measure Behavioral Stages of Smoking Initiation. *Subst. Use Misuse* **39**, 225–252 (2004).  
40  
41 55. Prochaska, J. O. & Velicer, W. F. The Transtheoretical Model of Health Behavior Change. *Am.*  
42 *J. Health Promot.* **12**, 38–48 (1997).  
43  
44 56. Chung, A. & Rimal, R. N. Social norms: A review. *Rev. Commun. Res.* **4**, 1–28 (2016).  
45  
46 57. Eisenberg, M. E. & Forster, J. L. Adolescent smoking behavior: measures of social norms. *Am.*  
47 *J. Prev. Med.* **25**, 122–128 (2003).  
48  
49 58. *Lozano, P. A. (2016). Smoking-Related Stigma: A Public Health Tool Or A Damaging Force ?.*  
50 *(Doctoral dissertation). Retrieved from <https://scholarcommons.sc.edu/etd/3488>.*  
51  
52 59. Dohnke, B., Weiss-Gerlach, E. & Spies, C. D. Social influences on the motivation to quit  
53 smoking: Main and moderating effects of social norms. *Addict. Behav.* **36**, 286–293 (2011).  
54  
55  
56  
57  
58  
59  
60

- 1  
2  
3  
4 60. Katherine East. *The Development of Tools to Measure Norms Towards Smoking, Nicotine Use, and the Tobacco Industry*. 2017.
- 5  
6  
7  
8 61. Brown-Johnson, C. G. *et al.* Validity and reliability of the internalized stigma of smoking  
9 inventory: An exploration of shame, isolation, and discrimination in smokers with mental health diagnoses:  
10 Smoking Stigma Scale. *Am. J. Addict.* **24**, 410–418 (2015).
- 11  
12 62. Conner, M., Conner, M., Sandberg, T., McMillan, B. & Higgins, A. Role of anticipated regret,  
13 intentions and intention stability in adolescent smoking initiation. *Br. J. Health Psychol.* **11**, 85–101 (2006).
- 14  
15 63. Romppel, M. *et al.* A short form of the General Self-Efficacy Scale (GSE-6): Development,  
16 psychometric properties and validity in an intercultural non-clinical sample and a sample of patients at risk  
17 for heart failure. *GMS Psycho-Soc.-Med.* *10Doc01 ISSN 1860-5214* (2013) doi:10.3205/psm000091.
- 18  
19 64. Sterling, K. L., Ford, K. H., Park, H. & McAlister, A. L. Scales of Smoking-Related Self-Efficacy,  
20 Beliefs, and Intention: Assessing Measurement Invariance among Intermittent and Daily High School  
21 Smokers. *Am. J. Health Promot.* **28**, 310–315 (2014).
- 22  
23 65. Hans Henrik Knoop, Aarhus Universitet, Bjørn E. Holstein, Syddansk Universitet, Hanne  
24 Viskum, Professionshøjskolen Metropol & Jannie Moon Lindskov, DCUM. *Elevernes fællesskab og trivsel i*  
25 *skolen. Analyser af Den Nationale Trivselsmåling [Pupils communities and well-being in primary school.*  
26 *Analysis based on the national well-being survey]*. [https://dcum.dk/media/2107/dcum-rapport-elevernes-](https://dcum.dk/media/2107/dcum-rapport-elevernes-trivsellow.pdf)  
27 [trivsellow.pdf](https://dcum.dk/media/2107/dcum-rapport-elevernes-trivsellow.pdf) (2017).
- 28  
29 66. Tennant, R. *et al.* The Warwick-Edinburgh Mental Well-being Scale (WEMWBS): development  
30 and UK validation. *Health Qual. Life Outcomes* **5**, 63 (2007).
- 31  
32 67. Thomas, S. D., Hathaway, D. K. & Arheart, K. L. Face Validity. *West. J. Nurs. Res.* **14**, 109–112  
33 (1992).
- 34  
35 68. Lene Winther Ringgaard, Clara Heinze, Nicklas Bunck Sørensen Andersen, Gro Inge Lemcke  
36 Hansen, Anneke Vang Hjort, Charlotte Demant Klinker. *UNG19 - Sundhed og trivsel på erhvervsuddannelser*  
37 *2019 [The Health and Wellbeing survey in Danish vocational education and training]*. (2020).
- 38  
39 69. Rapley, T. *et al.* Improving the normalization of complex interventions: part 1 - development  
40 of the NoMAD instrument for assessing implementation work based on normalization process theory (NPT).  
41 *BMC Med. Res. Methodol.* **18**, (2018).
- 42  
43 70. Finch, T. L. *et al.* Improving the normalization of complex interventions: part 2 - validation of  
44 the NoMAD instrument for assessing implementation work based on normalization process theory (NPT).  
45 *BMC Med. Res. Methodol.* **18**, (2018).
- 46  
47 71. Rozema, A. D., Mathijssen, J. J. P., van Oers, H. A. M. & Jansen, M. W. J. Evaluation of the  
48 Process of Implementing an Outdoor School Ground Smoking Ban at Secondary Schools. *J. Sch. Health* **88**,  
49 859–867 (2018).
- 50  
51  
52  
53  
54  
55  
56  
57  
58  
59  
60

- 1  
2  
3  
4 72. Saluja, K. *et al.* School environment assessment tools to address behavioural risk factors of  
5 non-communicable diseases: A scoping review. *Prev. Med. Rep.* **10**, 1–8 (2018).  
6  
7  
8 73. Mukumbang, F. C., Marchal, B., Van Belle, S. & van Wyk, B. Using the realist interview  
9 approach to maintain theoretical awareness in realist studies. *Qual. Res.* 146879411988198 (2019)  
10 doi:10.1177/1468794119881985.  
11  
12 74. Floyd, F. J. & Widaman, K. F. Factor analysis in the development and refinement of clinical  
13 assessment instruments. *Psychol. Assess.* **7**, 286–299 (1995).  
14  
15 75. Kirkwood, B. R., Sterne, J. A. C. & Kirkwood, B. R. *Essential medical statistics*. (Blackwell  
16 Science, 2003).  
17  
18 76. Ford, J. A. *et al.* Access to primary care for socio-economically disadvantaged older people in  
19 rural areas: exploring realist theory using structural equation modelling in a linked dataset. *BMC Med. Res.*  
20 *Methodol.* **18**, (2018).  
21  
22 77. Ravn, R. Testing mechanisms in large-N realistic evaluations. *Evaluation* **25**, 171–188 (2019).  
23  
24 78. Jagosh, J. Retroductive theorizing in Pawson and Tilley’s applied scientific realism. *J. Crit.*  
25 *Realism* **19**, 121–130 (2020).  
26  
27 79. Meyer, S. B. & Lunnay, B. The Application of Abductive and Retroductive Inference for the  
28 Design and Analysis of Theory-Driven Sociological Research. *Sociol. Res. Online* **18**, 86–96 (2013).  
29  
30 80. Bonell, C., Jamal, F., Melendez-Torres, G. J. & Cummins, S. ‘Dark logic’: theorising the harmful  
31 consequences of public health interventions. *J. Epidemiol. Community Health* **69**, 95–98 (2015).  
32  
33  
34  
35  
36  
37  
38  
39

## 40 Figure Legends

41  
42  
43  
44 **Figure 1** Realist research cycle of the Smoke-Free Vocational Schools intervention project.

45  
46 **Figure 2** Graphic representation of the initial programme theory of the Smoke-Free Vocational Schools intervention. SFSH:  
47 Smoke-free school hours. The intervention activities delivered by practice partners are shown in purple. The activities or processes  
48 managed by schools but facilitated by practice partners are shown in green.

49  
50 **Figure 3** Process evaluation of the Smoke-Free Vocational Schools intervention, based on the Medical Research Councils  
51 guidelines for process evaluation of complex interventions.

52  
53 **Figure 4** Timeline and outcomes evaluation for the Smoke-Free Vocational Schools intervention.  
54  
55  
56  
57  
58  
59  
60

**Figure 1** Realist research cycle of the Smoke-Free Vocational Schools intervention project.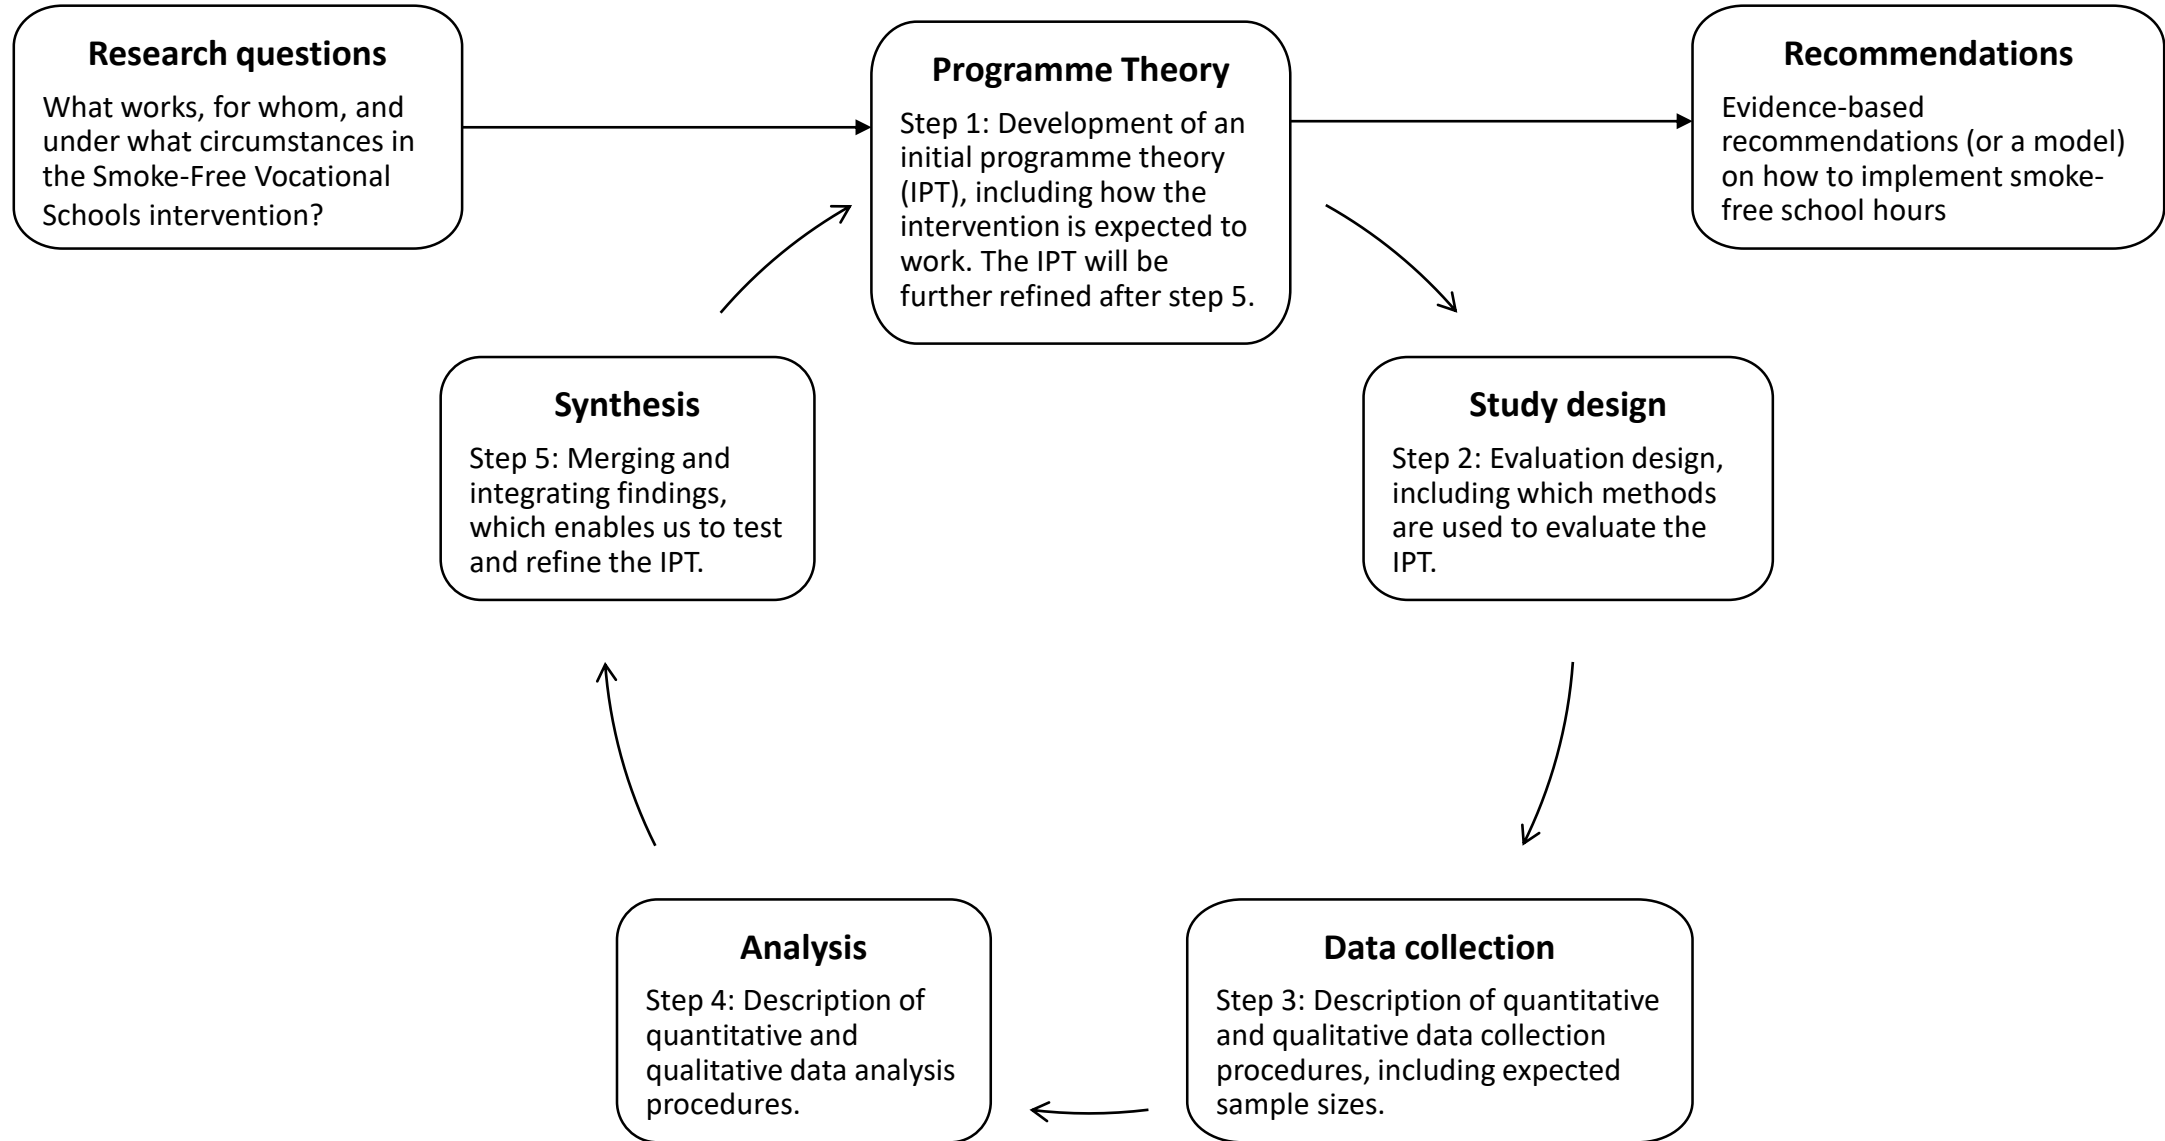

**Figure 2** Graphic representation of the initial programme theory of the Smoke-Free Vocational Schools intervention. SFSH: Smoke-free school hours. The intervention activities delivered by practice partners are shown in purple. The activities or processes managed by schools but facilitated by practice partners are shown in green.

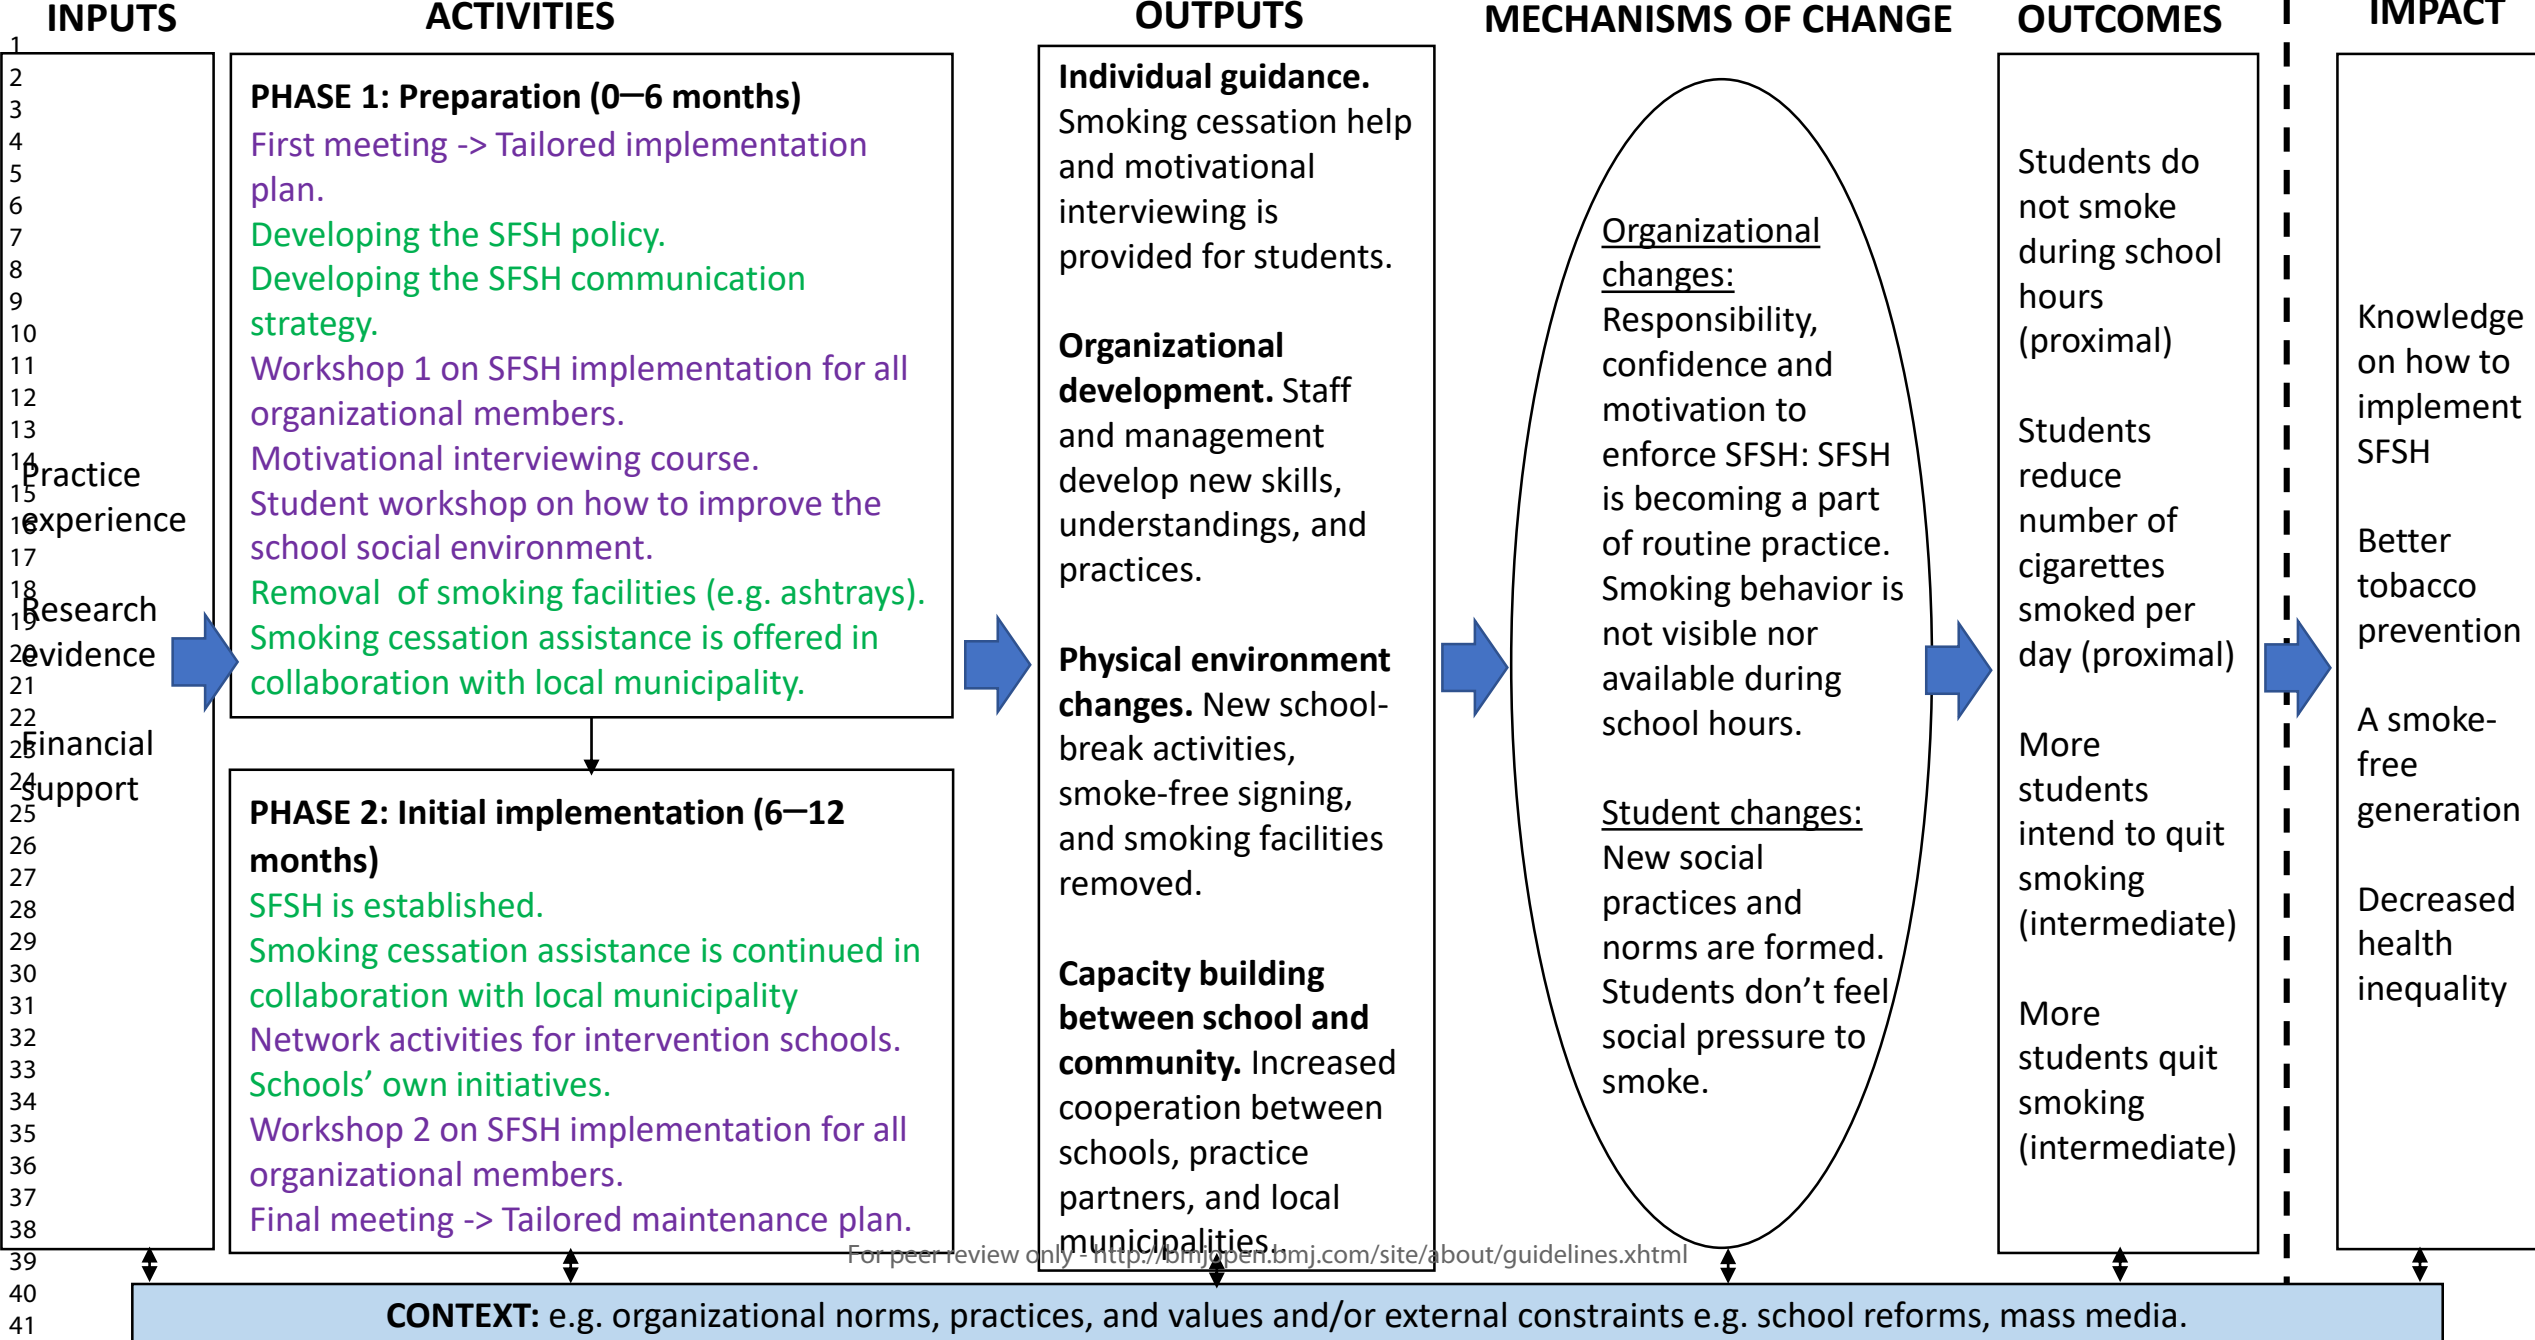

1  
2  
3  
4  
5  
6  
7  
8  
9  
10  
11  
12  
13  
14  
15  
16  
17  
18  
19  
20  
21  
22  
23  
24  
25  
26  
27  
28  
29  
30  
31  
32  
33  
34  
35  
36  
37  
38  
39  
40  
41



**Figure 3** Process evaluation of the Smoke-Free Vocational Schools intervention, based on the Medical Research Councils guidelines for process evaluation of complex interventions.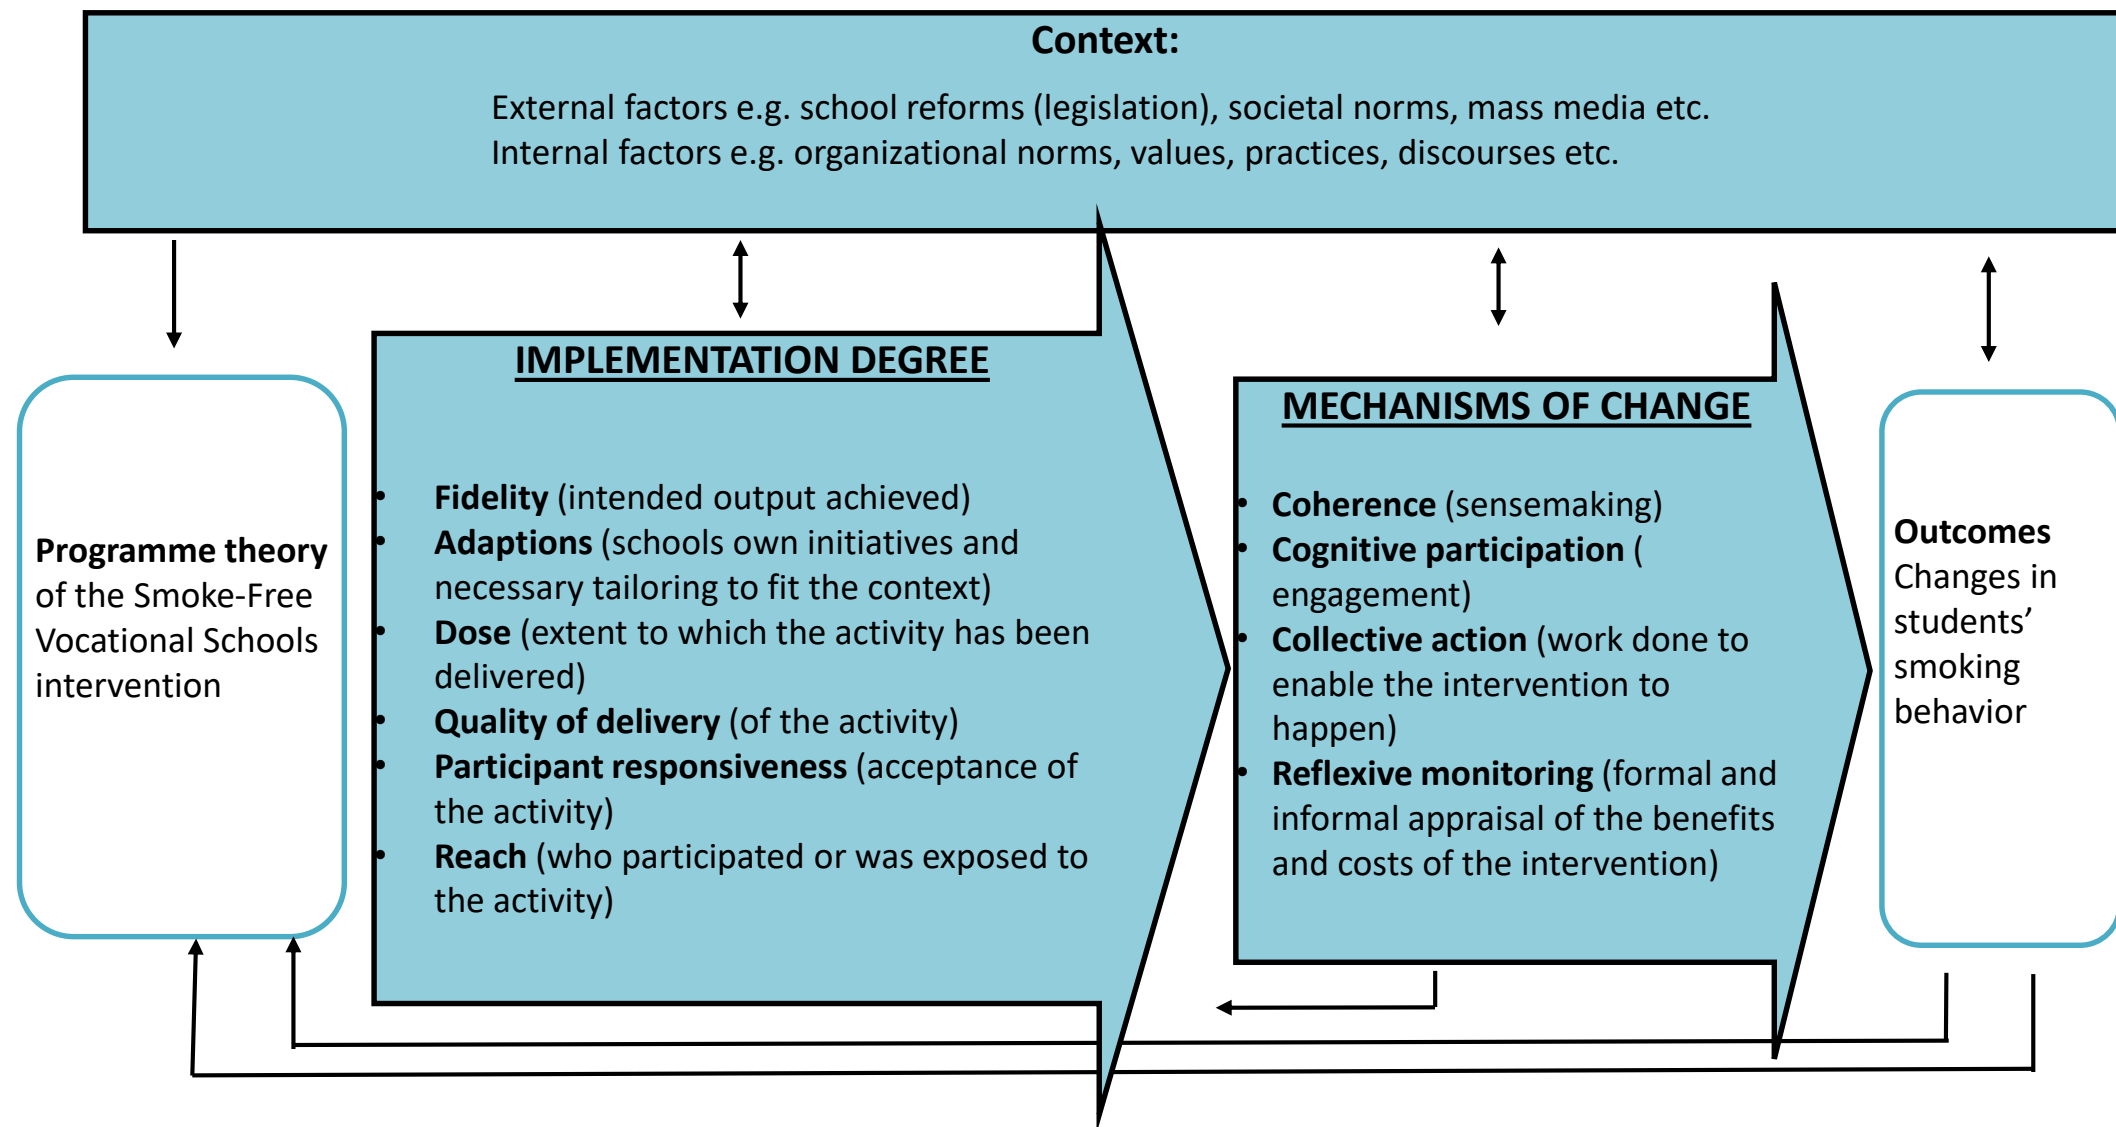

**Figure 4** Timeline and outcomes evaluation for the Smoke-Free Vocational Schools intervention.

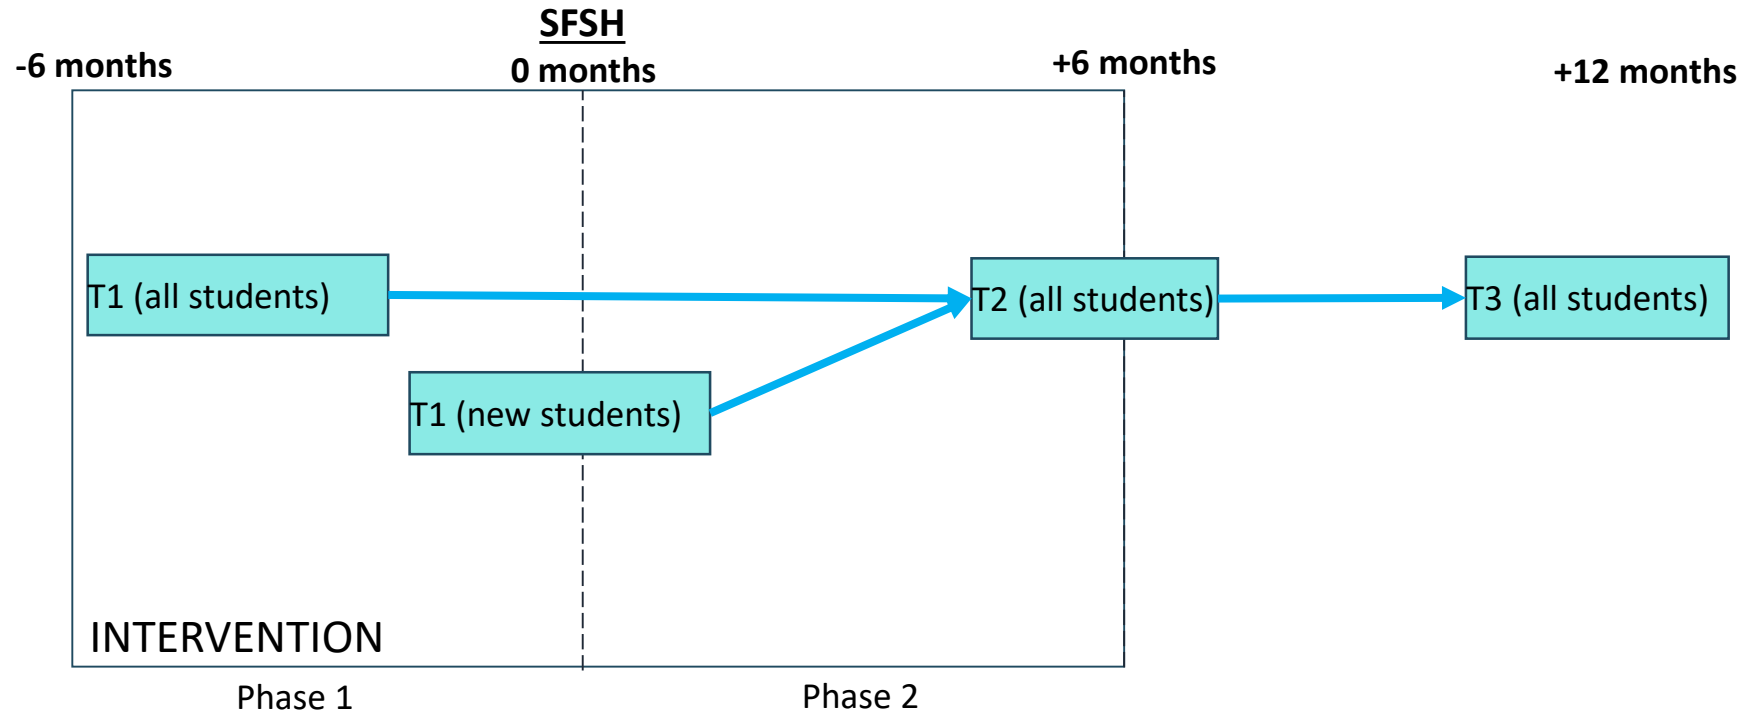

**Supplementary File 1: Operationalization of data collection in the process evaluation (implementation degree and mechanisms of change) and the outcomes evaluation**

|                              | Concept                    | Operationalization                                                                                                                                                         | Data collection                                                                                         |
|------------------------------|----------------------------|----------------------------------------------------------------------------------------------------------------------------------------------------------------------------|---------------------------------------------------------------------------------------------------------|
| <b>Implementation degree</b> |                            |                                                                                                                                                                            |                                                                                                         |
| Organizational development   | Fidelity                   | If the workshops and course has resulted in a shared smoke-free school hours understanding and new skills to support students dealing with not smoking during school hours | Staff survey 1; Staff survey 2                                                                          |
|                              | Adaptions                  | Context-specific adjustments and initiatives                                                                                                                               | Project coordinator survey 2; Facilitator questionnaire (NGOs)                                          |
|                              | Dose                       | Extent to which new learnings from workshops and skills from course are being used at school                                                                               | Staff survey 1; Staff survey 2                                                                          |
|                              | Quality of delivery        | Organization of new learnings and skills at school                                                                                                                         | Staff survey 1; Staff survey 2                                                                          |
|                              | Participant responsiveness | Attitudes towards workshops and course                                                                                                                                     | Staff survey 1; Staff survey 2                                                                          |
|                              | Reach                      | For whom is the component implemented (sub-group analysis)                                                                                                                 | Staff survey 1; Staff survey 2                                                                          |
| Physical environment changes | Fidelity                   | If new school-break activities and smoke-free-signing has been established, and smoking facilities removed                                                                 | Project coordinator survey 2                                                                            |
|                              | Adaptions                  | Context-specific adjustments and initiatives                                                                                                                               | Project coordinator survey 2; structured observations on school grounds; Project coordinator interviews |
|                              | Dose                       | Extent to which school-break activities and smoke-free signing is known to students                                                                                        | Student survey 2                                                                                        |
|                              | Quality of delivery        | Extent to which new school-break activities are being used by students and smoke-free signing has a prominent position                                                     | Student survey 2; structured observations on school grounds                                             |
|                              | Participant responsiveness | Attitudes towards workshops new school-break activities and smoke-free-signing                                                                                             | Student survey 2                                                                                        |
|                              | Reach                      | For whom is the component implemented (sub-group analysis)                                                                                                                 | Student survey 2                                                                                        |
| Individual guidance          | Fidelity                   | If the school offers smoking cessation help or other help for students to cope with smoke-free school hours                                                                | Project coordinator survey 2                                                                            |
|                              | Adaptions                  | Context-specific adjustments and initiatives                                                                                                                               | Project coordinator survey 1; Project coordinator survey 2; Project coordinator interview               |
|                              | Dose                       | Number of smoking cessation courses delivered and number of students attending the courses                                                                                 | Project coordinator survey 1; Project coordinator survey 2                                              |
|                              | Quality of delivery        | Extent to which students know which support to cope with smoke-free school hours is provided                                                                               | Student survey 2                                                                                        |
|                              | Participant responsiveness | Attitudes towards help to cope with smoke-free school hours and attitudes towards attending smoking cessation courses                                                      | Student survey 2                                                                                        |

1  
2  
3  
4  
5  
6  
7  
8  
9  
10  
11  
12  
13  
14  
15  
16  
17  
18  
19  
20  
21  
22  
23  
24  
25  
26  
27  
28  
29  
30  
31  
32  
33  
34  
35  
36  
37  
38  
39  
40  
41  
42  
43  
44  
45  
46  
47  
48  
49  
50  
51  
52  
53  
54  
55  
56  
57  
58  
59  
60

|                                                                                                                                                                              | Reach                      | For whom is the component implemented (sub-group analysis)                                                                                                                                                                                                                                                                                                                                                 | Student survey 2                                                                            |
|------------------------------------------------------------------------------------------------------------------------------------------------------------------------------|----------------------------|------------------------------------------------------------------------------------------------------------------------------------------------------------------------------------------------------------------------------------------------------------------------------------------------------------------------------------------------------------------------------------------------------------|---------------------------------------------------------------------------------------------|
| Capacity building between the school and community                                                                                                                           | Fidelity                   | If the relationship between school and NGOs, and school and municipality has been strengthened                                                                                                                                                                                                                                                                                                             | Project coordinator survey 2                                                                |
|                                                                                                                                                                              | Adaptions                  | Context-specific adjustments and initiatives                                                                                                                                                                                                                                                                                                                                                               | Project coordinator survey 2; Project coordinator interview                                 |
|                                                                                                                                                                              | Dose                       | Extent to which the school has discussed smoke-free school hours implementation with NGOs and local municipality                                                                                                                                                                                                                                                                                           | Project coordinator survey 2                                                                |
|                                                                                                                                                                              | Quality of delivery        | Extent to which the schools has experienced support from the NGOs and local municipality                                                                                                                                                                                                                                                                                                                   | Project coordinator survey 2                                                                |
|                                                                                                                                                                              | Participant responsiveness | Attitudes towards integrating external resources in smoke-free school hours implementation                                                                                                                                                                                                                                                                                                                 | Staff survey 2                                                                              |
|                                                                                                                                                                              | Reach                      | For whom is the component implemented (sub-group analysis)                                                                                                                                                                                                                                                                                                                                                 | Facilitator questionnaire (NGOs)                                                            |
| Smoke-free school hours implementation                                                                                                                                       | Fidelity                   | If smoking is allowed during school hours and extent to which students experience smoking during school-hours                                                                                                                                                                                                                                                                                              | Staff survey 2; Staff survey 3; Student survey 2                                            |
|                                                                                                                                                                              | Adaptions                  | Context-specific adjustments in sanctioning and enforcement procedures and practice                                                                                                                                                                                                                                                                                                                        | Staff survey 2; Staff survey 3; Project coordinator interview                               |
|                                                                                                                                                                              | Dose                       | Extent to which students know the policy and extent of smoking visibility                                                                                                                                                                                                                                                                                                                                  | Student survey 2, Staff survey 2; Staff survey 3; Structured observations on school grounds |
|                                                                                                                                                                              | Quality of delivery        | Frequency and manner/method of enforcement                                                                                                                                                                                                                                                                                                                                                                 | Staff survey 2; Staff survey 3                                                              |
|                                                                                                                                                                              | Participant responsiveness | Attitudes towards the policy and whether staff experience the policy as a normal part of their work                                                                                                                                                                                                                                                                                                        | Student survey 2; Staff survey 2; Staff survey 3                                            |
|                                                                                                                                                                              | Reach                      | For whom is the component implemented (sub-group analysis)                                                                                                                                                                                                                                                                                                                                                 | Student survey 2; Staff survey 2; Staff survey 3                                            |
| <b>Mechanisms of change</b>                                                                                                                                                  |                            |                                                                                                                                                                                                                                                                                                                                                                                                            |                                                                                             |
| Interactions between the intervention and context-mechanisms i.e. reasoning and behavior among participants, constrained by e.g. organizational norms, values and discourses | Coherence                  | If and why smoke-free school hours makes sense given the situation the school currently face. Extant to which there's a shared understanding about the policy and the organizational members see the potential value of smoke-free school hours.                                                                                                                                                           | Management interview; Project coordinator interview;                                        |
|                                                                                                                                                                              | Cognitive participation    | If and how there's been established a community of practice around smoke-free school hours, if there's key people driving the implementation forward or the contrary and who. If it is seen as a legitimate part of the schoolwork and if there's been established new practices. Extent to which the organizational members are open to change their daily routines to work with smoke-free school hours. | Teacher focus groups; Staff survey 2; Staff survey 3                                        |
|                                                                                                                                                                              | Collective action          | If and how smoke-free school hours in enacted as part of routine practice including management practices e.g. how is the work organized and which resources are in place to support the implementation. To what extent the work can be integrated into the everyday school practices and whether people involved has sufficient skills and confidence in work with smoke-free school hours.                |                                                                                             |
|                                                                                                                                                                              | Reflexive monitoring       | If and how smoke-free school hours affect the everyday school life. Formel and informal appraisal procedures and reconfiguration.                                                                                                                                                                                                                                                                          |                                                                                             |

| <b>Sub-study 3: Outcomes</b> |                            |                                                                        |                  |
|------------------------------|----------------------------|------------------------------------------------------------------------|------------------|
| Baseline                     | Primary outcome measure    | Smoking during school hours (Y/N)                                      | Student survey 1 |
|                              | Secondary outcome measures | Number of cigarettes smoked per day, Intention to quit, Smoking status |                  |
|                              | Covariates                 | Age, gender, SES etc.                                                  |                  |
| Follow-up 1                  | Primary outcome measure    | Smoking during school hours (Y/N)                                      | Student survey 2 |
|                              | Secondary outcome measures | Number of cigarettes smoked per day, Intention to quit, Smoking status |                  |
|                              | Covariates                 | Age, gender, SES etc.                                                  |                  |
| Follow-up 2                  | Primary outcome measure    | Smoking during school hours (Y/N)                                      | Student survey 3 |
|                              | Secondary outcome measures | Number of cigarettes smoked per day, Intention to quit, Smoking status |                  |
|                              | Covariates                 | Age, gender, SES etc.                                                  |                  |

# BMJ Open

## Programme theory and realist evaluation of the 'Smoke-Free Vocational Schools' research and intervention project: a study protocol

|                                 |                                                                                                                                                                                                                                                                                                                                                                                                                                                                                                                                                                                                                                                                                           |
|---------------------------------|-------------------------------------------------------------------------------------------------------------------------------------------------------------------------------------------------------------------------------------------------------------------------------------------------------------------------------------------------------------------------------------------------------------------------------------------------------------------------------------------------------------------------------------------------------------------------------------------------------------------------------------------------------------------------------------------|
| Journal:                        | <i>BMJ Open</i>                                                                                                                                                                                                                                                                                                                                                                                                                                                                                                                                                                                                                                                                           |
| Manuscript ID                   | bmjopen-2020-042728.R2                                                                                                                                                                                                                                                                                                                                                                                                                                                                                                                                                                                                                                                                    |
| Article Type:                   | Protocol                                                                                                                                                                                                                                                                                                                                                                                                                                                                                                                                                                                                                                                                                  |
| Date Submitted by the Author:   | 29-Dec-2020                                                                                                                                                                                                                                                                                                                                                                                                                                                                                                                                                                                                                                                                               |
| Complete List of Authors:       | Hjort, Anneke; Steno Diabetes Center Copenhagen, Health Promotion Research; University of Southern Denmark, National Institute of Public Health<br>Christiansen, Tenna; Danish Cancer Society, Cancer Prevention & Information<br>Stage, Maria; Danish Cancer Society, Cancer Prevention & Information<br>Rasmussen, Kathrine; Danish Heart Foundation , Prevention<br>Pisinger, Charlotta; University of Copenhagen, Center for Clinical Research and Prevention; Danish Heart Foundation , Prevention<br>Tjørnhøj-Thomsen, Tine; University of Southern Denmark, National Institute of Public Health<br>Klinker, Charlotte; Steno Diabetes Center Copenhagen, Health Promotion Research |
| <b>Primary Subject Heading</b>: | Public health                                                                                                                                                                                                                                                                                                                                                                                                                                                                                                                                                                                                                                                                             |
| Secondary Subject Heading:      | Smoking and tobacco, Public health, Health policy                                                                                                                                                                                                                                                                                                                                                                                                                                                                                                                                                                                                                                         |
| Keywords:                       | PUBLIC HEALTH, Health policy < HEALTH SERVICES ADMINISTRATION & MANAGEMENT, QUALITATIVE RESEARCH, Protocols & guidelines < HEALTH SERVICES ADMINISTRATION & MANAGEMENT                                                                                                                                                                                                                                                                                                                                                                                                                                                                                                                    |
|                                 |                                                                                                                                                                                                                                                                                                                                                                                                                                                                                                                                                                                                                                                                                           |

SCHOLARONE™  
Manuscripts



I, the Submitting Author has the right to grant and does grant on behalf of all authors of the Work (as defined in the below author licence), an exclusive licence and/or a non-exclusive licence for contributions from authors who are: i) UK Crown employees; ii) where BMJ has agreed a CC-BY licence shall apply, and/or iii) in accordance with the terms applicable for US Federal Government officers or employees acting as part of their official duties; on a worldwide, perpetual, irrevocable, royalty-free basis to BMJ Publishing Group Ltd ("BMJ") its licensees and where the relevant Journal is co-owned by BMJ to the co-owners of the Journal, to publish the Work in this journal and any other BMJ products and to exploit all rights, as set out in our [licence](#).

The Submitting Author accepts and understands that any supply made under these terms is made by BMJ to the Submitting Author unless you are acting as an employee on behalf of your employer or a postgraduate student of an affiliated institution which is paying any applicable article publishing charge ("APC") for Open Access articles. Where the Submitting Author wishes to make the Work available on an Open Access basis (and intends to pay the relevant APC), the terms of reuse of such Open Access shall be governed by a Creative Commons licence – details of these licences and which [Creative Commons](#) licence will apply to this Work are set out in our licence referred to above.

Other than as permitted in any relevant BMJ Author's Self Archiving Policies, I confirm this Work has not been accepted for publication elsewhere, is not being considered for publication elsewhere and does not duplicate material already published. I confirm all authors consent to publication of this Work and authorise the granting of this licence.

# Programme theory and realist evaluation of the ‘Smoke-Free Vocational Schools’ research and intervention project: a study protocol

Anneke Vang Hjort<sup>1,2</sup>, Tenna Børsting Christiansen<sup>3</sup>, Maria Stage<sup>3</sup>, Kathrine Højlund Rasmussen<sup>4</sup>, Charlotta Pisinger<sup>4,5</sup>, Tine Tjørnhøj-Thomsen<sup>2</sup> & Charlotte Demant Klinker<sup>1</sup>

1: Steno Diabetes Center Copenhagen, Health Promotion Research, Niels Steensens Vej 6, 2820 Gentofte, Denmark

2: The University of Southern Denmark, The National Institute of Public Health, Studiestræde 6, 1455 Copenhagen K, Denmark

3: The Danish Cancer Society, Cancer Prevention & Information, Strandboulevarden 49, 2100 Copenhagen, Denmark

4: The Danish Heart Foundation, Prevention, Vognmagergade 7, 1120 Copenhagen K, Denmark

5: University of Copenhagen, Center for Clinical Research and Prevention, Nordre Fasanvej 57, 2000 Frederiksberg, Denmark

---

Anneke Vang Hjort: [anneke.vang.hjort@regionh.dk](mailto:anneke.vang.hjort@regionh.dk)

Tenna Børsting Christiansen: [tennabc@cancer.dk](mailto:tennabc@cancer.dk)

Maria Stage: [marsta@cancer.dk](mailto:marsta@cancer.dk)

Kathrine Højlund Rasmussen: [kath86@live.com](mailto:kath86@live.com)

Charlotta Pisinger: [charlotta.pisinger@regionh.dk](mailto:charlotta.pisinger@regionh.dk)

Tine Tjørnhøj-Thomsen: [titt@sdu.dk](mailto:titt@sdu.dk)

Charlotte Demant Klinker: [charlotte.demant.klinker@regionh.dk](mailto:charlotte.demant.klinker@regionh.dk) (corresponding author)

Word count: 4132 words excluding title page, abstract, figures and tables, declarations, and references.



## ABSTRACT

**Introduction:** Smoke-free school hours (SFSH) entails a smoking ban during school hours and might be an effective intervention to reduce the high smoking prevalence in vocational schools. For SFSH to be effective, the policy must be adequately implemented and enforced; this challenge for schools constitutes a research gap. The ‘Smoke-Free Vocational Schools’ research and intervention project has been developed to facilitate schools’ implementation of SFSH. It is scheduled to run from 2018–2022, with SFSH being implemented in 11 Danish vocational schools. This study protocol describes the intervention project and evaluation design research and intervention project.

**Methods and analysis:** The intervention project aims to develop an evidence-based model for implementing SFSH in vocational schools and similar settings. The project is developed in a collaboration between research and practice. Two public health NGOs are responsible for delivering the intervention activities in schools, while the research partner evaluates what works, for whom, and under what circumstances. The intervention lasts one year per school, targeting different socioecological levels. During the first six months, activities are delivered to stimulate organisational readiness to implement SFSH. Then, SFSH is established, and during the next six months, activities are delivered to stimulate implementation of SFSH into routine practice. The epistemological foundation is realistic evaluation. The evaluation focuses on both implementation and outcomes. Process evaluation will determine the level of implementation and explore what hinders or enables SFSH becoming part of routine practice using qualitative and quantitative methods. Outcomes evaluation will quantitatively assess the intervention’s effectiveness, with the primary outcome measure being changes in smoking during school-hours.

**Ethics and dissemination:** Informed consent will be obtained from study participants according to the GDPR and Danish data protection law. The study adheres to Danish ethics procedures. Study findings will be disseminated at conferences and further published in open-access peer-reviewed journals.

### Strengths and limitations:

- The study draws on realistic evaluation and aims to answer both research and practice needs by generating new application-oriented knowledge on how to implement smoke-free school hours in vocational schools and similar settings.
- The study includes both implementation/process evaluation and outcomes evaluation in a unified multi-methods study design.
- The intervention has been developed in a joint venture between research and practice that emphasises including practice-based experience and research evidence, which may generate high external validity and more sustainable implementation practices.
- It is a limitation to the internal validity, that the study seeks to assess outcomes without the use of control schools. However, the practice is considered appropriate in realistic evaluation.
- The study seeks to integrate both qualitative and quantitative methods, which is a methodological challenge, as the methods represent different epistemological paradigms.

## INTRODUCTION

From August 2021, a school tobacco policy (STP) of smoke-free school hours (SFSH) is expected to be ratified in all Danish educational institutions with at least one student aged under 18. The policy basically stipulates a smoking ban for students during school hours – both inside and outside school grounds. An expanded definition of SFSH also bans smoking by school staff, managers and visitors (smoke-free work hours). Additionally, SFSH might include all tobacco-related products (e.g. cigarettes, vapers, and snuff). SFSH is an expansion of traditional STPs, which do not prohibit smoking outside school grounds.<sup>1</sup> The rationale is the same: restricting smoking behaviour as a means to prevent exposure to second-hand smoke, smoking initiation, and smoking continuation among adolescents and young adults.<sup>2,3</sup> Restricting smoking behaviour can further be linked to political denormalization strategies aiming to make the future smoke-free: a tobacco endgame.<sup>4</sup> Evidence about SFSH is sparse, but some researchers<sup>5</sup> suggest that it might be more effective than traditional STPs, which have been shown to relocate smoking to just outside school premises (e.g. at the school entrance), and therefore do not remove smoking visibility.<sup>5,6</sup> Additionally, traditional STPs can have adverse effects on students with lower socioeconomic status (SES), (lower odds of anti-smoking social beliefs)<sup>7</sup>, which suggest that SFSH might be a more appropriate strategy in schools with low SES groups, such as vocational schools.

In Denmark, vocational education and training (VET) is a short, practical upper-secondary education for a specific service or industry, such as hairdresser, carpenter, office assistant, or chef. It is characterised by a combination of traditional in-school education and out-of-school apprenticeship in the future workplace. Danish vocational students have low SES backgrounds<sup>8</sup> and are overrepresented in smoking behaviour: 29% smoke daily, compared to 9% in general upper-secondary education.<sup>9,10</sup> The average vocational student age is 24, but as 14% of these students are aged 15–17,<sup>11</sup> the SFSH law will apply to Danish vocational schools. As such, the law has considerable health-promoting potential: it may not only reduce smoking within a vulnerable population group setting (vocational schools) but also contribute towards decreasing health inequality.<sup>12</sup> However, policies which are not well-implemented will not improve health.<sup>13–16</sup> We conceptualise the implementation of SFSH as a school organisational process with the end-goal of incorporating the policy into routine practice.<sup>17</sup> Staff and managers must enact and enforce the policy as part of their professional duties, and students must experience the policy as an accepted part of their everyday school life. Hence, enforcement is a significant task of organisational

1  
2  
3  
4 implementation.<sup>16,18–20</sup> Despite legislation imposing STPs in many secondary schools across Europe,  
5 they are often poorly implemented and enforced.<sup>21–24</sup>  
6  
7

8  
9 Three reviews have systematised decades of evidence related to STP implementation. The 2014  
10 systematic review by Galanti et al.<sup>15</sup> identified implementation components that improve STPs'  
11 impact on student smoking behaviour (e.g. strict and consistent enforcement). However, the authors  
12 also showed that most studies do not measure implementation fidelity and that enforcement is  
13 inconsistently operationalised across studies.<sup>15</sup> Two realist reviews,<sup>5,16</sup> as part of the SILNE-R project  
14 (2015–2018),<sup>25</sup> yield prominent new insights into the functioning of STPs. The first shows how STPs'  
15 implementation and comprehensiveness affects students' beliefs and behaviour: for example, if  
16 smoking is not visible during school hours, students feel less pressure to conform to others' smoking  
17 behaviour.<sup>5</sup> The second shows that staff enforcement depends on whether they 1) believe that STP  
18 enforcement is their role and duty, 2) have confidence to deal with students' negative responses when  
19 enforcing the rules, and 3) experience enforcement having a positive impact on students.<sup>16</sup> Other  
20 recent studies<sup>26–28</sup> have explored which practices facilitate or hinder adopting SFSH; one key finding  
21 is that schools should develop a shared understanding about the policy being part of their jurisdiction  
22 prior to implementation).<sup>26–28</sup> Seen together, the studies point towards important elements for schools  
23 to consider when implementing SFSH, but do not provide knowledge about what activities and  
24 processes can stimulate better implementation. In other words, most studies focus on understanding  
25 existing STPs rather than generating new knowledge about how to facilitate implementation. The  
26 latter might only be possible using interventionist study designs. One intervention study provides an  
27 important measure of STP implementation fidelity.<sup>29</sup> To the best of our knowledge, however, no  
28 intervention studies have examined how to stimulate or measure the process of implementing SFSH  
29 into routine practice. As such, it remains unclear how to best support, stimulate, and measure the  
30 implementation of SFSH.  
31  
32  
33  
34  
35  
36  
37  
38  
39  
40  
41  
42  
43  
44  
45  
46

47 To address the identified research gap, we developed the 'Smoke-Free Vocational Schools'  
48 intervention project, which aims to facilitate implementing SFSH in vocational schools and to  
49 generate new knowledge about the implementation and effectiveness of SFSH. The intervention takes  
50 place in 11 Danish vocational schools from 2018–2022.  
51  
52  
53  
54

### 55 **Realistic evaluation**

56 Realistic evaluation (RE) is the epistemological foundation of the evaluation. Pawson and Tilley  
57 developed the RE approach, arguing that to generate application-oriented knowledge for policy and  
58  
59  
60

1  
2  
3  
4 practice, it is more useful to address ‘what works, for whom and under what circumstances’, rather  
5 than evaluating whether an intervention ‘works’.<sup>30</sup> According to RE, interventions might generate  
6 different outcomes (O) in different contexts (C) by triggering underlying changes in reasoning and  
7 behaviour among participants – conceptualised as mechanisms (M).<sup>31</sup> As such, interventions may  
8 ‘work’ by enabling participants to make different choices, but the choices are always constrained by  
9 a context, such as the organisational norms, values, and discourses that operate in school settings.  
10 ‘Complex intervention’ is used to describe innovations within highly complex and emergent social  
11 systems,<sup>32</sup> such as schools.<sup>33–34</sup> It can be understood in relation to the RE notion of ‘open systems’,  
12 defined by Pawson and Tilley<sup>30</sup> as ‘[T]he acknowledgement that programs are implemented in a  
13 changing and permeable social world, and that program effectiveness may thus be subverted or  
14 enhanced through the unanticipated intrusion of new contexts’ (p. 218). Hence, the overall RE  
15 methodology is to examine  $C + M = O$  relations in complex interventions, known as CMO  
16 configurations.<sup>30</sup>

### 27 **Study aim**

28  
29 In reporting complex interventions, the intervention and evaluation design must be clearly described  
30 to enable replication and synthesis of evidence,<sup>35,36</sup> yet many RE studies inadequately report their  
31 methodological practices.<sup>37–39</sup> Therefore, the aim of this study protocol is two-fold: 1) to describe the  
32 Smoke-Free Vocational Schools intervention, and 2) to present how the intervention is evaluated,  
33 including the study design, specific methods, and theoretical assumptions.

## 38 **METHODS AND ANALYSIS**

39  
40 The overall objective of the Smoke-Free Vocational Schools intervention project is to develop an  
41 evidence-based model for implementing SFSH in Danish vocational schools and comparable settings.  
42 To accomplish the objective, the study examines what works, for whom, and under what  
43 circumstances. RE starts with the development of an initial programme theory (IPT).<sup>39</sup> Programme  
44 theory is theory incarnate, explicitly explaining which context-mechanisms should be triggered  
45 among different actors to produce desired outcomes.<sup>40,41</sup> In relation to the Smoke-Free Vocational  
46 Schools intervention, the IPT represents a hypothesis on how and why to implement SFSH and the  
47 study design is developed to test the hypothesis. We have structured this study protocol following the  
48 steps of the realist research cycle,<sup>39,42</sup> as shown in figure 1. The content was further informed by the  
49 SPIRIT (Standard Protocol Items for Randomized Trials) statement.

50  
51  
52  
53  
54  
55  
56  
57  
58 >> Insert Figure 1 here <<  
59  
60

## Step 1: Programme theory

The intervention project is a collaboration between research and practice. Two Danish public health NGOs – the Danish Heart Foundation and the Danish Cancer Society – are practice partners, while Steno Diabetes Centre Copenhagen is the research partner. The practice partners are responsible for delivering the intervention activities in schools; the research partner is responsible for conducting a formative evaluation of the implementation processes and outcomes. The research and practice partners together developed the IPT, and it is part of our method to continually discuss and apply preliminary research findings as part of the formative evaluation. As such, we follow the proposal of RE<sup>37</sup> by iteratively testing and developing the programme theory in parallel to new empirical learnings.

The IPT was developed through a workshop where research and practice worked collaboratively. The practice partners contributed their extensive first-hand experience of implementing tobacco preventive efforts in different school contexts: for example, the Danish Cancer Society has tailored a motivational interviewing course to support smoking cessation by upper-secondary school students. The translation of practice-based experience and ideas into the intervention might increase the sustainability of implementation practices and improve external validity.<sup>43</sup> The research partner contributed with evidence on effective tobacco preventive methods in vocational schools, based on recent research and the results from a qualitative study on facilitators and barriers for implementing SFSH.<sup>28</sup> At the workshop, we developed a graphic representation of the intervention,<sup>44</sup> including the short- and long-term outputs, outcomes, and impact expected of different intervention activities targeting actors within and outside the school. The workshop process also served as a learning and management tool, as the research and practice partners developed a shared understanding on how the intervention is expected to produce change, which is crucial in public health interventions.<sup>45</sup>

### The Smoke-Free Vocational Schools intervention

The intervention is delivered in two phases, each lasting approximately six months (as shown in figure 2). During phase 1, activities are delivered to stimulate organisational readiness<sup>46</sup> to implement SFSH: these include preparing staff and managers for their new professional tasks, and establishing new school-break facilities for students as alternatives to social smoking. At the beginning of phase 2, SFSH is established. During phase 2, activities are delivered to stimulate the gradual implementation of SFSH into routine practice by supporting schools in addressing emergent challenges, such as nicotine dependence or enforcement. Table 1 describes all the intervention activities.

>> Insert Figure 2 here <<

The activities are expected to produce short-term outputs, which are operationalised in four sets according to ecological levels<sup>47</sup>: 1) individual guidance, e.g. smoking cessation assistance for students (individual); 2) organisational development, e.g. development of professional skills and confidence to enforce SFSH (interpersonal); 3) physical environment changes, e.g. new school-break activities (structural/organisational); and 4) capacity building between school and community, e.g. increased cooperation between the school and the local municipality (community).

**Table 1** Description of intervention activities in the Smoke-Free Vocational Schools intervention.

| Activity                                   | Description                                                                                                                                                                                      | Purpose                                                                                                                                                                                                                                  | Participants                                                                                                                                           |
|--------------------------------------------|--------------------------------------------------------------------------------------------------------------------------------------------------------------------------------------------------|------------------------------------------------------------------------------------------------------------------------------------------------------------------------------------------------------------------------------------------|--------------------------------------------------------------------------------------------------------------------------------------------------------|
| Phase 1                                    |                                                                                                                                                                                                  |                                                                                                                                                                                                                                          |                                                                                                                                                        |
| First meeting                              | An initial meeting between the schools and practice partners, where the SFSH implementation plan is discussed.                                                                                   | To ensure that the schools have a clear implementation plan and know how the intervention activities can support them.<br>To clarify role distributions between different stakeholders.                                                  | Practice partners.<br>School principal and other management representatives.<br>School project coordinator.<br>Local municipality representative.      |
| Developing the SFSH policy                 | The schools develop their SFSH policy, including rules and responsibilities for sanctioning and enforcement. The practice partners provide inspirational material, e.g. other schools' policies. | To ensure the schools develop a clear SFSH policy, which aligns with the schools' rules of conduct.                                                                                                                                      | Decided locally in schools.<br>Practice partners recommend that schools establish a working group including both management and staff representatives. |
| Developing the SFSH communication strategy | The schools develop their internal and external SFSH communication strategy. The practice partners provide inspirational material and financial support to smoke-free signing.                   | To ensure that all organisational members (e.g. students and staff) and relevant external stakeholders (e.g. neighbours and apprenticeship workplaces) know what SFSH entails.                                                           | Decided locally in schools.                                                                                                                            |
| Workshop 1 on SFSH implementation          | A joint meeting at the schools for all school staff and managers, facilitated by the practice partners.                                                                                          | To stimulate a joint vision and understanding of why the school is implementing SFSH.<br>To ensure that all organisational members feel confident to enforce SFSH.<br>To address school-specific challenges and issues, e.g. resistance. | Practice partners.<br>All school staff and managers.<br>Local municipality representative.                                                             |
| Motivational interviewing course           | A selected group of school staff and managers attend a two-day course delivered by the practice partners.                                                                                        | To provide new knowledge and skills for the selected staff and managers, who are supposed to become key drivers of the implementation in school.<br>To help nicotine-addicted students to cope with not smoking during school hours.     | Practice partners.<br>Selected school staff and managers including the school project coordinator.<br>Local municipality representative.               |
| Smoking cessation assistance               | Offered to students and staff in collaboration with the local municipality.<br>The type of assistance varies between municipalities, depending on local resources and availabilities.            | To help motivated staff and students quit smoking.                                                                                                                                                                                       | Students and staff.<br>Local municipality representative.                                                                                              |

|                                             |                                                                                                                                                                                                                                                          |                                                                                                                                                         |                                                                                                                                                                                          |
|---------------------------------------------|----------------------------------------------------------------------------------------------------------------------------------------------------------------------------------------------------------------------------------------------------------|---------------------------------------------------------------------------------------------------------------------------------------------------------|------------------------------------------------------------------------------------------------------------------------------------------------------------------------------------------|
| Student workshop                            | A participatory student workshop on how to improve the social environment, delivered in schools by the practice partners. The schools are given financial support (averaging 15,000 € per school) to establish some of the best school-break activities. | To create alternatives to smoking communities at school.<br>To ensure that the new school-break activities are relevant for the students.               | Practice partners.<br>Selected group of students.<br>Local municipality representative.<br>The school management and school project coordinator approve the new school-break activities. |
| Removal of smoking facilities               | The schools remove smoking facilities, e.g. ashtrays.                                                                                                                                                                                                    | To signal that the school is smoke-free.                                                                                                                | Decided locally in schools.                                                                                                                                                              |
| Phase 2                                     |                                                                                                                                                                                                                                                          |                                                                                                                                                         |                                                                                                                                                                                          |
| The school tobacco policy of SFSH           | The SFSH policy is established in schools. The schools must enact and enforce the policy.                                                                                                                                                                | To prevent exposure to second-hand smoke.<br>To prevent smoking initiation and continuation.                                                            | Decided locally in schools.<br>Practice partners recommend that all school staff and managers play a role in enforcement.                                                                |
| Continued smoking cessation assistance      | Smoking cessation assistance is offered to students and staff in collaboration with the local municipality.<br>The type of smoking cessation assistance varies between municipalities, depending on local resources and availabilities.                  | To help motivated staff and students quit smoking.                                                                                                      | Students and staff.<br>Local municipality representative.                                                                                                                                |
| Network activities for intervention schools | A network for intervention schools is established by the practice partners. Two larger network activities for all schools are delivered during 2018–2020.                                                                                                | To facilitate schools exchanging experiences of implementing SFSH and learning from one another.                                                        | School principal and school project coordinator are invited.<br>Participation in network activities will be decided locally in schools.                                                  |
| Schools' own initiatives                    | Supportive actions which ease the implementation of SFSH.                                                                                                                                                                                                | Decided locally by schools.                                                                                                                             | Decided locally by schools.                                                                                                                                                              |
| Workshop 2                                  | A joint meeting at the schools for all staff and managers, facilitated by the practice partners.                                                                                                                                                         | To address school-specific challenges in relation to implementing SFSH.                                                                                 | Practice partners.<br>All school staff and managers.<br>Local municipality representative.                                                                                               |
| Final meeting                               | A final meeting between the schools and practice partners to discuss the SFSH maintenance plan.                                                                                                                                                          | To ensure the schools have a clear maintenance plan and know how the municipality and practice partners can support them after the intervention period. | Practice partners.<br>School principal.<br>School project coordinator.<br>Local municipality representative.                                                                             |

SFSH: Smoke-free school hours.

The activities and outputs are together expected to produce ‘mechanisms of change’, which are the underlying changes in reasoning and behaviour among participants, triggered by the intervention and the intervention context. We expect that the central context-mechanisms allowing SFSH to become part of routine practice will be found at the organisational level, where school staff and managers take responsibility for SFSH, feel confident to enforce SFSH, and feel motivated by positive student responses.<sup>16</sup> At the student level, we expect context-mechanisms to be triggered by: 1) staff and managers enforcing SFSH, resulting in decreased smoking visibility and, in turn, students becoming less prone to conform to others’ smoking behaviour;<sup>5</sup> and 2) the new school-break activities resulting

1  
2  
3  
4 in new practices and social norms at school.<sup>48</sup> As such, we expect SFSH to become a natural and  
5 accepted part of students' everyday school life.  
6  
7

8 The mechanisms of change are expected to result in outcomes related to students' smoking behaviour.  
9 Our primary outcome measure is 'changes in smoking during school hours', while the secondary  
10 outcome measure is 'changes in the number of cigarettes smoked per day'; both are proximal  
11 outcomes. The intermediate outcome measures are 'changes in intention to quit' and 'changes in  
12 smoking status'. The long-term impact of the intervention will not be evaluated as part of this study.  
13  
14  
15  
16  
17

## 18 19 **Step 2: Study design**

20 The study is designed to test the IPT through focusing on both implementation/process evaluation  
21 and outcomes evaluation. As considered most appropriate in RE,<sup>30,37</sup> we use a multi-methods design,  
22 which allows us to quantify some elements of CMO configurations (e.g. changes in smoking  
23 behaviour) and qualitatively explore the change mechanisms and context.<sup>49</sup> The process evaluation  
24 investigates to what extent the intervention activities have been delivered and are implemented  
25 according to the programme theory, and seeks to explore the mechanisms that hinder or enable SFSH  
26 becoming part of routine practice. The outcomes evaluation assesses the intervention's outcomes in  
27 terms of students' smoking behaviour, using a one-group pretest-posttest study design, with sub-  
28 group analysis further determining for whom the intervention is most effective.  
29  
30  
31  
32  
33  
34  
35

36 The intervention is delivered at 11 schools during 2018–2020, seven of which are included in the  
37 evaluation. The remaining four are considered 'pilot schools', where the intervention activities and  
38 evaluation methods (e.g. questionnaires) are tested and adjusted. The practice partners recruited  
39 schools that wanted to implement the expanded version of SFSH, banning all tobacco-related  
40 products (e.g. cigarettes, vapers, and snuff) during school and work hours for students, staff, and  
41 visitors. The sample of seven vocational schools accounts for 10% of all Danish vocational schools;  
42 represents all four main educational areas (Technical, Business, Agriculture and food services, and  
43 Social and health services); and covers three (out of five) geographical regions. As such, the study  
44 sample includes a broad variety of vocational school contexts across the country and is, thus,  
45 considered representative of all Danish vocational schools.  
46  
47  
48  
49  
50  
51  
52  
53  
54  
55  
56  
57  
58  
59  
60



## Process evaluation

The process evaluation comprises two mutually informing parts based on the RE-compatible<sup>50</sup> Medical Research Councils guidelines for Process Evaluation of Complex Interventions.<sup>35</sup> Our operationalisation of the framework in the study is shown in figure 3.

>> Insert Figure 3 here <<

The 'Implementation degree' study quantitatively measures implementation levels for each of the four sets of outputs and for the SFSH policy based on fidelity, adaptations, dose, quality of delivery, participant responsiveness, and reach. Hence, the study seeks to occupy a middle position in the fidelity vs. adaptations debate<sup>50</sup> with an emphasis on measuring both central intervention implementation (e.g. extent of enforcement) and the schools' contextual initiatives and tailoring (e.g. means and methods of enforcement). The 'Mechanisms of change' study explores the implementation processes using both qualitative and quantitative methods. Normalisation process theory<sup>17</sup> proposes that implementation processes are shaped and motivated by four generative mechanisms – coherence, cognitive participation, collective action, and reflexive monitoring. This will be the guiding theory in the investigation of processes that hinder or enable SFSH becoming part of routine practice.

## Outcomes evaluation

The outcomes evaluation assesses the effectiveness of the intervention in terms of the primary and secondary outcomes, measured before SFSH (Time 1, T1), six months after the establishment of SFSH (Time 2, T2), and twelve months after the establishment of SFSH (Time 3, T3), as shown in figure 4. The primary outcome measure is changes in 1) smoking during school hours (dichotomous variable (yes/no)); the secondary outcome measures are changes in 2a) the number of cigarettes smoked per day (continuous variable), 2b) intention to quit (nominal variable), and 2c) smoking status (nominal variable). Further, to elaborate on CMO configurations, sub-group analyses are performed to investigate for whom the intervention is most effective and to explore relations between findings from the process evaluation, that is, the SFSH implementation fidelity measure and quantitative indicators of implementation processes. The study thus seeks to elaborate on outcomes across the programme but also considers outcomes for different subgroups within the population without using control schools, which is considered appropriate for RE.<sup>37,51,52</sup>

>> Insert Figure 4 here <<

## Step 3: Data collection

The evaluation lasts approximately 1.5 years per school and covers intervention phase 1 (six months) and intervention phase 2 (six months), with the final follow-up conducted six months after the

1  
2  
3  
4 intervention has ended. During this time period, qualitative and quantitative data will be collected  
5 from students, staff, and managers to increase the validity of findings.<sup>53</sup> Table 2 presents an overview  
6 of all data collection measures and procedures, including estimates of eligible participants and  
7 expected response rates. The different data collection measures provide cross-cutting insights for the  
8 process and outcomes evaluations. A preliminary operationalisation of how the data contribute to  
9 each is presented in Supplementary File 1.  
10  
11  
12  
13  
14

### 15 Student surveys

16 Electronic student surveys are conducted during school hours at three different time points. Students  
17 self-report smoking behaviour<sup>54</sup> and intention to quit,<sup>55</sup> smoking-related rules and practices and social  
18 norms at school,<sup>56–61</sup> self-efficacy,<sup>62–64</sup> well-being,<sup>65,66</sup> educational information, and demographics.  
19 Validated questions have been used when possible and the questionnaire has been pilot-tested in two  
20 vocational school classes (n=30 participants) to ensure face validity.<sup>67</sup> Due to the VET school  
21 structure, combining in-school education and apprenticeships, individual follow-up is rarely possible.  
22 Instead, both paired data from the same individuals and cross-sectional data will be collected. To  
23 maximise response rates, data collection is organised by the research partners in each school and  
24 conducted during school hours. The students are given time to complete the questionnaire and ask  
25 questions. The survey takes approximately 30 minutes per school class. Based on experience with the  
26 procedure,<sup>9</sup> we expect that 95% of students will participate in the study.  
27  
28  
29  
30  
31  
32  
33  
34  
35

### 36 *Sample size calculation*

37 The outcome measure used to determine sample size is change in the number of cigarettes smoked  
38 during school hours per day, per student, based on individual follow-up data. We assume that 30%  
39 are daily smokers who averagely smoke 18 cigarettes per day, including 8 during school hours.<sup>68</sup> We  
40 assume that the intervention will reduce smoking intensity during school hours by 50%, meaning a  
41 reduction of 4 cigarettes smoked per school day (with a standard deviation of 4 and 3 and correlation  
42 = 0.3). To avoid type-I errors and type-II errors, we respectively chose a 5% significance level and  
43 power at 80%. Assuming that the data are normally distributed, we will need to conduct individual  
44 follow-up on 11 daily smokers per school. We expect a 30% reduction in participants from baseline  
45 to follow-up. Accounting for this, the sample size must include 14.3 daily smokers per school. Thus,  
46 if the smoking prevalence is 30%, 24.4 students per school must participate in the prospective study.  
47 As seven schools are participating, the sample size for the prospective study must include (at least)  
48 171 students.  
49  
50  
51  
52  
53  
54  
55  
56  
57  
58  
59  
60

### Staff and project coordinator surveys

Staff and project coordinator surveys are electronically distributed to all school organisational members – i.e. managers, teaching staff, counsellors, administrative and kitchen staff, etc. – at three different time points to follow the gradual implementation of SFSH. It is important to include all organisational members as all are expected to be affected by SFSH. The surveys include questions to investigate the implementation degree (e.g. fidelity, dose) and the validated NoMAD scale<sup>69,70</sup> to grasp the implementation processes. The project coordinator surveys include additional questions about the implementation work (e.g. collaboration with the NGO partners, local municipality and contextual tailoring). The surveys have been pilot-tested among staff, managers, and project coordinators at the four pilot schools (n=23 participants) to ensure face validity.<sup>67</sup> Surveys distributed to NGOs partners both before and after SFSH explore their role in facilitating meetings.

### Structured observations

Structured observations on school grounds are carried out by the researchers at the same time points as the student surveys. Inspired by other studies,<sup>71,72</sup> the structured observations will include observations on smoking visibility (e.g. who, where, and how many smokers are visible during school hours) and physical environment changes (e.g. smoke-free signing and removal of smoking facilities). Data will be registered as field notes.

Interviews and focus groups with principal manager, project coordinator, and teachers  
Semi-structured individual interviews and focus groups with school principals, project coordinators, and teachers are carried out to explore the implementation processes in terms of intervention modalities, change mechanisms, and context features.<sup>73</sup> It is important to gather interview material from the different respondent groups as they provide different perspectives, challenges, and opportunities in relation to implementing SFSH. Specifically, school principals have decision-making power on SFSH and knowledge about school strategic-political processes; project coordinators have in-depth knowledge and experience of all actions for implementing SFSH; and teachers have direct contact with students and are expected to play a large role in enforcing SFSH. During interviews the role of the NGO partners is also explored.

**Table 2** Overview of data in the Smoke-Free Vocational Schools intervention project, including eligible participants (n), expected response rates (n), and data collection procedures.

| Data collection  | When        | N (eligible) | N (expected) | Procedure                                                                                                                   |
|------------------|-------------|--------------|--------------|-----------------------------------------------------------------------------------------------------------------------------|
| Student survey 1 | Before SFSH | 3,000        | 2,000        | Baseline measure focusing on smoking behaviour, etc. Electronic questionnaire distributed by the research team (in school). |

|                                           |                       |       |       |                                                                                                                                                                                                                                                      |
|-------------------------------------------|-----------------------|-------|-------|------------------------------------------------------------------------------------------------------------------------------------------------------------------------------------------------------------------------------------------------------|
| Structured observations on school grounds | Before SFSH           | NA    | NA    | Structured observations focusing on smoke-free signing, smoking facilities, and smoking visibility (in school).                                                                                                                                      |
| Staff survey 1                            | Before SFSH           | 1,200 | 600   | Electronic questionnaire distributed to all staff and managers about SFSH preparation (email).                                                                                                                                                       |
| Project coordinator survey 1              | Before SFSH           | 7     | 7     | In-depth electronic questionnaire concerning SFSH preparation (email).                                                                                                                                                                               |
| Principal manager interview               | Before SFSH           | 7     | 7     | Semi-structured interview focusing on SFSH preparation, including motivation and past experiences (in school or via Skype).                                                                                                                          |
| Student survey 2                          | 6 months after SFSH   | 3,000 | 2,000 | Follow-up 1 measure focusing on smoking behaviour, etc. Electronic questionnaire distributed by the research team (in school).                                                                                                                       |
| Structured observations on school grounds | 6 months after SFSH   | NA    | NA    | Structured observations focusing on smoke-free signing, smoking facilities, and smoking visibility (in school).                                                                                                                                      |
| Staff survey 2                            | 6 months after SFSH   | 1,200 | 600   | Electronic questionnaire distributed to all staff and managers about the gradual SFSH implementation (email).                                                                                                                                        |
| Project coordinator survey 2              | 6 months after SFSH   | 7     | 7     | In-depth electronic questionnaire about the gradual SFSH implementation (email).                                                                                                                                                                     |
| Staff focus group                         | 6–8 months after SFSH | 21–42 | 21–42 | Focus groups with teaching staff, counsellors, and/or others assigned a special role in relation to SFSH. Focusing on daily practice, reasoning, and how/if the intervention has supported the gradual SFSH implementation (in school or via Skype). |
| Project coordinator interview             | 6–8 months after SFSH | 7     | 7     | Semi-structured interview focusing on daily practice, reasoning, and how/if the intervention has supported the gradual SFSH implementation (in school or via Skype).                                                                                 |
| Student survey 3                          | 12 months after SFSH  | 3,000 | 2,000 | Follow-up 2 measure focusing on smoking behaviour, etc. Electronic questionnaire distributed by the research team (in school).                                                                                                                       |
| Structured observations on school grounds | 12 months after SFSH  | NA    | NA    | Structured observations focusing on smoke-free signing, smoking facilities, and smoking visibility (in school).                                                                                                                                      |
| Staff survey 3                            | 12 months after SFSH  | 1,200 | 600   | Electronic questionnaire distributed to all staff and managers about the gradual SFSH implementation (email).                                                                                                                                        |
| Facilitator survey (NGOs)                 | Before and after SFSH | NA    | NA    | Electronic questionnaire distributed to the practice partners in relation to different intervention activities, i.e. student and staff workshops and courses.                                                                                        |

SFSH: Smoke-free school hours.

## Step 4: Data analysis

### Process evaluation

Implementation levels are assessed using confirmatory factor analysis.<sup>74</sup> Inspired by Bast et al.,<sup>29</sup> data are used to develop indexes of low and high implementation degree, while associations between the outputs and the overall SFSH implementation fidelity model are analysed using regression analysis. This allows us to investigate to what extent the intervention activities predict the implementation degree of SFSH. Mechanisms of change are explored by combining qualitative and quantitative data and by using the generative mechanisms proposed by normalisation process theory (coherence,

1  
2  
3  
4 cognitive participation, collective action, and reflexive monitoring) to structure the analysis.  
5 Qualitative data will be coded using an abductive approach, whereas quantitative data will be  
6 analysed using descriptive techniques to further explain, supplement, or challenge the qualitative  
7 analyses of what enables or hinders SFSH becoming part of routine practice.  
8  
9  
10

## 11 Outcomes evaluation

12 The outcomes evaluation uses multi-level linear or logistic regression, depending on the outcome  
13 measures.<sup>75</sup> The primary analysis will be a two-level model, with students (level 1) nested in schools  
14 (level 2). In secondary analysis, we will investigate effects according to pre-defined subgroups, such  
15 as sex, age, and SES. To further elaborate on CMO configurations, we will test the associations  
16 between quantitative measures of implementation degree and implementation processes from the  
17 process evaluation, using descriptive analysis, logistic regression, and/or factor analysis.<sup>76,77</sup>  
18  
19  
20  
21  
22  
23  
24

## 25 Step 5: Synthesis

26 Empirical and theoretical knowledge about the implementation and outcomes of the intervention will  
27 be synthesised into recommendations on how to implement SFSH. RE advocates using retrodution  
28 and abduction in iterative processes to test and refine IPT.<sup>37,73,78</sup> Retrodution is a form of inference  
29 that seeks to identify and verify the mechanisms theorised to have generated the phenomena under  
30 study,<sup>73,78</sup> whereas abduction is the process of describing empirical data using theoretical concepts,<sup>73</sup>  
31 with emphasis on analysing data that fall outside an initial theoretical frame or premise.<sup>78,79</sup> Regarding  
32 the Smoke-Free Vocational Schools intervention project, our goal is to integrate qualitative and  
33 quantitative findings from the process and outcomes evaluations to re-analyse the IPT in terms of  
34 what works, for whom, and under what circumstances, using a retroductive-abductive approach.  
35 Based on the refined programme theory, we will be able to develop model recommendations for  
36 implementing SFSH in vocational schools and similar settings.  
37  
38  
39  
40  
41  
42  
43  
44  
45  
46  
47  
48  
49  
50  
51  
52  
53  
54  
55  
56  
57  
58  
59  
60

## Patient and Public Involvement

This study protocol describes a health promotion intervention and no patients have been involved. Public involvement, defined as collaboration with public health partners with knowledge on the VET school setting, has been extensive. The partnering NGO organizations and research institution have worked closely together and collaborated and agreed on the design of the intervention and evaluation. The NGO partners have been involved in the development of the research questions and on choosing the outcome measures and are co-authoring this study protocol. The NGO partners recruited the VET schools and supported the schools in the implementation of SFSH. The evaluation results will be disseminated to NGO partners, VET schools and students through SoMe news and a short 2-page publication in layman language.

## ETHICS AND DISSEMINATION

In public health interventions it is important to examine and clarify possible negative reverse effects, so as to avoid further interventions generating the same negative effects.<sup>80</sup> Therefore, unexpected consequences of the intervention will be explored and reported to minimise and avoid participants feeling stigmatised in this study and similar future studies.

The study has been reported to the Capital Region of Denmark's legal centre for personal data handling (journal number: VD-2018-485). Informed consent will be obtained from all study participants according to the General Data Protection Regulation and Danish data protection law. The study adheres to the ethics procedures in Denmark. Study findings will be disseminated at international and national conferences and further published in open-access peer-reviewed journals. Also, the study findings will be used by the practice partners in their further work supporting schools implementing SFSH, as well as by other stakeholders (e.g. schools).

## Declarations

### Acknowledgements

Great thanks to the participating vocational schools who readily share their time and experiences with the research team.

### Funding statement

This work was supported by The Danish Health Authority grant number: 1-1010-308/56

### Authors contributions

The authors contributions to different aspects of this work were as follows: Conceiving and designing the study: AVH, TBC, MS, KHR and CDK; Refining the study design and obtaining ethical approval: AVH, CP, TTT, CDK; Writing and revising this manuscript (fully or in part): AVH, TBC, MS, KHR, CP, TTT, CDK.

## Patient and public partnership

The research and intervention project is a collaboration between research and practice: Two Danish public health NGOs (the Danish Heart Foundation and the Danish Cancer Society) are practice partners, whereas Steno Diabetes Center Copenhagen is research partner. The intervention has been cocreated through a participatory process, with an emphasis on including both evidence and practice experience. Further, the practice partners involved in the design and conduct of the study, the choice of outcome measures and recruitment to the study.

## Competing interests

The authors declare that they have no competing interests.

## REFERENCES

1. Boyce, J. C., Mueller, N. B., Hogan-Watts, M. & Luke, D. A. Evaluating the Strength of School Tobacco Policies: The Development of a Practical Rating System. *J. Sch. Health* **79**, 495–504 (2009).
2. Agaku, I. T., Obadan, E. M., Odukoya, O. O. & Olufajo, O. Tobacco-free schools as a core component of youth tobacco prevention programs: a secondary analysis of data from 43 countries. *Eur. J. Public Health* **25**, 210–215 (2015).
3. Aveyard, P., Markham, W. A. & Cheng, K. . A methodological and substantive review of the evidence that schools cause pupils to smoke. *Soc. Sci. Med.* **58**, 2253–2265 (2004).
4. Sæbø, G. & Scheffels, J. Assessing notions of denormalization and renormalization of smoking in light of e-cigarette regulation. *Int. J. Drug Policy* **49**, 58–64 (2017).
5. Schreuders, M., Nuyts, P. A. W., van den Putte, B. & Kunst, A. E. Understanding the impact of school tobacco policies on adolescent smoking behaviour: A realist review. *Soc. Sci. Med.* **183**, 19–27 (2017).
6. Leatherdale, S. T., Brown, K. S., Cameron, R. & McDonald, P. W. Social modeling in the school environment, student characteristics, and smoking susceptibility: A multi-level analysis. *J. Adolesc. Health* **37**, 330–336 (2005).
7. Schreuders, M. *et al.* The association between smoke-free school policies and adolescents' anti-smoking beliefs: Moderation by family smoking norms. *Drug Alcohol Depend.* **204**, 107521 (2019).
8. *Erhvervsuddannelser i Danmark 2019 [Vocational Education and Training in Denmark 2019]*. (Danmarks Statistik [Statistics Denmark], 2019).
9. Klinker, C. D. *et al.* Health Literacy is Associated with Health Behaviors in Students from Vocational Education and Training Schools: A Danish Population-Based Survey. *Int. J. Environ. Res. Public Health* **17**, 671 (2020).

10. Veronica Pisinger *et al.* UNG19 - Sundhed og trivsel på gymnasiale uddannelser 2019 [The Health and Wellbeing survey in Danish general upper secondary education]. (2019).
11. Uddannelsesstatistik [Educational statistics Denmark]. *Uddannelsesstatistik* <https://uddannelsesstatistik.dk/Pages/Reports/1838.aspx>.
12. Frohlich, K. L. & Potvin, L. Transcending the Known in Public Health Practice: The Inequality Paradox: The Population Approach and Vulnerable Populations. *Am. J. Public Health* **98**, 216–221 (2008).
13. Durlak, J. A. & DuPre, E. P. Implementation Matters: A Review of Research on the Influence of Implementation on Program Outcomes and the Factors Affecting Implementation. *Am. J. Community Psychol.* **41**, 327–350 (2008).
14. Murray, E. *et al.* Normalisation process theory: a framework for developing, evaluating and implementing complex interventions. *BMC Med.* **8**, (2010).
15. Galanti, M. R., Coppo, A., Jonsson, E., Bremberg, S. & Faggiano, F. Anti-tobacco policy in schools: upcoming preventive strategy or prevention myth? A review of 31 studies. *Tob. Control* **23**, 295 (2014).
16. Linnansaari, A., Schreuders, M., Kunst, A. E., Rimpelä, A. & Lindfors, P. Understanding school staff members' enforcement of school tobacco policies to achieve tobacco-free school: a realist review. *Syst. Rev.* **8**, (2019).
17. May, C. & Finch, T. Implementing, Embedding, and Integrating Practices: An Outline of Normalization Process Theory. *Sociology* **43**, 535–554 (2009).
18. Lipperman-Kreda, S., Paschall, M. J. & Grube, J. W. Perceived enforcement of school tobacco policy and adolescents' cigarette smoking. *Prev. Med.* **48**, 562–566 (2009).
19. Adams, M. L., Jason, L. A., Pokorny, S. & Hunt, Y. The Relationship Between School Policies and Youth Tobacco Use\*. *J. Sch. Health* **79**, 17–23 (2009).
20. Moore, L. School smoking policies and smoking prevalence among adolescents: multilevel analysis of cross-sectional data from Wales. *Tob. Control* **10**, 117–123 (2001).
21. Jarlstrup, N. S. *et al.* International Approaches to Tobacco Use Cessation Programs and Policy in Adolescents and Young Adults: Denmark. *Curr. Addict. Rep.* **5**, 42–53 (2018).
22. Gordon, J. Ifs, maybes and butts: factors influencing staff enforcement of pupil smoking restrictions. *Health Educ. Res.* **18**, 329–340 (2003).
23. Turner, K. M. Butt in, butt out: pupils' views on the extent to which staff could and should enforce smoking restrictions. *Health Educ. Res.* **19**, 40–50 (2004).
24. Schreuders, M., Linnansaari, A., Lindfors, P., van den Putte, B. & Kunst, A. E. Why staff at European schools abstain from enforcing smoke-free policies on persistent violators. *Health Promot. Int.* (2019) doi:10.1093/heapro/daz111.



1  
2  
3  
4  
5  
6  
7  
8  
9  
10  
11  
12  
13  
14  
15  
16  
17  
18  
19  
20  
21  
22  
23  
24  
25  
26  
27  
28  
29  
30  
31  
32  
33  
34  
35  
36  
37  
38  
39  
40  
41  
42  
43  
44  
45  
46  
47  
48  
49  
50  
51  
52  
53  
54  
55  
56  
57  
58  
59  
60

25. SILNE-R. *SILNE-R. Enhancing the effectiveness of programs and strategies to prevent smoking by adolescents: a realist evaluation comparing seven European countries* <http://silne-r.ensp.network/about-silne/objectives/>.
26. SILNE-R consortium, Schreuders, M., van den Putte, B. & Kunst, A. E. Why Secondary Schools Do Not Implement Far-Reaching Smoke-Free Policies: Exploring Deep Core, Policy Core, and Secondary Beliefs of School Staff in the Netherlands. *Int. J. Behav. Med.* **26**, 608–618 (2019).
27. Heinze, C., Hjort, A. V., Elsborg, P., Maindal, H. T. & Klinker, C. D. Smoke-free-school-hours at vocational education and training schools in Denmark: attitudes among managers and teaching staff – a national cross-sectional study. *BMC Public Health* **19**, (2019).
28. Kathrine Højlund Rasmussen, Anneke Vang Hansen, Charlotte Demant Klinker, & Steffen Löfvall, Clara Heinze. *Udbredelse af røgfri skoletid på erhvervsskoler: en forundersøgelse til en effektiv tobaksforebyggelsesindsats på erhvervsskoler*. (Hjerteforeningen : Steno Diabetes Center, 2018).
29. Bast, L. S. *et al.* High impact of implementation on school-based smoking prevention: the X:IT study—a cluster-randomized smoking prevention trial. *Implement. Sci.* **11**, (2015).
30. Pawson, R. & Tilley, N. *Realistic evaluation*. (Sage, 1997).
31. Dalkin, S. M., Greenhalgh, J., Jones, D., Cunningham, B. & Lhussier, M. What’s in a mechanism? Development of a key concept in realist evaluation. *Implement. Sci.* **10**, (2015).
32. Moore, G. F. *et al.* From complex social interventions to interventions in complex social systems: Future directions and unresolved questions for intervention development and evaluation. *Evaluation* **25**, 23–45 (2019).
33. Hawe, P., Shiell, A. & Riley, T. Theorising Interventions as Events in Systems. *Am. J. Community Psychol.* **43**, 267–276 (2009).
34. Keshavarz, N., Nutbeam, D., Rowling, L. & Khavarpour, F. Schools as social complex adaptive systems: A new way to understand the challenges of introducing the health promoting schools concept. *Soc. Sci. Med.* **70**, 1467–1474 (2010).
35. Moore, G. F. *et al.* Process evaluation of complex interventions: Medical Research Council guidance. *BMJ* **350**, h1258–h1258 (2015).
36. Craig, P. *et al.* Developing and evaluating complex interventions: the new Medical Research Council guidance. *BMJ* a1655 (2008) doi:10.1136/bmj.a1655.
37. Wong, G. *et al.* Quality and reporting standards, resources, training materials and information for realist evaluation: the RAMESES II project. *Health Serv. Deliv. Res.* **5**, 1–108 (2017).
38. Gilmore, B., McAuliffe, E., Power, J. & Vallières, F. Data Analysis and Synthesis Within a Realist Evaluation: Toward More Transparent Methodological Approaches. *Int. J. Qual. Methods* **18**, 160940691985975 (2019).

- 1  
2  
3  
4 39. Marchal, B., van Belle, S., van Olmen, J., Hoérée, T. & Kegels, G. Is realist evaluation keeping  
5 its promise? A review of published empirical studies in the field of health systems research. *Evaluation* **18**,  
6 192–212 (2012).  
7  
8  
9 40. Glynn Sharpe. A Review of Program Theory and Theory-Based Evaluations. *Am. Int. J.*  
10 *Contemp. Res.* (2011).  
11  
12 41. Ray Pawson & Sanjeev Sridharan. Chapter 4: Theory-driven evaluation of public health  
13 programmes. in *Evidence-based Public Health: Effectiveness and efficiency* vol. 2009 (Oxford University  
14 Press).  
15  
16  
17 42. Marchal, B., Giralt, A. N., Sulaberidze, L., Chikovani, I. & Abejirinde, I.-O. O. Designing and  
18 evaluating provider results-based financing for tuberculosis care in Georgia: a realist evaluation protocol.  
19 *BMJ Open* **9**, e030257 (2019).  
20  
21  
22 43. Evans, R., Scourfield, J. & Murphy, S. Pragmatic, formative process evaluations of complex  
23 interventions and why we need more of them. *J. Epidemiol. Community Health* **69**, 925–926 (2015).  
24  
25  
26 44. Kellogg Foundation 2004. Using Logic Models to Bring Together Planning, Evaluation, and  
27 Action. Logic Model Development Guide.  
28  
29 45. Rod, M. H., Ingholt, L., Bang Sørensen, B. & Tjørnhøj-Thomsen, T. The spirit of the  
30 intervention: reflections on social effectiveness in public health intervention research. *Crit. Public Health*  
31 **24**, 296–307 (2014).  
32  
33  
34 46. Weiner, B. J. A theory of organizational readiness for change. *Implement. Sci.* **4**, (2009).  
35  
36 47. McLeroy, K. R., Bibeau, D., Steckler, A. & Glanz, K. An ecological perspective on health  
37 promotion programs. *Health Educ. Q.* **15**, 351–377 (1988).  
38  
39 48. Ingholt, L. *et al.* How can we strengthen students' social relations in order to reduce school  
40 dropout? An intervention development study within four Danish vocational schools. *BMC Public Health* **15**,  
41 (2015).  
42  
43  
44 49. Rogers, P. J. Using Programme Theory to Evaluate Complicated and Complex Aspects of  
45 Interventions. *Evaluation* **14**, 29–48 (2008).  
46  
47 50. Graham Moore<sup>1,2</sup> *et al.* *Process evaluation of complex interventions. UK Medical Research*  
48 *Council (MRC) guidance. Full text.* ([https://mrc.ukri.org/documents/pdf/mrc-phsrn-process-evaluation-](https://mrc.ukri.org/documents/pdf/mrc-phsrn-process-evaluation-guidance-final/)  
49 [guidance-final/](https://mrc.ukri.org/documents/pdf/mrc-phsrn-process-evaluation-guidance-final/)).  
50  
51  
52 51. Wong, G., Greenhalgh, T., Westhorp, G., Buckingham, J. & Pawson, R. RAMESES publication  
53 standards: realist syntheses. *BMC Med.* **11**, (2013).  
54  
55 52. Hawkins, A. J. Realist evaluation and randomised controlled trials for testing program theory  
56 in complex social systems. *Evaluation* **22**, 270–285 (2016).  
57  
58  
59  
60

1  
2  
3  
4  
5  
6  
7  
8  
9  
10  
11  
12  
13  
14  
15  
16  
17  
18  
19  
20  
21  
22  
23  
24  
25  
26  
27  
28  
29  
30  
31  
32  
33  
34  
35  
36  
37  
38  
39  
40  
41  
42  
43  
44  
45  
46  
47  
48  
49  
50  
51  
52  
53  
54  
55  
56  
57  
58  
59  
60

53. Suter, W. *Introduction to Educational Research: A Critical Thinking Approach*. (SAGE Publications, Inc., 2012). doi:10.4135/9781483384443.
54. Kremers, S. P. J., Mudde, A. N. & de Vries, H. Development and Longitudinal Test of an Instrument to Measure Behavioral Stages of Smoking Initiation. *Subst. Use Misuse* **39**, 225–252 (2004).
55. Prochaska, J. O. & Velicer, W. F. The Transtheoretical Model of Health Behavior Change. *Am. J. Health Promot.* **12**, 38–48 (1997).
56. Chung, A. & Rimal, R. N. Social norms: A review. *Rev. Commun. Res.* **4**, 1–28 (2016).
57. Eisenberg, M. E. & Forster, J. L. Adolescent smoking behavior: measures of social norms. *Am. J. Prev. Med.* **25**, 122–128 (2003).
58. Lozano, P. A. (2016). *Smoking-Related Stigma: A Public Health Tool Or A Damaging Force ?*. (Doctoral dissertation). Retrieved from <https://scholarcommons.sc.edu/etd/3488>.
59. Dohnke, B., Weiss-Gerlach, E. & Spies, C. D. Social influences on the motivation to quit smoking: Main and moderating effects of social norms. *Addict. Behav.* **36**, 286–293 (2011).
60. Katherine East. *The Development of Tools to Measure Norms Towards Smoking, Nicotine Use, and the Tobacco Industry*. 2017.
61. Brown-Johnson, C. G. *et al.* Validity and reliability of the internalized stigma of smoking inventory: An exploration of shame, isolation, and discrimination in smokers with mental health diagnoses: Smoking Stigma Scale. *Am. J. Addict.* **24**, 410–418 (2015).
62. Conner, M., Conner, M., Sandberg, T., McMillan, B. & Higgins, A. Role of anticipated regret, intentions and intention stability in adolescent smoking initiation. *Br. J. Health Psychol.* **11**, 85–101 (2006).
63. Romppel, M. *et al.* A short form of the General Self-Efficacy Scale (GSE-6): Development, psychometric properties and validity in an intercultural non-clinical sample and a sample of patients at risk for heart failure. *GMS Psycho-Soc.-Med.* **10Doc01 ISSN 1860-5214** (2013) doi:10.3205/psm000091.
64. Sterling, K. L., Ford, K. H., Park, H. & McAlister, A. L. Scales of Smoking-Related Self-Efficacy, Beliefs, and Intention: Assessing Measurement Invariance among Intermittent and Daily High School Smokers. *Am. J. Health Promot.* **28**, 310–315 (2014).
65. Hans Henrik Knoop, Aarhus Universitet, Bjørn E. Holstein, Syddansk Universitet, Hanne Viskum, Professionshøjskolen Metropol & Jannie Moon Lindskov, DCUM. *Elevernes fællesskab og trivsel i skolen. Analyser af Den Nationale Trivselsmåling [Pupils communities and well-being in primary school. Analysis based on the national well-being survey]*. <https://dcum.dk/media/2107/dcum-rapport-elevernes-trivsellow.pdf> (2017).
66. Tennant, R. *et al.* The Warwick-Edinburgh Mental Well-being Scale (WEMWBS): development and UK validation. *Health Qual. Life Outcomes* **5**, 63 (2007).

- 1  
2  
3  
4 67. Thomas, S. D., Hathaway, D. K. & Arheart, K. L. Face Validity. *West. J. Nurs. Res.* **14**, 109–112  
5 (1992).  
6  
7  
8 68. Lene Winther Ringgaard, Clara Heinze, Nicklas Bunck Sørensen Andersen, Gro Inge Lemcke  
9 Hansen, Anneke Vang Hjort, Charlotte Demant Klinker. *UNG19 - Sundhed og trivsel på erhvervsuddannelser*  
10 *2019 [The Health and Wellbeing survey in Danish vocational education and training]*. (2020).  
11  
12 69. Rapley, T. *et al.* Improving the normalization of complex interventions: part 1 - development  
13 of the NoMAD instrument for assessing implementation work based on normalization process theory (NPT).  
14 *BMC Med. Res. Methodol.* **18**, (2018).  
15  
16  
17 70. Finch, T. L. *et al.* Improving the normalization of complex interventions: part 2 - validation of  
18 the NoMAD instrument for assessing implementation work based on normalization process theory (NPT).  
19 *BMC Med. Res. Methodol.* **18**, (2018).  
20  
21  
22 71. Rozema, A. D., Mathijssen, J. J. P., van Oers, H. A. M. & Jansen, M. W. J. Evaluation of the  
23 Process of Implementing an Outdoor School Ground Smoking Ban at Secondary Schools. *J. Sch. Health* **88**,  
24 859–867 (2018).  
25  
26  
27 72. Saluja, K. *et al.* School environment assessment tools to address behavioural risk factors of  
28 non-communicable diseases: A scoping review. *Prev. Med. Rep.* **10**, 1–8 (2018).  
29  
30  
31 73. Mukumbang, F. C., Marchal, B., Van Belle, S. & van Wyk, B. Using the realist interview  
32 approach to maintain theoretical awareness in realist studies. *Qual. Res.* 146879411988198 (2019)  
33 doi:10.1177/1468794119881985.  
34  
35 74. Floyd, F. J. & Widaman, K. F. Factor analysis in the development and refinement of clinical  
36 assessment instruments. *Psychol. Assess.* **7**, 286–299 (1995).  
37  
38 75. Kirkwood, B. R., Sterne, J. A. C. & Kirkwood, B. R. *Essential medical statistics*. (Blackwell  
39 Science, 2003).  
40  
41  
42 76. Ford, J. A. *et al.* Access to primary care for socio-economically disadvantaged older people in  
43 rural areas: exploring realist theory using structural equation modelling in a linked dataset. *BMC Med. Res.*  
44 *Methodol.* **18**, (2018).  
45  
46  
47 77. Ravn, R. Testing mechanisms in large-N realistic evaluations. *Evaluation* **25**, 171–188 (2019).  
48  
49  
50 78. Jagosh, J. Retroductive theorizing in Pawson and Tilley's applied scientific realism. *J. Crit.*  
51 *Realism* **19**, 121–130 (2020).  
52  
53  
54 79. Meyer, S. B. & Lunnay, B. The Application of Abductive and Retroductive Inference for the  
55 Design and Analysis of Theory-Driven Sociological Research. *Sociol. Res. Online* **18**, 86–96 (2013).  
56  
57  
58 80. Bonell, C., Jamal, F., Melendez-Torres, G. J. & Cummins, S. 'Dark logic': theorising the harmful  
59 consequences of public health interventions. *J. Epidemiol. Community Health* **69**, 95–98 (2015).  
60

1  
2  
3  
4  
5  
6  
7  
8  
9  
10  
11  
12  
13  
14  
15  
16  
17  
18  
19  
20  
21  
22  
23  
24  
25  
26  
27  
28  
29  
30  
31  
32  
33  
34  
35  
36  
37  
38  
39  
40  
41  
42  
43  
44  
45  
46  
47  
48  
49  
50  
51  
52  
53  
54  
55  
56  
57  
58  
59  
60

## Figure Legends

**Figure 1** Realist research cycle of the Smoke-Free Vocational Schools intervention project.

**Figure 2** Graphic representation of the initial programme theory of the Smoke-Free Vocational Schools intervention. SFSH: Smoke-free school hours. The intervention activities delivered by practice partners are shown in purple. The activities or processes managed by schools but facilitated by practice partners are shown in green.

**Figure 3** Process evaluation of the Smoke-Free Vocational Schools intervention, based on the Medical Research Councils guidelines for process evaluation of complex interventions.

**Figure 4** Timeline and outcomes evaluation for the Smoke-Free Vocational Schools intervention.

**Figure 1** Realist research cycle of the Smoke-Free Vocational Schools intervention project.

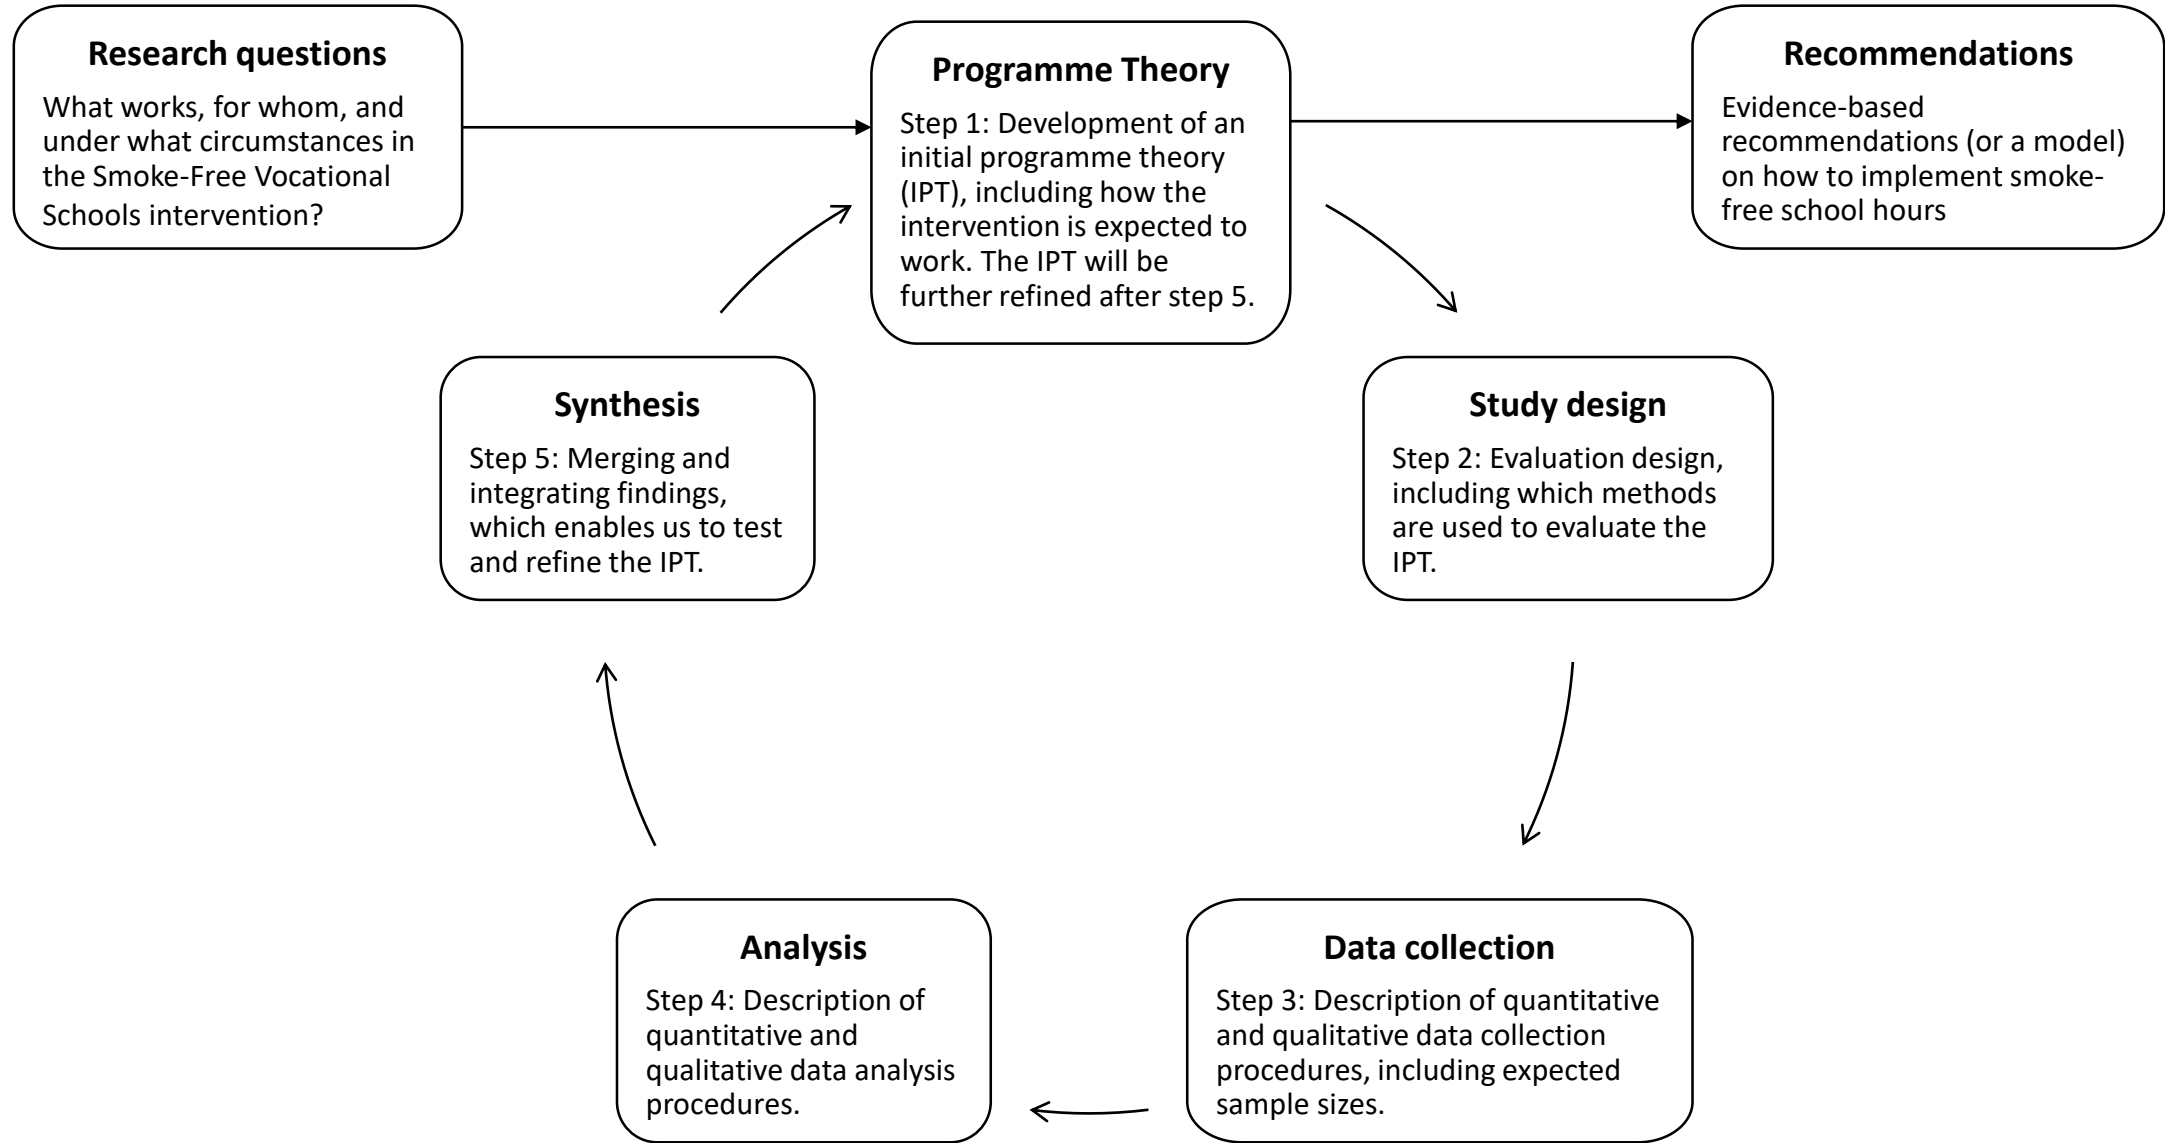

1  
2  
3  
4  
5  
6  
7  
8  
9  
10  
11  
12  
13  
14  
15  
16  
17  
18  
19  
20  
21  
22  
23  
24  
25  
26  
27  
28  
29  
30  
31  
32  
33  
34  
35  
36  
37  
38  
39  
40  
41

Figure 2 of 29  
 BMJ Open  
 Graphic representation of the initial programme theory of the Smoke-Free Vocational Schools intervention. SFSH: Smoke-free school hours. The intervention activities delivered by practice partners are shown in purple. The activities or processes managed by schools but facilitated by practice partners are shown in green.

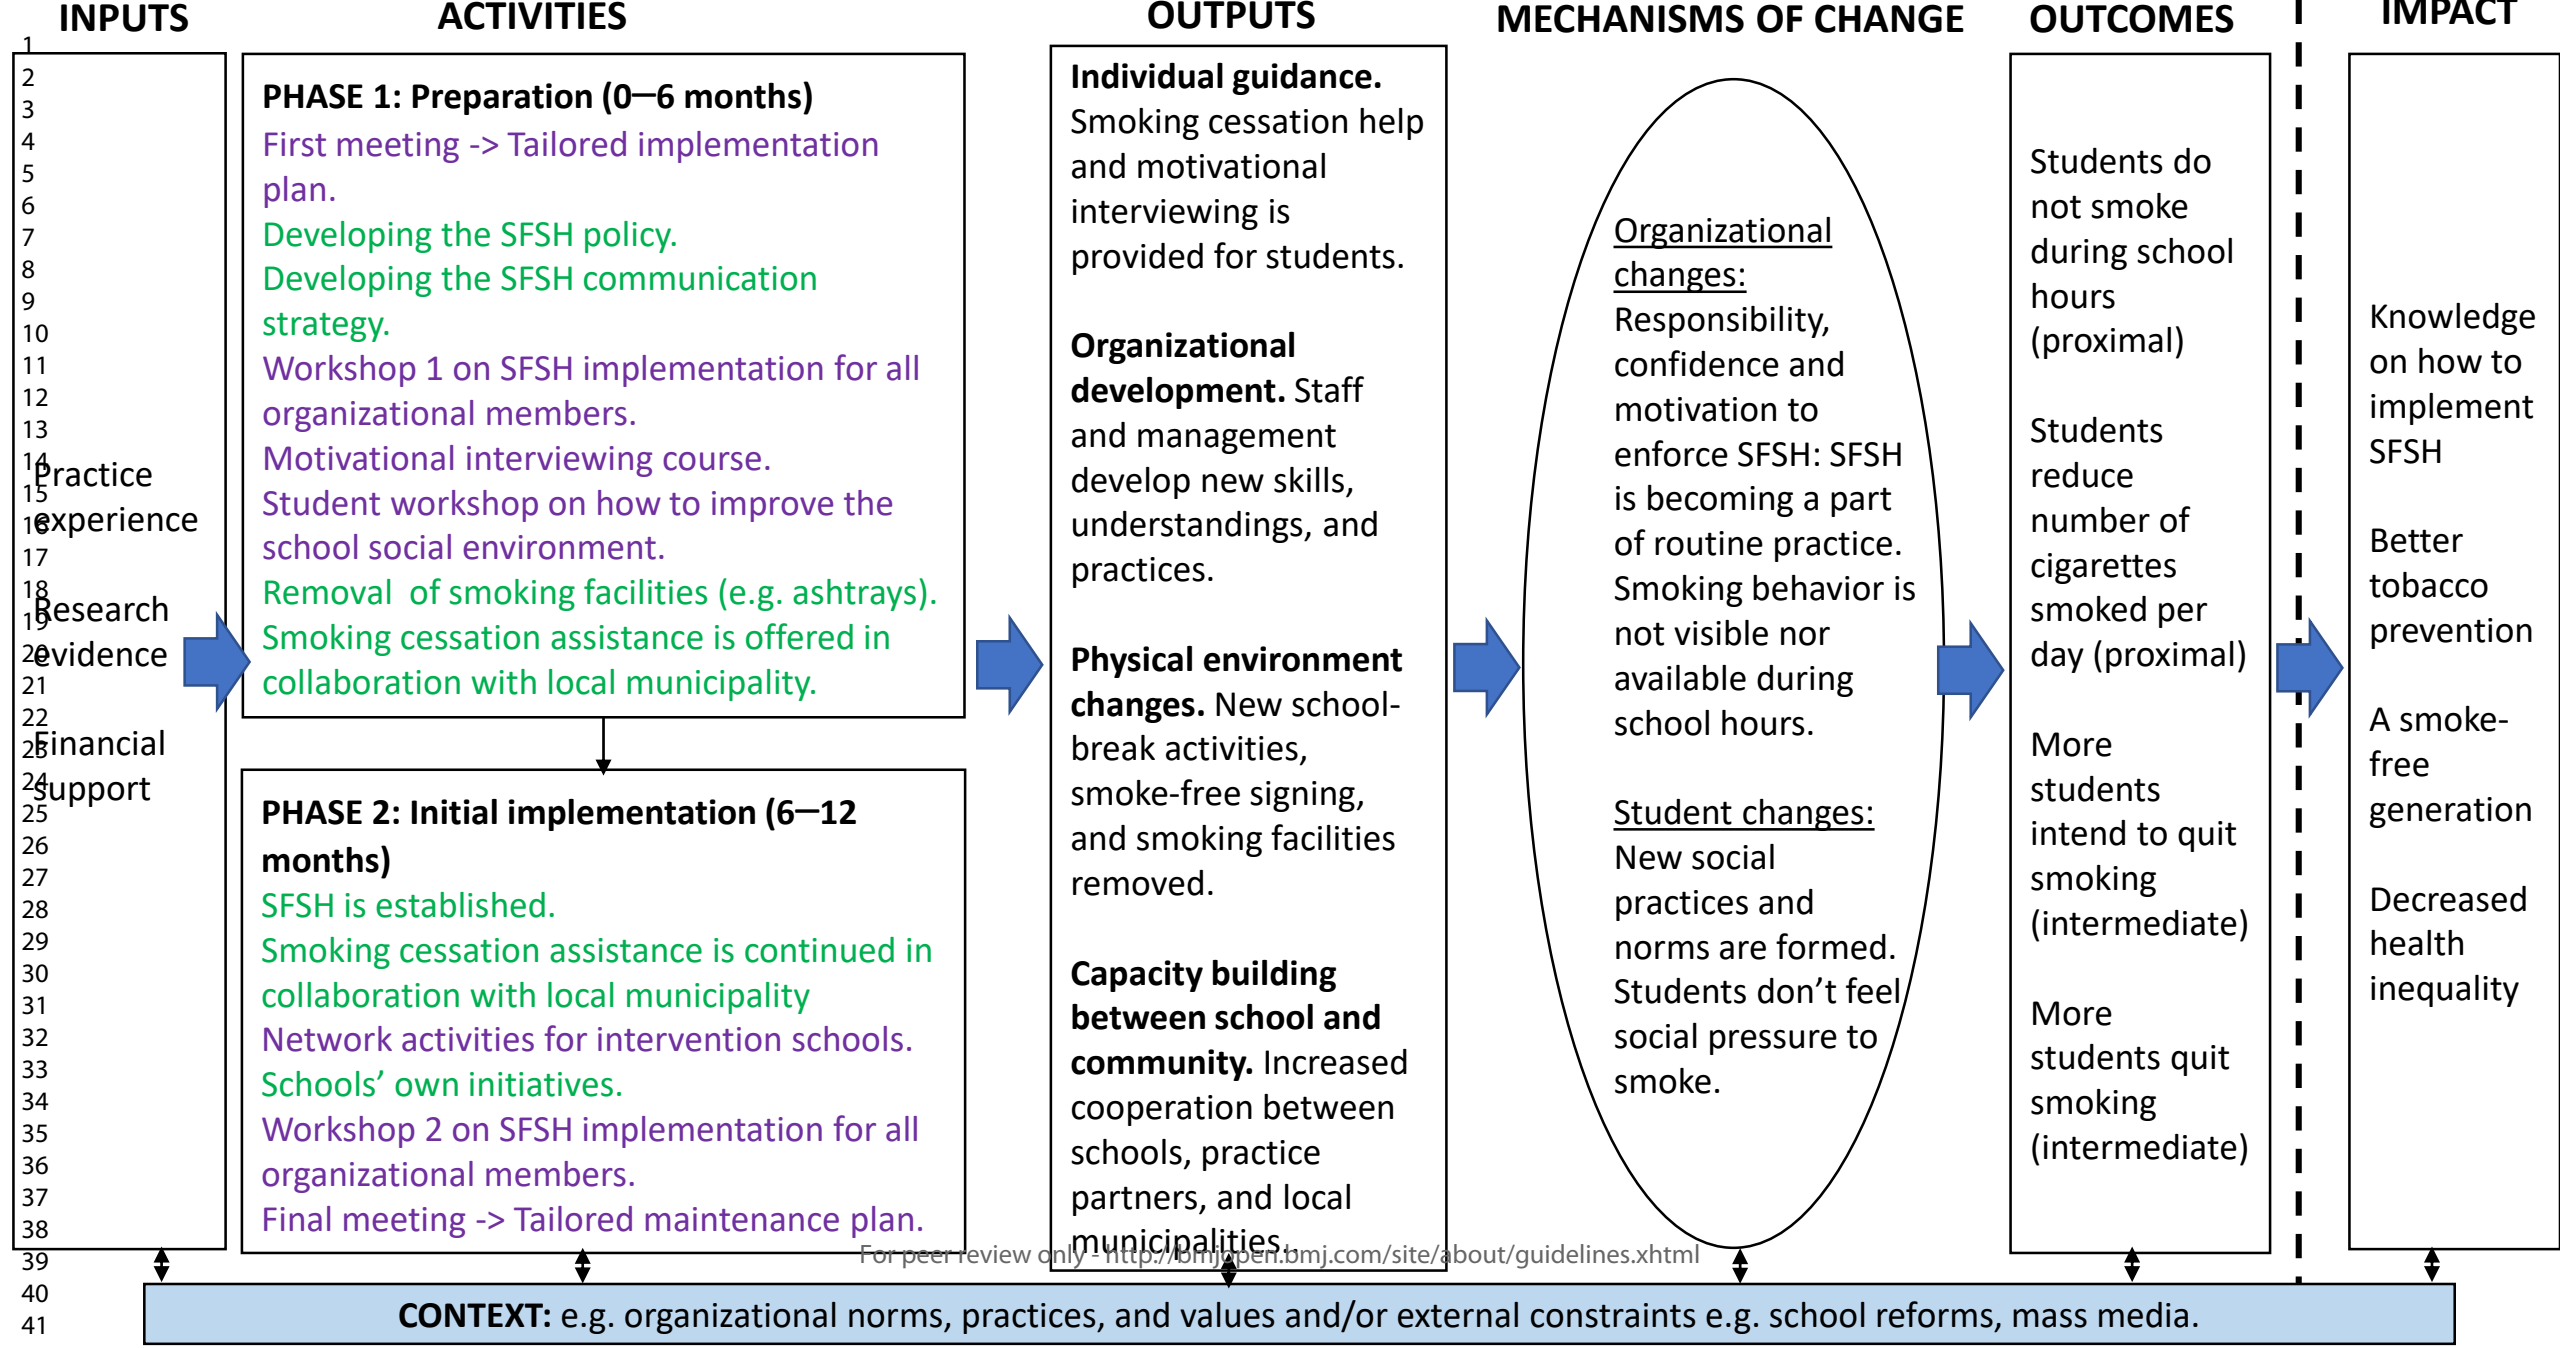

**Figure 3** Process evaluation of the Smoke-Free Vocational Schools intervention, based on the Medical Research Councils guidelines for process evaluation of complex interventions.

1  
2  
3  
4  
5  
6  
7  
8  
9  
10  
11  
12  
13  
14  
15  
16  
17  
18  
19  
20  
21  
22  
23  
24  
25  
26  
27  
28  
29  
30  
31  
32  
33  
34  
35  
36  
37  
38  
39  
40  
41

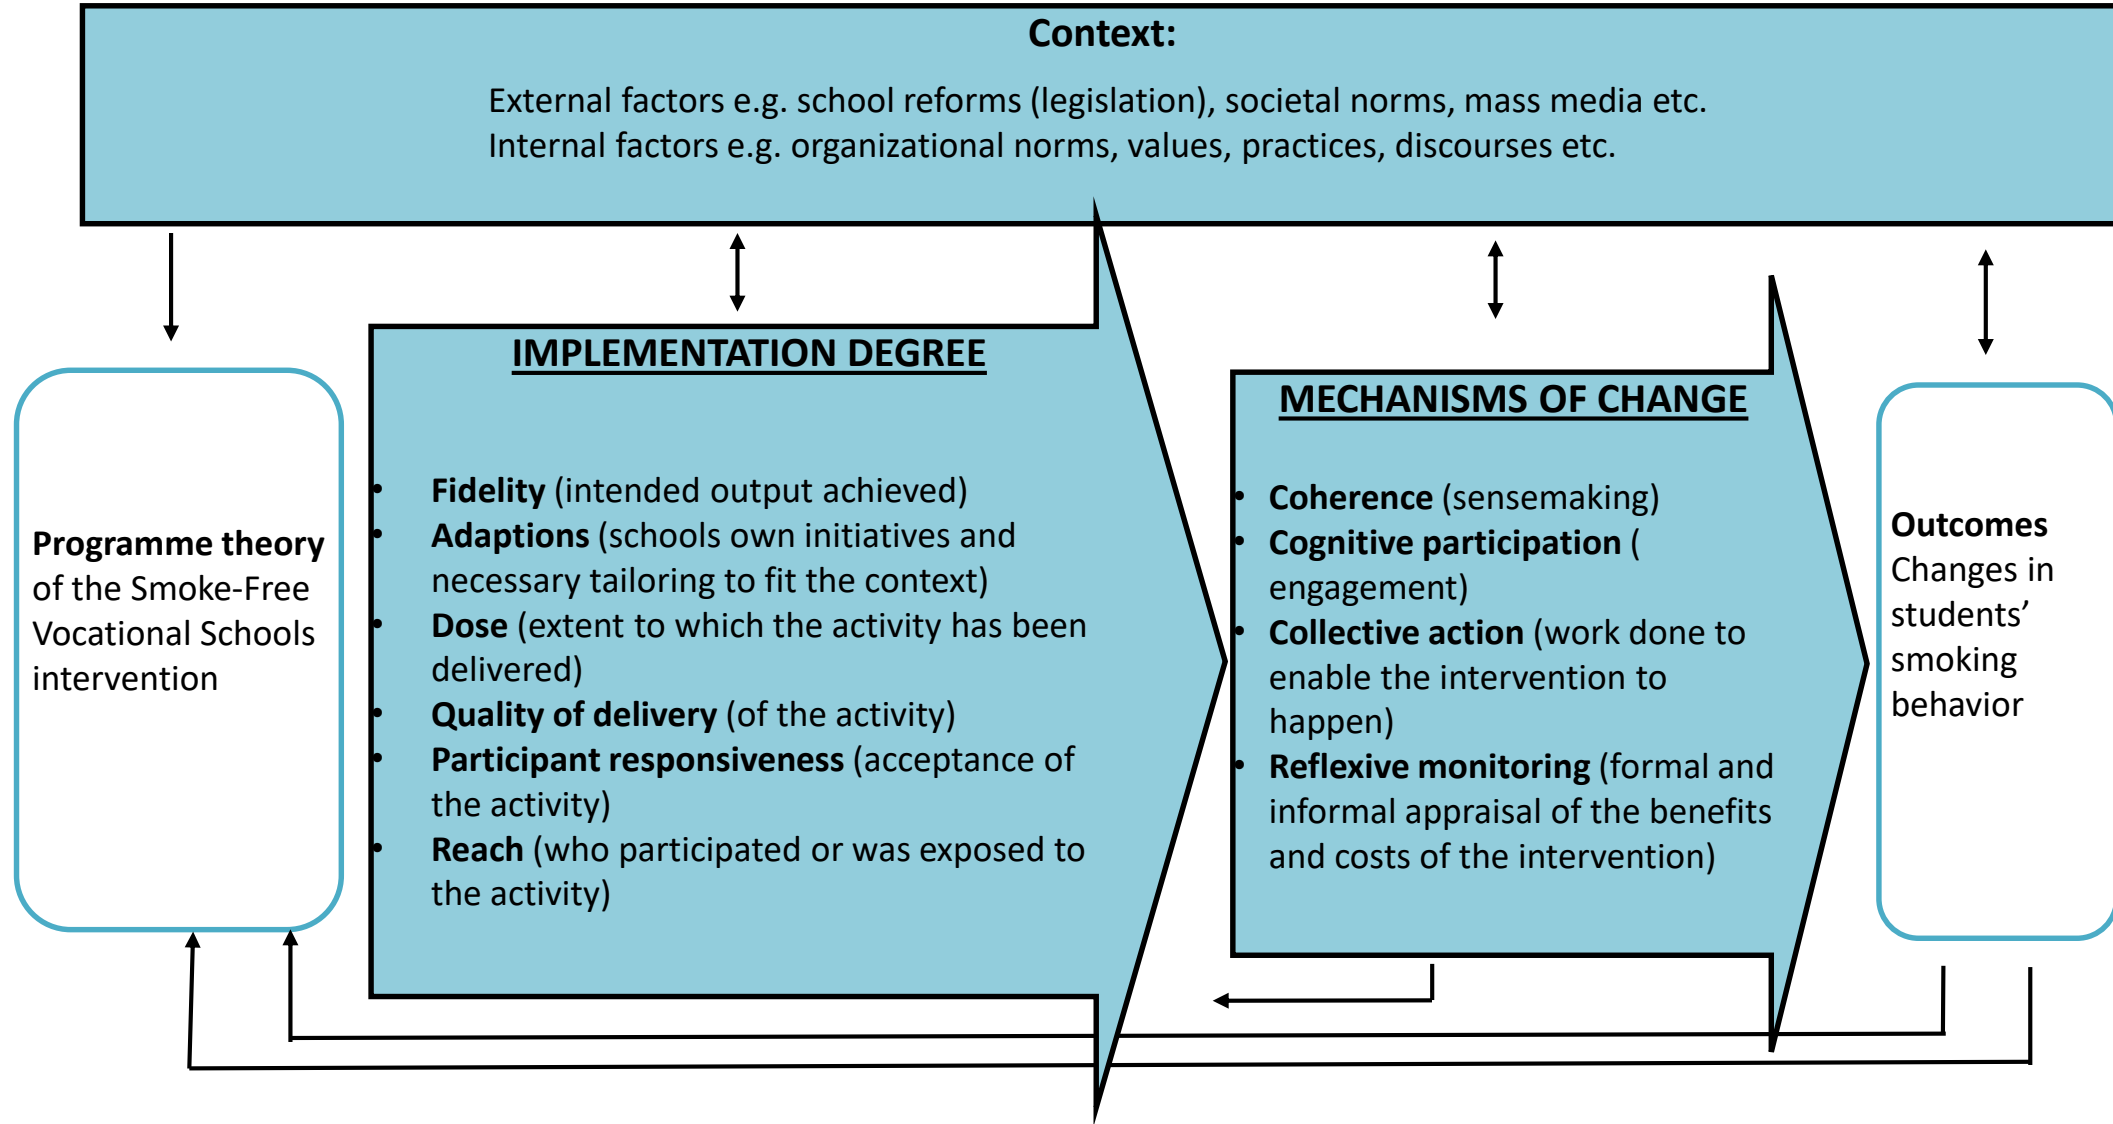



**Figure 4** Timeline and outcomes evaluation for the Smoke-Free Vocational Schools intervention.

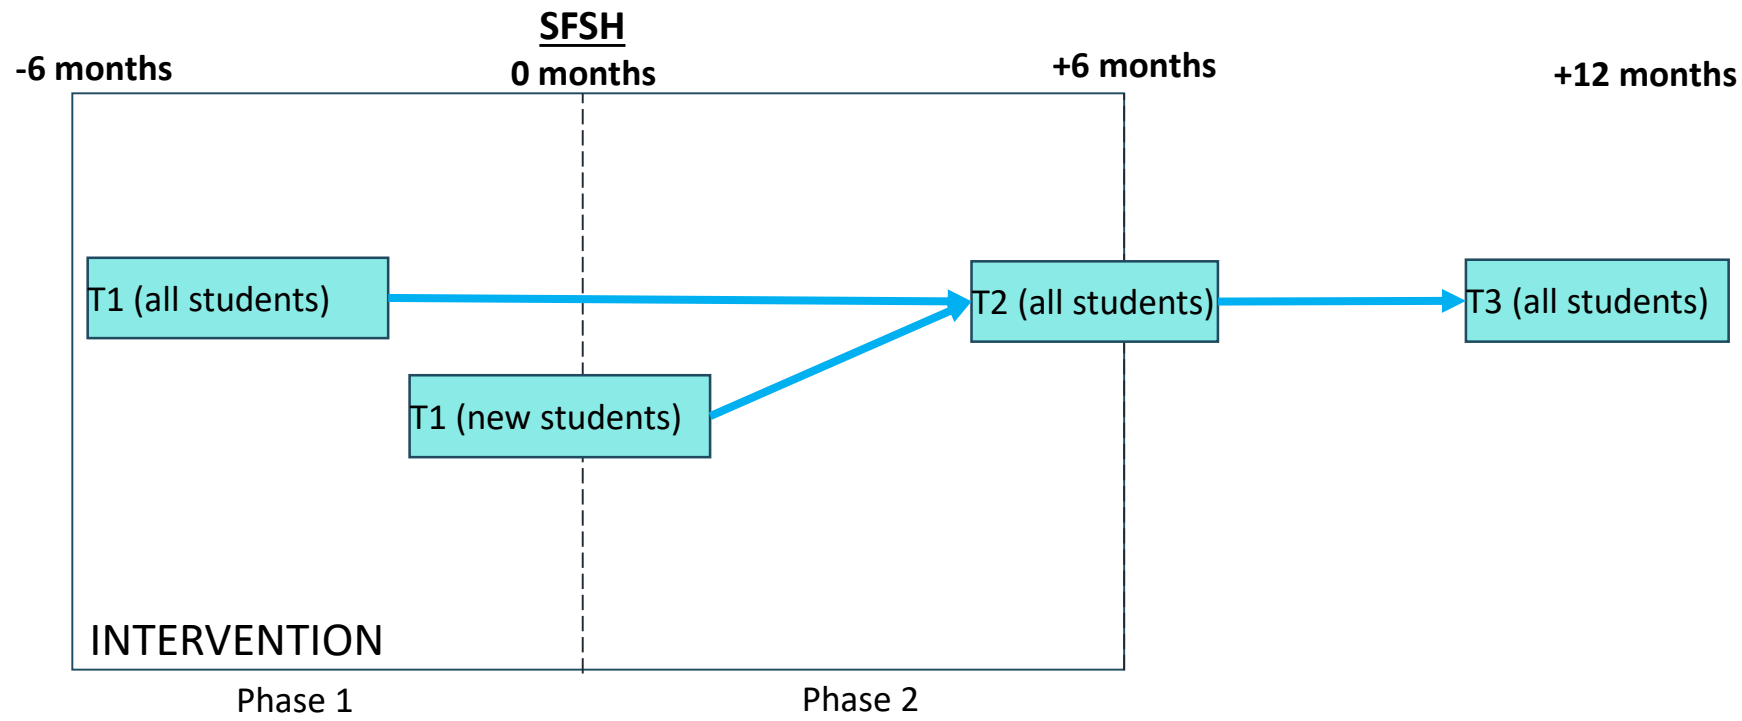

**Supplementary File 1: Operationalization of data collection in the process evaluation (implementation degree and mechanisms of change) and the outcomes evaluation**

|                              | Concept                    | Operationalization                                                                                                                                                         | Data collection                                                                                         |
|------------------------------|----------------------------|----------------------------------------------------------------------------------------------------------------------------------------------------------------------------|---------------------------------------------------------------------------------------------------------|
| <b>Implementation degree</b> |                            |                                                                                                                                                                            |                                                                                                         |
| Organizational development   | Fidelity                   | If the workshops and course has resulted in a shared smoke-free school hours understanding and new skills to support students dealing with not smoking during school hours | Staff survey 1; Staff survey 2                                                                          |
|                              | Adaptions                  | Context-specific adjustments and initiatives                                                                                                                               | Project coordinator survey 2; Facilitator questionnaire (NGOs)                                          |
|                              | Dose                       | Extent to which new learnings from workshops and skills from course are being used at school                                                                               | Staff survey 1; Staff survey 2                                                                          |
|                              | Quality of delivery        | Organization of new learnings and skills at school                                                                                                                         | Staff survey 1; Staff survey 2                                                                          |
|                              | Participant responsiveness | Attitudes towards workshops and course                                                                                                                                     | Staff survey 1; Staff survey 2                                                                          |
|                              | Reach                      | For whom is the component implemented (sub-group analysis)                                                                                                                 | Staff survey 1; Staff survey 2                                                                          |
| Physical environment changes | Fidelity                   | If new school-break activities and smoke-free-signing has been established, and smoking facilities removed                                                                 | Project coordinator survey 2                                                                            |
|                              | Adaptions                  | Context-specific adjustments and initiatives                                                                                                                               | Project coordinator survey 2; structured observations on school grounds; Project coordinator interviews |
|                              | Dose                       | Extent to which school-break activities and smoke-free signing is known to students                                                                                        | Student survey 2                                                                                        |
|                              | Quality of delivery        | Extent to which new school-break activities are being used by students and smoke-free signing has a prominent position                                                     | Student survey 2; structured observations on school grounds                                             |
|                              | Participant responsiveness | Attitudes towards workshops new school-break activities and smoke-free-signing                                                                                             | Student survey 2                                                                                        |
|                              | Reach                      | For whom is the component implemented (sub-group analysis)                                                                                                                 | Student survey 2                                                                                        |
| Individual guidance          | Fidelity                   | If the school offers smoking cessation help or other help for students to cope with smoke-free school hours                                                                | Project coordinator survey 2                                                                            |
|                              | Adaptions                  | Context-specific adjustments and initiatives                                                                                                                               | Project coordinator survey 1; Project coordinator survey 2; Project coordinator interview               |
|                              | Dose                       | Number of smoking cessation courses delivered and number of students attending the courses                                                                                 | Project coordinator survey 1; Project coordinator survey 2                                              |
|                              | Quality of delivery        | Extent to which students know which support to cope with smoke-free school hours is provided                                                                               | Student survey 2                                                                                        |
|                              | Participant responsiveness | Attitudes towards help to cope with smoke-free school hours and attitudes towards attending smoking cessation courses                                                      | Student survey 2                                                                                        |

1  
2  
3  
4  
5  
6  
7  
8  
9  
10  
11  
12  
13  
14  
15  
16  
17  
18  
19  
20  
21  
22  
23  
24  
25  
26  
27  
28  
29  
30  
31  
32  
33  
34  
35  
36  
37  
38  
39  
40  
41  
42  
43  
44  
45  
46  
47  
48  
49  
50  
51  
52  
53  
54  
55  
56  
57  
58  
59  
60

|                                                                                                                                                                              | Reach                      | For whom is the component implemented (sub-group analysis)                                                                                                                                                                                                                                                                                                                                                 | Student survey 2                                                                                          |
|------------------------------------------------------------------------------------------------------------------------------------------------------------------------------|----------------------------|------------------------------------------------------------------------------------------------------------------------------------------------------------------------------------------------------------------------------------------------------------------------------------------------------------------------------------------------------------------------------------------------------------|-----------------------------------------------------------------------------------------------------------|
| Capacity building between the school and community                                                                                                                           | Fidelity                   | If the relationship between school and NGOs, and school and municipality has been strengthened                                                                                                                                                                                                                                                                                                             | Project coordinator survey 2                                                                              |
|                                                                                                                                                                              | Adaptions                  | Context-specific adjustments and initiatives                                                                                                                                                                                                                                                                                                                                                               | Project coordinator survey 2; Project coordinator interview                                               |
|                                                                                                                                                                              | Dose                       | Extent to which the school has discussed smoke-free school hours implementation with NGOs and local municipality                                                                                                                                                                                                                                                                                           | Project coordinator survey 2                                                                              |
|                                                                                                                                                                              | Quality of delivery        | Extent to which the schools has experienced support from the NGOs and local municipality                                                                                                                                                                                                                                                                                                                   | Project coordinator survey 2                                                                              |
|                                                                                                                                                                              | Participant responsiveness | Attitudes towards integrating external resources in smoke-free school hours implementation                                                                                                                                                                                                                                                                                                                 | Staff survey 2                                                                                            |
|                                                                                                                                                                              | Reach                      | For whom is the component implemented (sub-group analysis)                                                                                                                                                                                                                                                                                                                                                 | Facilitator questionnaire (NGOs)                                                                          |
| Smoke-free school hours implementation                                                                                                                                       | Fidelity                   | If smoking is allowed during school hours and extent to which students experience smoking during school-hours                                                                                                                                                                                                                                                                                              | Staff survey 2; Staff survey 3; Student survey 2                                                          |
|                                                                                                                                                                              | Adaptions                  | Context-specific adjustments in sanctioning and enforcement procedures and practice                                                                                                                                                                                                                                                                                                                        | Staff survey 2; Staff survey 3; Project coordinator interview                                             |
|                                                                                                                                                                              | Dose                       | Extent to which students know the policy and extent of smoking visibility                                                                                                                                                                                                                                                                                                                                  | Student survey 2, Staff survey 2; Staff survey 3; Structured observations on school grounds               |
|                                                                                                                                                                              | Quality of delivery        | Frequency and manner/method of enforcement                                                                                                                                                                                                                                                                                                                                                                 | Staff survey 2; Staff survey 3                                                                            |
|                                                                                                                                                                              | Participant responsiveness | Attitudes towards the policy and whether staff experience the policy as a normal part of their work                                                                                                                                                                                                                                                                                                        | Student survey 2; Staff survey 2; Staff survey 3                                                          |
|                                                                                                                                                                              | Reach                      | For whom is the component implemented (sub-group analysis)                                                                                                                                                                                                                                                                                                                                                 | Student survey 2; Staff survey 2; Staff survey 3                                                          |
| <b>Mechanisms of change</b>                                                                                                                                                  |                            |                                                                                                                                                                                                                                                                                                                                                                                                            |                                                                                                           |
| Interactions between the intervention and context-mechanisms i.e. reasoning and behavior among participants, constrained by e.g. organizational norms, values and discourses | Coherence                  | If and why smoke-free school hours makes sense given the situation the school currently face. Extant to which there's a shared understanding about the policy and the organizational members see the potential value of smoke-free school hours.                                                                                                                                                           | Management interview; Project coordinator interview; Teacher focus groups; Staff survey 2; Staff survey 3 |
|                                                                                                                                                                              | Cognitive participation    | If and how there's been established a community of practice around smoke-free school hours, if there's key people driving the implementation forward or the contrary and who. If it is seen as a legitimate part of the schoolwork and if there's been established new practices. Extent to which the organizational members are open to change their daily routines to work with smoke-free school hours. |                                                                                                           |
|                                                                                                                                                                              | Collective action          | If and how smoke-free school hours in enacted as part of routine practice including management practices e.g. how is the work organized and which resources are in place to support the implementation. To what extent the work can be integrated into the everyday school practices and whether people involved has sufficient skills and confidence in work with smoke-free school hours.                |                                                                                                           |
|                                                                                                                                                                              | Reflexive monitoring       | If and how smoke-free school hours affect the everyday school life. Formel and informal appraisal procedures and reconfiguration.                                                                                                                                                                                                                                                                          |                                                                                                           |

1  
2  
3  
4  
5  
6  
7  
8  
9  
10  
11  
12  
13  
14  
15  
16  
17  
18  
19  
20  
21  
22  
23  
24  
25  
26  
27  
28  
29  
30  
31  
32  
33  
34  
35  
36  
37  
38  
39  
40  
41  
42  
43  
44  
45  
46  
47  
48  
49  
50  
51  
52  
53  
54  
55  
56  
57  
58  
59  
60

| <b>Sub-study 3: Outcomes</b> |                            |                                                                        |                  |
|------------------------------|----------------------------|------------------------------------------------------------------------|------------------|
| Baseline                     | Primary outcome measure    | Smoking during school hours (Y/N)                                      | Student survey 1 |
|                              | Secondary outcome measures | Number of cigarettes smoked per day, Intention to quit, Smoking status |                  |
|                              | Covariates                 | Age, gender, SES etc.                                                  |                  |
| Follow-up 1                  | Primary outcome measure    | Smoking during school hours (Y/N)                                      | Student survey 2 |
|                              | Secondary outcome measures | Number of cigarettes smoked per day, Intention to quit, Smoking status |                  |
|                              | Covariates                 | Age, gender, SES etc.                                                  |                  |
| Follow-up 2                  | Primary outcome measure    | Smoking during school hours (Y/N)                                      | Student survey 3 |
|                              | Secondary outcome measures | Number of cigarettes smoked per day, Intention to quit, Smoking status |                  |
|                              | Covariates                 | Age, gender, SES etc.                                                  |                  |

For peer review only
