# Supplementary material for: Programme theory and realist evaluation of the ‘Smoke-Free Vocational Schools’ research and intervention project: a study protocol
Source: PubMed Central journal article supplement — BMJ Open. 2021 Feb 4;11(2):e042728. doi: 10.1136/bmjopen-2020-042728 (PMC7925872; doi:10.1136/bmjopen-2020-042728), 2021-02-04
Supplement: bmjopen-2020-042728supp001.pdf [file bmjopen-2020-042728supp001.pdf]

### Supplementary File 1: Operationalization of data collection in the process evaluation (implementation degree and mechanisms of change) and the outcomes evaluation

|                              | Concept                    | Operationalization                                                                                                                                                         | Data collection                                                                                         |
|------------------------------|----------------------------|----------------------------------------------------------------------------------------------------------------------------------------------------------------------------|---------------------------------------------------------------------------------------------------------|
| <b>Implementation degree</b> |                            |                                                                                                                                                                            |                                                                                                         |
| Organizational development   | Fidelity                   | If the workshops and course has resulted in a shared smoke-free school hours understanding and new skills to support students dealing with not smoking during school hours | Staff survey 1; Staff survey 2                                                                          |
|                              | Adaptions                  | Context-specific adjustments and initiatives                                                                                                                               | Project coordinator survey 2; Facilitator questionnaire (NGOs)                                          |
|                              | Dose                       | Extent to which new learnings from workshops and skills from course are being used at school                                                                               | Staff survey 1; Staff survey 2                                                                          |
|                              | Quality of delivery        | Organization of new learnings and skills at school                                                                                                                         | Staff survey 1; Staff survey 2                                                                          |
|                              | Participant responsiveness | Attitudes towards workshops and course                                                                                                                                     | Staff survey 1; Staff survey 2                                                                          |
|                              | Reach                      | For whom is the component implemented (sub-group analysis)                                                                                                                 | Staff survey 1; Staff survey 2                                                                          |
| Physical environment changes | Fidelity                   | If new school-break activities and smoke-free-signing has been established, and smoking facilities removed                                                                 | Project coordinator survey 2                                                                            |
|                              | Adaptions                  | Context-specific adjustments and initiatives                                                                                                                               | Project coordinator survey 2; structured observations on school grounds; Project coordinator interviews |
|                              | Dose                       | Extent to which school-break activities and smoke-free signing is known to students                                                                                        | Student survey 2                                                                                        |
|                              | Quality of delivery        | Extent to which new school-break activities are being used by students and smoke-free signing has a prominent position                                                     | Student survey 2; structured observations on school grounds                                             |
|                              | Participant responsiveness | Attitudes towards workshops new school-break activities and smoke-free-signing                                                                                             | Student survey 2                                                                                        |
|                              | Reach                      | For whom is the component implemented (sub-group analysis)                                                                                                                 | Student survey 2                                                                                        |
| Individual guidance          | Fidelity                   | If the school offers smoking cessation help or other help for students to cope with smoke-free school hours                                                                | Project coordinator survey 2                                                                            |
|                              | Adaptions                  | Context-specific adjustments and initiatives                                                                                                                               | Project coordinator survey 1; Project coordinator survey 2; Project coordinator interview               |
|                              | Dose                       | Number of smoking cessation courses delivered and number of students attending the courses                                                                                 | Project coordinator survey 1; Project coordinator survey 2                                              |
|                              | Quality of delivery        | Extent to which students know which support to cope with smoke-free school hours is provided                                                                               | Student survey 2                                                                                        |
|                              | Participant responsiveness | Attitudes towards help to cope with smoke-free school hours and attitudes towards attending smoking cessation courses                                                      | Student survey 2                                                                                        |

|                                                                                                                                                                              |                            |                                                                                                                                                                                                                                                                                                                                                                                                            |                                                                                                           |
|------------------------------------------------------------------------------------------------------------------------------------------------------------------------------|----------------------------|------------------------------------------------------------------------------------------------------------------------------------------------------------------------------------------------------------------------------------------------------------------------------------------------------------------------------------------------------------------------------------------------------------|-----------------------------------------------------------------------------------------------------------|
|                                                                                                                                                                              | Reach                      | For whom is the component implemented (sub-group analysis)                                                                                                                                                                                                                                                                                                                                                 | Student survey 2                                                                                          |
| Capacity building between the school and community                                                                                                                           | Fidelity                   | If the relationship between school and NGOs, and school and municipality has been strengthened                                                                                                                                                                                                                                                                                                             | Project coordinator survey 2                                                                              |
|                                                                                                                                                                              | Adaptions                  | Context-specific adjustments and initiatives                                                                                                                                                                                                                                                                                                                                                               | Project coordinator survey 2; Project coordinator interview                                               |
|                                                                                                                                                                              | Dose                       | Extent to which the school has discussed smoke-free school hours implementation with NGOs and local municipality                                                                                                                                                                                                                                                                                           | Project coordinator survey 2                                                                              |
|                                                                                                                                                                              | Quality of delivery        | Extent to which the schools has experienced support from the NGOs and local municipality                                                                                                                                                                                                                                                                                                                   | Project coordinator survey 2                                                                              |
|                                                                                                                                                                              | Participant responsiveness | Attitudes towards integrating external resources in smoke-free school hours implementation                                                                                                                                                                                                                                                                                                                 | Staff survey 2                                                                                            |
|                                                                                                                                                                              | Reach                      | For whom is the component implemented (sub-group analysis)                                                                                                                                                                                                                                                                                                                                                 | Facilitator questionnaire (NGOs)                                                                          |
| Smoke-free school hours implementation                                                                                                                                       | Fidelity                   | If smoking is allowed during school hours and extent to which students experience smoking during school-hours                                                                                                                                                                                                                                                                                              | Staff survey 2; Staff survey 3; Student survey 2                                                          |
|                                                                                                                                                                              | Adaptions                  | Context-specific adjustments in sanctioning and enforcement procedures and practice                                                                                                                                                                                                                                                                                                                        | Staff survey 2; Staff survey 3; Project coordinator interview                                             |
|                                                                                                                                                                              | Dose                       | Extent to which students know the policy and extent of smoking visibility                                                                                                                                                                                                                                                                                                                                  | Student survey 2, Staff survey 2; Staff survey 3; Structured observations on school grounds               |
|                                                                                                                                                                              | Quality of delivery        | Frequency and manner/method of enforcement                                                                                                                                                                                                                                                                                                                                                                 | Staff survey 2; Staff survey 3                                                                            |
|                                                                                                                                                                              | Participant responsiveness | Attitudes towards the policy and whether staff experience the policy as a normal part of their work                                                                                                                                                                                                                                                                                                        | Student survey 2; Staff survey 2; Staff survey 3                                                          |
|                                                                                                                                                                              | Reach                      | For whom is the component implemented (sub-group analysis)                                                                                                                                                                                                                                                                                                                                                 | Student survey 2; Staff survey 2; Staff survey 3                                                          |
| <b>Mechanisms of change</b>                                                                                                                                                  |                            |                                                                                                                                                                                                                                                                                                                                                                                                            |                                                                                                           |
| Interactions between the intervention and context-mechanisms i.e. reasoning and behavior among participants, constrained by e.g. organizational norms, values and discourses | Coherence                  | If and why smoke-free school hours makes sense given the situation the school currently face. Extant to which there's a shared understanding about the policy and the organizational members see the potential value of smoke-free school hours.                                                                                                                                                           | Management interview; Project coordinator interview; Teacher focus groups; Staff survey 2; Staff survey 3 |
|                                                                                                                                                                              | Cognitive participation    | If and how there's been established a community of practice around smoke-free school hours, if there's key people driving the implementation forward or the contrary and who. If it is seen as a legitimate part of the schoolwork and if there's been established new practices. Extent to which the organizational members are open to change their daily routines to work with smoke-free school hours. |                                                                                                           |
|                                                                                                                                                                              | Collective action          | If and how smoke-free school hours in enacted as part of routine practice including management practices e.g. how is the work organized and which resources are in place to support the implementation. To what extent the work can be integrated into the everyday school practices and whether people involved has sufficient skills and confidence in work with smoke-free school hours.                |                                                                                                           |
|                                                                                                                                                                              | Reflexive monitoring       | If and how smoke-free school hours affect the everyday school life. Formel and informal appraisal procedures and reconfiguration.                                                                                                                                                                                                                                                                          |                                                                                                           |

| <b>Sub-study 3: Outcomes</b> |                            |                                                                        |                  |
|------------------------------|----------------------------|------------------------------------------------------------------------|------------------|
| Baseline                     | Primary outcome measure    | Smoking during school hours (Y/N)                                      | Student survey 1 |
|                              | Secondary outcome measures | Number of cigarettes smoked per day, Intention to quit, Smoking status |                  |
|                              | Covariates                 | Age, gender, SES etc.                                                  |                  |
| Follow-up 1                  | Primary outcome measure    | Smoking during school hours (Y/N)                                      | Student survey 2 |
|                              | Secondary outcome measures | Number of cigarettes smoked per day, Intention to quit, Smoking status |                  |
|                              | Covariates                 | Age, gender, SES etc.                                                  |                  |
| Follow-up 2                  | Primary outcome measure    | Smoking during school hours (Y/N)                                      | Student survey 3 |
|                              | Secondary outcome measures | Number of cigarettes smoked per day, Intention to quit, Smoking status |                  |
|                              | Covariates                 | Age, gender, SES etc.                                                  |                  |
